# Supplementary material for: Improved annotation of Lutzomyia longipalpis genome using bioinformatics analysis
Source: PeerJ. 2019 Oct 9;7:e7862. doi: 10.7717/peerj.7862 (PMC6790103; doi:10.7717/peerj.7862)
Supplement: Table S1 [file peerj-07-7862-s001.xlsx]

## Sheet: Supp.Table_1
No.	Accession	Previous annotation	homolog	identity	E-value	Our annotated gene	Our annotated protein
1	A0A1B0CHS6	Uncharacterized protein	ADA2_XENLA	38.93	1e-110	Ada	Salivary adenosine deaminase
2	A0A1B0CED4	Uncharacterized protein	TAL1_TAKRU	62.75	9e-15	Bhlh	Salivary gland-expressed Bhlh
3	A0A1B0EW45	Uncharacterized protein	GD_DROME	29.3	2e-09	Cbp3	Chitin binding protein 3
4	A0A1B0CKB6	Uncharacterized protein	CHS2_CAEEL	32.03	5e-08	Chs1b	Chitin synthetase 1b
5	A0A1B0CAI6	Uncharacterized protein	CRQ_DROME	43.09	8e-155	Crq	Midgut protein croquemort
6	A0A1B0CUL7	Uncharacterized protein	FER3_DROME	60.2	4e-62	Fer3	Intestinal protein Fer3
7	A0A1B0CKK7	Uncharacterized protein	OBSTE_DROME	39.44	2e-06	Iim1	Insect intestinal mucin 1
8	A0A1B0CJD3	Uncharacterized protein	PA1_POLAN	28.4	3e-26	Lip5	Insect intestinal lipase 5
9	A0A1B0CWC2	Uncharacterized protein	LIPH_XENTR	40.22	3e-16	Lip8	Insect intestinal lipase 8
10	A0A1B0CJD2	Uncharacterized protein	PA1_VESGE	28.15	2e-27	Lip9	Insect intestinal lipase 9
11	A0A1B0GIZ9	Uncharacterized protein	ICA_APIME	28.26	1e-09	Muc3	Salivary secreted mucin 3
12	A0A1B0CGE7	Uncharacterized protein	NEP3_DROME	62.45	0	Nep3	Gut protein Neprilysin 3
13	A0A1B0EUB7	Uncharacterized protein	VASOT_HYBBI	32.93	1e-08	Pia	Salivary glands proteinase inhibitor
14	A0A1B0CXB2	Uncharacterized protein	CREST_XENLA	53.66	1e-17	Prb2	Salivary proline-rich protein 2
15	A0A1B0CK45	Uncharacterized protein	CRBN_DROSI	27.54	9e-09	Salp17	17 kDa salivary protein
16	A0A1B0GKE8	Uncharacterized protein	APY_CIMLE	44.33	9e-75	Salp36	36 kDa salivary protein
17	A0A1B0ESM9	Uncharacterized protein	ENPP4_XENLA	31.33	3e-69	Salp47	47 kDa salivary protein
18	A0A1B0CAP5	Uncharacterized protein	MAS_DROME	60	2e-13	Spa2	Salivary plasminogen activator beta
19	A0A1B0CK70	Uncharacterized protein	FIGL1_XENLA	52.62	2e-130	Spas	Spastin
20	A0A1B0GL15	Uncharacterized protein	SSK_DROME	69.03	4e-77	Ssk	Intestinal protein snakeskin
21	A0A1B0CC54	Uncharacterized protein	EAST_DROME	44.9	2e-07	Ssp2	Salivary serine protease 2
22	A0A1B0CE59	Uncharacterized protein	IMPI_GALME	33.56	3e-06	Sspi	Salivary secreted serine protease inhibitor
23	A0A1B0CP47	Uncharacterized protein	TAOK3_CHICK	52.06	0	Tao	Midgut serine/threonine-protein kinase Tao
24	A0A1B0CS99	Uncharacterized protein	SNAK_DROME	37.75	5e-87	Urtb	Salivary plasminogen activator beta
25	A0A1B0CJJ3	Uncharacterized protein	PPAF2_HOLDI	38.46	1e-07	Urtg	Salivary plasminogen activator gamma
26	A0A1B0C7Y6	Uncharacterized protein	JIP3_DROME	73.75	0	Syd	JNK-interacting protein 3
27	A0A1B0C7Y8	Uncharacterized protein	KS6A5_CHICK	59.43	4e-33	Ks6a5	Ribosomal protein S6 kinase alpha-5
28	A0A1B0C7Y9	Uncharacterized protein	CL190_DROME	49.32	9e-17	Cl190	Restin homolog
29	A0A1B0C7Z4	Uncharacterized protein	TDRD3_CHICK	41.58	2e-13	Tdrd3	Tudor domain-containing protein 3
30	A0A1B0C7Z7	Uncharacterized protein	ZBT17_CHICK	27.92	6e-21	Zbt17	Zinc finger and BTB domain-containing protein 17
31	A0A1B0C7Z8	Uncharacterized protein	ZG17_XENLA	33.17	4e-24	Zg17	Gastrula zinc finger protein XlCGF17.1
32	A0A1B0C7Z9	Uncharacterized protein	ZO84_XENLA	31.82	3e-06	Zo84	Oocyte zinc finger protein XlCOF8.4
33	A0A1B0C800	Uncharacterized protein	ZO6_XENLA	29.75	5e-34	Zo6	Oocyte zinc finger protein XlCOF6
34	A0A1B0C801	Uncharacterized protein	ZG26_XENLA	29.6	2e-45	Zg26	Gastrula zinc finger protein XlCGF26.1
35	A0A1B0C803	Uncharacterized protein	ZO71_XENLA	26.89	2e-07	Zo71	Oocyte zinc finger protein XlCOF7.1
36	A0A1B0C804	Uncharacterized protein	ZG57_XENLA	30.56	3e-16	Zg57	Gastrula zinc finger protein XlCGF57.1
37	A0A1B0C805	Uncharacterized protein	ZG57_XENLA	34.15	3e-22	Zg57	Gastrula zinc finger protein XlCGF57.1
38	A0A1B0C806	Uncharacterized protein	ZG57_XENLA	30.25	8e-37	Zg57	Gastrula zinc finger protein XlCGF57.1
39	A0A1B0C807	Uncharacterized protein	DRL_DANRE	27.71	3e-09	Drl	Zinc finger protein draculin
40	A0A1B0C808	Uncharacterized protein	ZG26_XENLA	27.4	6e-06	Zg26	Gastrula zinc finger protein XlCGF26.1
41	A0A1B0C809	Uncharacterized protein	SUHW_DROME	23.91	8e-09	Suhw	Protein suppressor of hairy wing
42	A0A1B0C810	Uncharacterized protein	FEZF1_XENTR	30.23	3e-14	Fezf1	Fez family zinc finger protein 1
43	A0A1B0C811	Uncharacterized protein	PINTA_DROME	27.2	1e-24	Pinta	Retinol-binding protein pinta
44	A0A1B0C812	Uncharacterized protein	ARS_STRPU	28.86	2e-28	Ars	Arylsulfatase
45	A0A1B0C813	Uncharacterized protein	ARS_STRPU	38.76	7e-19	Ars	Arylsulfatase
46	A0A1B0C814	Uncharacterized protein	ARS_STRPU	26.09	1e-16	Ars	Arylsulfatase
47	A0A1B0C820	Uncharacterized protein	ARS_STRPU	27.7	2e-21	Ars	Arylsulfatase
48	A0A1B0C821	Uncharacterized protein	ARS_STRPU	38.28	4e-14	Ars	Arylsulfatase
49	A0A1B0C824	Uncharacterized protein	GBRAL_DROME	89.66	6e-12	Grd	Gamma-aminobutyric acid receptor alpha-like
50	A0A1B0C825	Uncharacterized protein	GBRAL_DROME	73.33	3e-14	Grd	Gamma-aminobutyric acid receptor alpha-like
51	A0A1B0C826	Uncharacterized protein	PGP_CHICK	46.15	2e-26	Pgp	Glycerol-3-phosphate phosphatase
52	A0A1B0C827	Uncharacterized protein	DEN5B_DANRE	69.01	2e-25	Den5b	DENN domain-containing protein 5B
53	A0A1B0C828	Uncharacterized protein	QSER1_XENLA	22.16	9e-10	Qser1	Glutamine and serine-rich protein 1
54	A0A1B0C830	Uncharacterized protein	GDIR_CAEEL	41.27	2e-22	Gdir	Probable rho GDP-dissociation inhibitor
55	A0A1B0C831	Uncharacterized protein	U1SBP_XENLA	54.07	3e-49	U1sbp	U11/U12 small nuclear ribonucleoprotein 35 kDa protein
56	A0A1B0C835	Uncharacterized protein	VIT_PENME	23.42	7e-73	Vit	Vitellogenin
57	A0A1B0C838	Uncharacterized protein	MED23_AEDAE	69.91	0	Med23	Mediator of RNA polymerase II transcription subunit 23
58	A0A1B0C839	Uncharacterized protein	INSM1_XENTR	40.38	8e-07	Insm1	Insulinoma-associated protein 1
59	A0A1B0C840	Uncharacterized protein	LOLAL_DROME	50.85	2e-40	Lolal	Longitudinals lacking protein-like
60	A0A1B0C841	Uncharacterized protein	CP305_DROME	35.1	3e-31	Cp305	Probable cytochrome P450 305a1
61	A0A1B0C842	Uncharacterized protein	CP18A_DROME	48.48	3e-14	Cp18a	Cytochrome P450 18a1
62	A0A1B0C843	Uncharacterized protein	SUWA_DROME	36.84	8e-70	Suwa	Protein suppressor of white apricot
63	A0A1B0C844	Uncharacterized protein	SL172_CAEEL	32.76	9e-15	Sl172	Uncharacterized transporter slc-17.2
64	A0A1B0C846	Uncharacterized protein	VGL2B_DANRE	39.33	1e-14	Vgl2b	Vesicular glutamate transporter 2.2
65	A0A1B0C847	Uncharacterized protein	RTXE_DROME	32.84	2e-07	Rtxe	Probable RNA-directed DNA polymerase from transposon X-element
66	A0A1B0C848	Uncharacterized protein	IR21A_DROME	45.61	4e-08	Ir21a	Ionotropic receptor 21a
67	A0A1B0C849	Uncharacterized protein	JIP3_DROME	76.82	1e-74	Syd	JNK-interacting protein 3
68	A0A1B0C850	Uncharacterized protein	JIP3_DROME	79.46	2e-129	Syd	JNK-interacting protein 3
69	A0A1B0C851	Uncharacterized protein	DC1L1_CHICK	50	8e-139	Dc1l1	Cytoplasmic dynein 1 light intermediate chain 1
70	A0A1B0C853	Uncharacterized protein	LVSA_DICDI	25.22	5e-17	Lvsa	BEACH domain-containing protein lvsA
71	A0A1B0C856	Uncharacterized protein	SMG_DROER	44.4	2e-51	Smg	Protein Smaug
72	A0A1B0C857	Uncharacterized protein	NF1_CHICK	62.77	2e-102	Nf1	Neurofibromin
73	A0A1B0C859	Uncharacterized protein	DHRS4_CAEEL	48.39	1e-37	Dhrs4	Dehydrogenase/reductase SDR family member 4
74	A0A1B0C860	Uncharacterized protein	S39AB_XENTR	42.73	1e-27	S39ab	Zinc transporter ZIP11
75	A0A1B0C861	Uncharacterized protein	LRC57_XENLA	45.99	1e-65	Lrc57	Leucine-rich repeat-containing protein 57
76	A0A1B0C862	Uncharacterized protein	AP3M1_CHICK	68.26	0	Ap3m1	AP-3 complex subunit mu-1
77	A0A1B0C864	Uncharacterized protein	UBC12_XENTR	82.51	1e-109	Ube2m	NEDD8-conjugating enzyme Ubc12
78	A0A1B0C865	Uncharacterized protein	RECQ1_CAEBR	34.3	2e-58	Recq1	Putative ATP-dependent DNA helicase Q1
79	A0A1B0C866	Uncharacterized protein	Y8206_DICDI	35.48	8e-10	Y8206	Probable zinc transporter protein DDB_G0282067
80	A0A1B0C867	Uncharacterized protein	PIGC_DICDI	35.74	1e-32	Pigc	Putative phosphatidylinositol N-acetylglucosaminyltransferase subunit C
81	A0A1B0C868	Uncharacterized protein	TRET1_DROMO	63.22	0	Tret1	Facilitated trehalose transporter Tret1
82	A0A1B0C869	Uncharacterized protein	TRET1_CULQU	83.03	0	Tret1	Facilitated trehalose transporter Tret1
83	A0A1B0C871	Uncharacterized protein	CYBR1_DANRE	36.77	1e-35	Cybr1	Cytochrome b reductase 1
84	A0A1B0C880	Uncharacterized protein	UQCC1_XENLA	39.13	2e-38	Uqcc1	Ubiquinol-cytochrome-c reductase complex assembly factor 1
85	A0A1B0C882	Uncharacterized protein	MZT1_XENTR	46.27	7e-14	Mzt1	Mitotic-spindle organizing protein 1
86	A0A1B0C886	Uncharacterized protein	MCFM_DICDI	32.23	4e-15	Mcfm	Mitochondrial substrate carrier family protein M
87	A0A1B0C887	Uncharacterized protein	ELAV4_XENLA	26.32	3e-15	Elav4	ELAV-like protein 4
88	A0A1B0C888	Uncharacterized protein	L2HDH_CAEBR	58.01	0	L2hdh	L-2-hydroxyglutarate dehydrogenase, mitochondrial
89	A0A1B0C889	Uncharacterized protein	IKKA_DANRE	42.68	3e-66	Chuk	Inhibitor of nuclear factor kappa-B kinase subunit alpha
90	A0A1B0C890	Uncharacterized protein	IKKA_CHICK	22.44	1e-18	Chuk	Inhibitor of nuclear factor kappa-B kinase subunit alpha
91	A0A1B0C891	Uncharacterized protein	CNKR_CAEEL	33.11	4e-11	Cnkr	Connector enhancer of kinase suppressor of ras
92	A0A1B0C893	Uncharacterized protein	FP1V1_PERVI	25.54	1e-07	Fp1v1	Foot protein 1 variant 1
93	A0A1B0C894	Uncharacterized protein	POXN_DROME	82.98	9e-77	Poxn	Paired box pox-neuro protein
94	A0A1B0C895	Uncharacterized protein	POXN_DROME	68.66	2e-23	Poxn	Paired box pox-neuro protein
95	A0A1B0C897	Uncharacterized protein	SIN1_DROPS	38.57	1e-136	Sin1	Stress-activated map kinase-interacting protein 1
96	A0A1B0C898	Uncharacterized protein	EGFR_DROME	51.02	2e-30	Egfr	Epidermal growth factor receptor
97	A0A1B0C899	Uncharacterized protein	YPF17_PLAF7	34.54	5e-08	Ypf17	Protein PF14_0175
98	A0A1B0C8A0	Uncharacterized protein	YO61_CAEEL	38.74	7e-124	Yo61	WW domain-containing protein ZK1098.1
99	A0A1B0C8A1	Uncharacterized protein	TSR2_XENLA	27.88	1e-08	Tsr2	Pre-rRNA-processing protein TSR2 homolog
100	A0A1B0C8A4	Uncharacterized protein	TCPZ_CHICK	67.92	0	Tcpz	T-complex protein 1 subunit zeta
101	A0A1B0C8A8	Uncharacterized protein	LYSC1_ANOGA	40.61	3e-38	Lysc1	Lysozyme c-1
102	A0A1B0C8A9	Uncharacterized protein	LYSC1_ANOGA	44.06	1e-36	Lysc1	Lysozyme c-1
103	A0A1B0C8B0	Uncharacterized protein	RHDF1_DROME	50.98	0	Rhdf1	Inactive rhomboid protein 1
104	A0A1B0C8B1	Uncharacterized protein	RHDF1_DROME	38.18	2e-14	Rhdf1	Inactive rhomboid protein 1
105	A0A1B0C8B2	Uncharacterized protein	MFD6B_DANRE	24.61	9e-20	Mfd6b	Major facilitator superfamily domain-containing protein 6-B
106	A0A1B0C8B3	Uncharacterized protein	TRF_SARPE	30	5e-16	Trf	Transferrin
107	A0A1B0C8B5	Uncharacterized protein	C43BP_XENLA	53.08	5e-40	C43bp	Collagen type IV alpha-3-binding protein
108	A0A1B0C8B6	Uncharacterized protein	C43BP_DANRE	45.45	7e-72	C43bp	Collagen type IV alpha-3-binding protein
109	A0A1B0C8C0	Uncharacterized protein	EME2_XENTR	23.15	3e-11	Eme2	Probable crossover junction endonuclease EME2
110	A0A1B0C8C1	Uncharacterized protein	LAR_DROME	29.81	2e-12	Lar	Tyrosine-protein phosphatase Lar
111	A0A1B0C8C4	Uncharacterized protein	TRY5_AEDAE	63.16	1e-39	Try5	Trypsin 5G1
112	A0A1B0C8C7	Uncharacterized protein	STO4_CAEEL	70.89	1e-69	Sto4	Stomatin-4
113	A0A1B0C8C8	Uncharacterized protein	MTMR4_XENLA	29.11	2e-21	Mtmr4	Myotubularin-related protein 4
114	A0A1B0C8D1	Uncharacterized protein	RS6_SPOFR	91.55	5e-44	Rps6	40S ribosomal protein S6
115	A0A1B0C8D2	Uncharacterized protein	SYP_PLAF7	20.53	2e-07	Prors	Proline--tRNA ligase
116	A0A1B0C8D3	Uncharacterized protein	ARV1_DICDI	34.51	6e-21	Arv1	Protein arv1 homolog
117	A0A1B0C8D4	Uncharacterized protein	MCM8_CHICK	34.51	3e-132	Mcm8	DNA helicase MCM8
118	A0A1B0C8E0	Uncharacterized protein	ZN865_XENTR	24.14	5e-10	Zn865	Zinc finger protein 865
119	A0A1B0C8E1	Uncharacterized protein	FUCTC_DROME	41.37	1e-74	Fuctc	Alpha-(1,3)-fucosyltransferase C
120	A0A1B0C8E5	Uncharacterized protein	PTH2_DROME	52.36	3e-64	Pth2	Probable peptidyl-tRNA hydrolase 2
121	A0A1B0C8E6	Uncharacterized protein	DRONC_DROME	32.58	3e-41	Dronc	Caspase Dronc
122	A0A1B0C8E7	Uncharacterized protein	EXOC6_DROME	58.93	6e-83	Exoc6	Exocyst complex component 6
123	A0A1B0C8E8	Uncharacterized protein	CADM4_XENLA	27.27	1e-07	Cadm4	Cell adhesion molecule 4
124	A0A1B0C8F1	Uncharacterized protein	PLC_HALLA	33.73	4e-08	Plc	Perlucin
125	A0A1B0C8F2	Uncharacterized protein	MOODY_DROME	58.73	9e-168	Moody	G-protein coupled receptor moody
126	A0A1B0C8F4	Uncharacterized protein	TTC30_AEDAE	75.72	0	Ttc30	Tetratricopeptide repeat protein 30 homolog
127	A0A1B0C8F6	Uncharacterized protein	GNAS_ANOGA	89.95	2e-135	Gnas	Guanine nucleotide-binding protein G(s) subunit alpha
128	A0A1B0C8F7	Uncharacterized protein	TRET1_CULQU	27.93	8e-62	Tret1	Facilitated trehalose transporter Tret1
129	A0A1B0C8F9	Uncharacterized protein	TRET1_BOMMO	40.54	1e-08	Tret1	Facilitated trehalose transporter Tret1
130	A0A1B0C8G1	Uncharacterized protein	EMC89_DROME	53.43	3e-72	Emc89	ER membrane protein complex subunit 8/9 homolog
131	A0A1B0C8G2	Uncharacterized protein	S41A2_XENLA	40	1e-108	S41a2	Solute carrier family 41 member 2
132	A0A1B0C8G3	Uncharacterized protein	S41A2_XENLA	31.05	5e-43	S41a2	Solute carrier family 41 member 2
133	A0A1B0C8G4	Uncharacterized protein	RB3GP_XENLA	32.59	4e-26	Rb3gp	Rab3 GTPase-activating protein catalytic subunit
134	A0A1B0C8G6	Uncharacterized protein	FAAA_DICDI	57.14	2e-55	Fah	Fumarylacetoacetase
135	A0A1B0C8K7	Uncharacterized protein	YC91_CAEEL	37.05	4e-103	Yc91	Uncharacterized MFS-type transporter C09D4.1
136	A0A1B0C8K8	Uncharacterized protein	ZBT24_DANRE	25.85	8e-06	Zbt24	Zinc finger and BTB domain-containing protein 24
137	A0A1B0C8K9	Uncharacterized protein	DRL_DANRE	32.86	6e-30	Drl	Zinc finger protein draculin
138	A0A1B0C8L0	Uncharacterized protein	PELET_DROME	27.42	3e-06	Pelet	Transposable element P transposase
139	A0A1B0C8L1	Uncharacterized protein	A37C_DROLE	28.98	7e-19	A37c	Protein anon-37Cs
140	A0A1B0C8L2	Uncharacterized protein	UBA1_DICDI	54.17	0	Uba1	Ubiquitin-like modifier-activating enzyme 1
141	A0A1B0C8L5	Uncharacterized protein	CP2B_DROPS	42.37	5e-19	Cp2b	Cardio acceleratory peptide 2b
142	A0A1B0C8L7	Uncharacterized protein	GCY32_CAEEL	33.11	6e-25	Gcy32	Soluble guanylate cyclase gcy-32
143	A0A1B0C8L8	Uncharacterized protein	FPPS_CHICK	36.97	9e-60	Fdps	Farnesyl pyrophosphate synthase
144	A0A1B0C8M0	Uncharacterized protein	SRP54_GEOCY	82.76	3e-27	Srp54	Signal recognition particle 54 kDa protein
145	A0A1B0C8M1	Uncharacterized protein	MET23_XENLA	48.08	1e-65	Met23	Methyltransferase-like protein 23
146	A0A1B0C8M5	Uncharacterized protein	GSTT7_ANOGA	43.52	5e-28	Gstt7	Glutathione S-transferase D7
147	A0A1B0C8M7	Uncharacterized protein	RTBS_DROME	29.07	4e-41	Rtbs	Probable RNA-directed DNA polymerase from transposon BS
148	A0A1B0C8M9	Uncharacterized protein	NLTP_CHICK	40	9e-07	Scp2	Non-specific lipid-transfer protein
149	A0A1B0C8N0	Uncharacterized protein	MFEA_DICDI	34.15	4e-06	Mfea	Peroxisomal multifunctional enzyme A
150	A0A1B0C8N3	Uncharacterized protein	MAAI2_DROME	91.16	5e-147	Gstz2	Probable maleylacetoacetate isomerase 2
151	A0A1B0C8N5	Uncharacterized protein	PINTA_DROME	21.48	8e-11	Pinta	Retinol-binding protein pinta
152	A0A1B0C8N6	Uncharacterized protein	VPS25_DROME	53.45	2e-65	Vps25	Vacuolar protein-sorting-associated protein 25
153	A0A1B0C8N7	Uncharacterized protein	DNJ5_CAEEL	34.22	3e-30	Dnj5	DnaJ homolog dnj-5
154	A0A1B0C8N8	Uncharacterized protein	CWO_DROME	31.86	4e-23	Cwo	Transcription factor cwo
155	A0A1B0C8P0	Uncharacterized protein	YH24_CAEEL	43.78	3e-131	Yh24	Putative aminopeptidase W07G4.4
156	A0A1B0C8P4	Uncharacterized protein	POL3_DROME	40.69	3e-29	Pol	Retrovirus-related Pol polyprotein from transposon 17.6
157	A0A1B0C8P5	Uncharacterized protein	IF122_XENTR	48.62	0	If122	Intraflagellar transport protein 122 homolog
158	A0A1B0C8P6	Uncharacterized protein	ZB16A_DANRE	28.17	9e-10	Zb16a	Zinc finger and BTB domain-containing protein 16-A
159	A0A1B0C8P7	Uncharacterized protein	SYYC_DANRE	51.25	3e-97	Yars	Tyrosine--tRNA ligase, cytoplasmic
160	A0A1B0C8P8	Uncharacterized protein	ZG57_XENLA	26.18	7e-07	Zg57	Gastrula zinc finger protein XlCGF57.1
161	A0A1B0C8Q0	Uncharacterized protein	HACL1_DICDI	39.08	6e-133	Hacl1	Probable 2-hydroxyacyl-CoA lyase 1
162	A0A1B0C8Q2	Uncharacterized protein	HEXP_LEIMA	45.65	0.0003	Hexbp	DNA-binding protein HEXBP
163	A0A1B0C8Q3	Uncharacterized protein	TRY4_ANOGA	24.27	9e-09	Tryp4	Trypsin-4
164	A0A1B0C8Q5	Uncharacterized protein	PAL1_DROME	50	1e-47	Pal1	Peptidyl-alpha-hydroxyglycine alpha-amidating lyase 1
165	A0A1B0C8Q6	Uncharacterized protein	YS4L_CAEEL	42.26	3e-42	Ys4l	Putative 40S ribosomal protein S4-like
166	A0A1B0C8Q8	Uncharacterized protein	XDH_DICDI	27.64	4e-44	Xdh	Xanthine dehydrogenase
167	A0A1B0C8Q9	Uncharacterized protein	XDH_CHICK	27.09	2e-59	Xdh	Xanthine dehydrogenase/oxidase
168	A0A1B0C8R0	Uncharacterized protein	NCS1_XENLA	41.67	2e-45	Ncs1	Neuronal calcium sensor 1
169	A0A1B0C8R1	Uncharacterized protein	DPM1_DROME	76.58	6e-112	Dpm1	Probable dolichol-phosphate mannosyltransferase
170	A0A1B0C8R3	Uncharacterized protein	HFW1_DROPS	52.68	4e-103	Hfw	Protein halfway
171	A0A1B0C8R4	Uncharacterized protein	DDX52_DICDI	48.83	1e-145	Ddx52	Probable ATP-dependent RNA helicase ddx52
172	A0A1B0C8R6	Uncharacterized protein	IF4A_DICDI	29.63	2e-42	Tifa	Eukaryotic initiation factor 4A
173	A0A1B0C8R7	Uncharacterized protein	TF3C5_DICDI	30.94	6e-29	Tf3c5	General transcription factor 3C polypeptide 5
174	A0A1B0C8R8	Uncharacterized protein	KL61_DROME	46.97	0	Kl61	Kinesin-like protein Klp61F
175	A0A1B0C8S0	Uncharacterized protein	DYF2_CAEEL	33.48	0	Dyf2	WD repeat-containing protein dyf-2
176	A0A1B0C8S1	Uncharacterized protein	GUAA_DICDI	54.86	1e-56	Guaa	GMP synthase [glutamine-hydrolyzing]
177	A0A1B0C8S3	Uncharacterized protein	HEM_DROME	83.89	0	Hem	Membrane-associated protein Hem
178	A0A1B0C8S4	Uncharacterized protein	MED24_AEDAE	45.45	2e-65	Med24	Mediator of RNA polymerase II transcription subunit 24
179	A0A1B0C8S5	Uncharacterized protein	HEM_DROME	88.24	4e-44	Hem	Membrane-associated protein Hem
180	A0A1B0C8S6	Uncharacterized protein	MED24_AEDAE	54.55	0.0002	Med24	Mediator of RNA polymerase II transcription subunit 24
181	A0A1B0C8S7	Uncharacterized protein	FA49A_CHICK	45.07	1e-09	Fa49a	Protein FAM49A
182	A0A1B0C8S8	Uncharacterized protein	PAR1_CAEBR	69.96	1e-119	Par1	Serine/threonine-protein kinase par-1
183	A0A1B0C8T0	Uncharacterized protein	SYG2_CAEEL	28.24	1e-07	Syg2	Synaptogenesis protein syg-2
184	A0A1B0C8T3	Uncharacterized protein	XFIN_XENLA	28.11	1e-11	Xfin	Zinc finger protein Xfin
185	A0A1B0C8T4	Uncharacterized protein	ARR1_ONCMY	51.56	1e-149	Arr1	Arrestin red cell isoform 1
186	A0A1B0C8T5	Uncharacterized protein	COGS_HYPLI	39.66	1e-43	Cogs	Collagenase
187	A0A1B0C8T6	Uncharacterized protein	ANR44_CHICK	22.31	2e-06	Anr44	Serine/threonine-protein phosphatase 6 regulatory ankyrin repeat subunit B
188	A0A1B0C8T9	Uncharacterized protein	NS1BA_DANRE	24.37	9e-19	Ns1ba	Influenza virus NS1A-binding protein homolog A
189	A0A1B0C8U0	Uncharacterized protein	ZBT17_CHICK	32.74	2e-19	Zbt17	Zinc finger and BTB domain-containing protein 17
190	A0A1B0C8U2	Uncharacterized protein	NTM1_DROME	46.59	7e-72	Ntmt	Alpha N-terminal protein methyltransferase 1
191	A0A1B0C8U5	Uncharacterized protein	DYHC_TRIGR	27.27	5e-53	Dyhc	Dynein beta chain, ciliary
192	A0A1B0C8U6	Uncharacterized protein	ABRU_DROME	59.41	2e-105	Abru	Protein abrupt
193	A0A1B0C8U7	Uncharacterized protein	GPRK1_DROME	64.81	1e-40	Gprk1	G protein-coupled receptor kinase 1
194	A0A1B0C8U8	Uncharacterized protein	ERGI3_DANRE	53.76	5e-69	Ergi3	Endoplasmic reticulum-Golgi intermediate compartment protein 3
195	A0A1B0C8V4	Uncharacterized protein	RBF1_CAEEL	40.37	7e-15	Rbf1	Rabphilin-1
196	A0A1B0C8V5	Uncharacterized protein	VMP1_XENTR	52.69	4e-128	Vmp1	Vacuole membrane protein 1
197	A0A1B0C8W0	Uncharacterized protein	ABCGK_DICDI	28.57	2e-19	Abcgk	ABC transporter G family member 20
198	A0A1B0C8W2	Uncharacterized protein	SECG_DICDI	39.44	6e-40	Secg	Ankyrin repeat, PH and SEC7 domain containing protein secG
199	A0A1B0C8W3	Uncharacterized protein	UFD4_DROME	62.95	0	Ufd4	E3 ubiquitin-protein ligase Ufd4
200	A0A1B0C8W4	Uncharacterized protein	PGAM5_DROAN	50	6e-56	Pgam5	Serine/threonine-protein phosphatase Pgam5, mitochondrial
201	A0A1B0C8W5	Uncharacterized protein	SCP1_ASTLP	44.78	9e-17	Scp1	Sarcoplasmic calcium-binding protein 1
202	A0A1B0C8W9	Uncharacterized protein	CHST3_TETCF	31.01	1e-13	Chst3	Carbohydrate sulfotransferase 3
203	A0A1B0C8X0	Uncharacterized protein	CNOT6_XENLA	27.25	2e-31	Cnot6	CCR4-NOT transcription complex subunit 6
204	A0A1B0C8X1	Uncharacterized protein	PAXI_CHICK	40.87	5e-25	Pxn	Paxillin
205	A0A1B0C8X5	Uncharacterized protein	UH1BL_XENLA	30.23	5e-100	Uh1bl	UHRF1-binding protein 1-like
206	A0A1B0C8X8	Uncharacterized protein	CU20_TENMO	52.78	6e-17	Acp20	Adult-specific cuticular protein ACP-20
207	A0A1B0C8Y3	Uncharacterized protein	OVCH2_BUFJA	51.61	1e-11	Ovch2	Ovochymase-2
208	A0A1B0C8Y4	Uncharacterized protein	RAD54_DROWI	63.37	0	Rad54	DNA repair and recombination protein RAD54-like
209	A0A1B0C8Y5	Uncharacterized protein	ZG52_XENLA	36.05	2e-11	Zg52	Gastrula zinc finger protein XlCGF52.1
210	A0A1B0C8Y6	Uncharacterized protein	ZG52_XENLA	37.23	3e-12	Zg52	Gastrula zinc finger protein XlCGF52.1
211	A0A1B0C8Y9	Uncharacterized protein	TELO2_DANRE	24.76	1e-54	Telo2	Telomere length regulation protein TEL2 homolog
212	A0A1B0C8Z0	Uncharacterized protein	NOP56_CAEEL	59.67	0	Nop56	Nucleolar protein 56
213	A0A1B0C8Z1	Uncharacterized protein	TAF1B_DROME	28.48	2e-63	Taf1b	TATA box-binding protein-associated factor RNA polymerase I subunit B
214	A0A1B0C8Z3	Uncharacterized protein	ACHA7_CHICK	50	2e-05	Acha7	Neuronal acetylcholine receptor subunit alpha-7
215	A0A1B0C8Z4	Uncharacterized protein	EMAP_LYTVA	45.11	0	Emap	77 kDa echinoderm microtubule-associated protein
216	A0A1B0C8Z5	Uncharacterized protein	LIPB_CAEEL	42.31	7e-12	Lipb	Liprin-beta
217	A0A1B0C8Z6	Uncharacterized protein	CCNB_DROME	43.86	6e-27	Cycb	G2/mitotic-specific cyclin-B
218	A0A1B0C8Z9	Uncharacterized protein	DCAF8_XENLA	52.38	2e-22	Dcaf8	DDB1- and CUL4-associated factor 8
219	A0A1B0C900	Uncharacterized protein	ZG17_XENLA	43.61	1e-25	Zg17	Gastrula zinc finger protein XlCGF17.1
220	A0A1B0C901	Uncharacterized protein	AUB_DROME	43.23	0	Aub	Protein aubergine
221	A0A1B0C902	Uncharacterized protein	KIFA3_STRPU	50.18	9e-71	Kifa3	Kinesin-associated protein 3
222	A0A1B0C903	Uncharacterized protein	H32_XENTR	100	9e-88	H32	Histone H3.2
223	A0A1B0C904	Uncharacterized protein	TAF13_DICDI	61.7	4e-35	Taf13	Transcription initiation factor TFIID subunit 13
224	A0A1B0C905	Uncharacterized protein	MAFA_DANRE	49.57	2e-27	Mafaa	Transcription factor MafAa
225	A0A1B0C908	Uncharacterized protein	C28D1_DROME	30.79	6e-62	C28d1	Probable cytochrome P450 28d1
226	A0A1B0C911	Uncharacterized protein	OPLA_DICDI	52.35	0	Oplah	5-oxoprolinase
227	A0A1B0C912	Uncharacterized protein	BCN92_DROSU	52	8e-12	Bcn92	Protein bcn92
228	A0A1B0C914	Uncharacterized protein	NEDD4_DROME	50	0.0002	Nedd4	E3 ubiquitin-protein ligase Nedd-4
229	A0A1B0C917	Uncharacterized protein	Y1161_DROME	65.67	1e-43	Y1161	Uncharacterized protein CG1161
230	A0A1B0C919	Uncharacterized protein	RAP1_DROME	30.3	1e-19	Rap1	Ras-related protein Rap1
231	A0A1B0C920	Uncharacterized protein	PCKG_DROME	69.92	0	Pepck	Phosphoenolpyruvate carboxykinase [GTP]
232	A0A1B0C924	Uncharacterized protein	WDR75_XENLA	31.21	5e-15	Wdr75	WD repeat-containing protein 75
233	A0A1B0C925	Uncharacterized protein	WDR75_DANRE	29.17	3e-11	Wdr75	WD repeat-containing protein 75
234	A0A1B0C927	Uncharacterized protein	MLECB_XENLA	47.81	2e-74	Mlecb	Malectin-B
235	A0A1B0C929	Uncharacterized protein	VA5_RHYBR	29.79	2e-25	Va5	Venom allergen 5
236	A0A1B0C930	Uncharacterized protein	TRYU_DROME	42.86	2e-27	Tryu	Trypsin eta
237	A0A1B0C931	Uncharacterized protein	MTMRD_XENLA	31.68	4e-08	Sbf2	Myotubularin-related protein 13
238	A0A1B0C932	Uncharacterized protein	KL98A_DROME	30.18	8e-13	Kl98a	Kinesin-like protein Klp98A
239	A0A1B0C933	Uncharacterized protein	BGBP_TENMO	37.9	2e-19	Grp	Beta-1,3-glucan-binding protein
240	A0A1B0C934	Uncharacterized protein	BGBP2_MANSE	38.21	2e-20	Bgbp2	Beta-1,3-glucan-binding protein 2
241	A0A1B0C935	Uncharacterized protein	EGAL1_CAEEL	27.43	2e-11	Egal1	Egalitarian protein homolog
242	A0A1B0C936	Uncharacterized protein	WWOX_CHICK	39.16	8e-55	Wwox	WW domain-containing oxidoreductase
243	A0A1B0C937	Uncharacterized protein	WSCK_DROME	40.39	8e-173	Wsck	Putative tyrosine-protein kinase Wsck
244	A0A1B0C938	Uncharacterized protein	HIL_DROME	88.39	0	Hil	Hillarin
245	A0A1B0C940	Uncharacterized protein	GUS_DROME	87.55	1e-153	Gus	Protein gustavus
246	A0A1B0C941	Uncharacterized protein	MED25_DROME	56.86	1e-41	Med25	Mediator of RNA polymerase II transcription subunit 25
247	A0A1B0C942	Uncharacterized protein	KAPR2_DROME	29.03	1e-08	Kapr2	cAMP-dependent protein kinase type II regulatory subunit
248	A0A1B0C943	Uncharacterized protein	PHO_DROME	27.27	6e-06	Pho	Polycomb protein PHO
249	A0A1B0C944	Uncharacterized protein	GBS76_DROME	46.26	4e-22	Gbs76	Glycogen-binding subunit 76A
250	A0A1B0C945	Uncharacterized protein	RFC2_DROME	80	0	Rfc4	Replication factor C subunit 2
251	A0A1B0C946	Uncharacterized protein	HDHD2_DANRE	47.06	1e-63	Hdhd2	Haloacid dehalogenase-like hydrolase domain-containing protein 2
252	A0A1B0C947	Uncharacterized protein	STRP1_DANRE	60.17	3e-87	Strp1	Striatin-interacting protein 1 homolog
253	A0A1B0C948	Uncharacterized protein	XFIN_XENLA	23.12	2e-10	Xfin	Zinc finger protein Xfin
254	A0A1B0C949	Uncharacterized protein	CKR1_CHICK	20.78	2e-10	Ckr1	Zinc finger protein CKR1
255	A0A1B0C952	Uncharacterized protein	OBP67_ANOGA	23.79	4e-06	Obp67	General odorant-binding protein 67
256	A0A1B0C954	Uncharacterized protein	T161A_XENTR	37.65	2e-120	T161a	Transmembrane protein 161A
257	A0A1B0C957	Uncharacterized protein	IKZF1_ONCMY	42.65	1e-09	Ikzf1	DNA-binding protein Ikaros
258	A0A1B0C959	Uncharacterized protein	KCNQ1_SQUAC	55.65	0	Kcnq1	Potassium voltage-gated channel subfamily KQT member 1
259	A0A1B0C960	Uncharacterized protein	YZR5_CAEEL	49.61	3e-120	Yzr5	Uncharacterized protein F21D5.5
260	A0A1B0C961	Uncharacterized protein	POC1B_XENTR	46.2	3e-93	Poc1b	POC1 centriolar protein homolog B
261	A0A1B0C962	Uncharacterized protein	TRYT_DROME	35.47	5e-45	Tryt	Trypsin theta
262	A0A1B0C963	Uncharacterized protein	PGP2L_DROME	58.73	1e-106	Pgp2l	Post-GPI attachment to proteins factor 2-like
263	A0A1B0C964	Uncharacterized protein	MAB21_ANOGA	69.32	0	Mab21	Protein mab-21
264	A0A1B0C965	Uncharacterized protein	MAB21_DROPS	98.4	0	Mab21	Protein mab-21
265	A0A1B0C968	Uncharacterized protein	ELAV4_XENTR	68.22	4e-45	Elav4	ELAV-like protein 4
266	A0A1B0C969	Uncharacterized protein	MTR1_DROME	46.01	0	Mtr1	Cap-specific mRNA (nucleoside-2'-O-)-methyltransferase 1
267	A0A1B0C970	Uncharacterized protein	RHG15_CHICK	35.23	4e-10	Rhg15	Rho GTPase-activating protein 15
268	A0A1B0C971	Uncharacterized protein	DYHC_TRIGR	63.64	2e-22	Dyhc	Dynein beta chain, ciliary
269	A0A1B0C972	Uncharacterized protein	DYHC_TRIGR	59.43	0	Dyhc	Dynein beta chain, ciliary
270	A0A1B0C973	Uncharacterized protein	HH_DROMO	48.46	2e-63	Hh	Protein hedgehog
271	A0A1B0C974	Uncharacterized protein	NPC2_DANRE	27.68	1e-09	Npc2	NPC intracellular cholesterol transporter 2
272	A0A1B0C975	Uncharacterized protein	SAS_DROME	36.44	2e-113	Sas	Putative epidermal cell surface receptor
273	A0A1B0C987	Uncharacterized protein	LMLN_DROME	72.8	0	Lmln	Leishmanolysin-like peptidase
274	A0A1B0C989	Uncharacterized protein	EDC4_DROME	29.36	2e-25	Edc4	Enhancer of mRNA-decapping protein 4 homolog
275	A0A1B0C992	Uncharacterized protein	TBK1_XENLA	36.75	6e-153	Tbk1	Serine/threonine-protein kinase TBK1
276	A0A1B0C993	Uncharacterized protein	MTUS1_XENLA	22.43	7e-06	Mtus1	Microtubule-associated tumor suppressor 1 homolog
277	A0A1B0C995	Uncharacterized protein	SMU2_CAEEL	59.46	0.0007	Smu2	Smu-2 suppressor of mec-8 and unc-52 protein
278	A0A1B0C996	Uncharacterized protein	METL_DROME	40.48	2e-47	Metl	Methyltransferase-like protein
279	A0A1B0C998	Uncharacterized protein	CP6G2_DROME	43.3	1e-17	Cp6g2	Probable cytochrome P450 6g2
280	A0A1B0C999	Uncharacterized protein	ZN521_XENLA	25.32	8e-09	Zn521	Zinc finger protein 521
281	A0A1B0C9A0	Uncharacterized protein	NAF1_DROME	51.53	1e-48	Naf1	H/ACA ribonucleoprotein complex non-core subunit NAF1
282	A0A1B0C9A1	Uncharacterized protein	RHG26_XENTR	60	5e-15	Rhg26	Rho GTPase-activating protein 26
283	A0A1B0C9A2	Uncharacterized protein	TM237_XENTR	21.36	6e-09	Tm237	Transmembrane protein 237
284	A0A1B0C9A7	Uncharacterized protein	H2B_ANOGA	100	2e-24	H2b	Histone H2B
285	A0A1B0C9A8	Uncharacterized protein	PACN1_DANRE	45.47	2e-136	Pacn1	Protein kinase C and casein kinase substrate in neurons protein 1
286	A0A1B0C9A9	Uncharacterized protein	CWC22_MUSDO	80.76	0	Cwc22	Pre-mRNA-splicing factor CWC22 homolog
287	A0A1B0C9B0	Uncharacterized protein	RREB1_CHICK	46.81	4e-06	Rreb1	Ras-responsive element-binding protein 1
288	A0A1B0C9B1	Uncharacterized protein	SCR_DROME	50.43	2e-18	Scr	Homeotic protein Sex combs reduced
289	A0A1B0C9B8	Uncharacterized protein	PPR37_DANRE	39.18	4e-12	Ppr37	Protein phosphatase 1 regulatory subunit 37
290	A0A1B0C9B9	Uncharacterized protein	OCTB1_DROME	56.2	9e-85	Octb1	Octopamine receptor beta-1R
291	A0A1B0C9C2	Uncharacterized protein	NETA_DROME	49.44	3e-113	Neta	Netrin-A
292	A0A1B0C9C4	Uncharacterized protein	PGP_CHICK	29.57	4e-23	Pgp	Glycerol-3-phosphate phosphatase
293	A0A1B0C9C5	Uncharacterized protein	YMQ1_CAEEL	36.04	5e-12	Ymq1	Putative NipSnap protein K02D10.1
294	A0A1B0C9C6	Uncharacterized protein	YMQ1_CAEEL	29.73	3e-23	Ymq1	Putative NipSnap protein K02D10.1
295	A0A1B0C9C7	Uncharacterized protein	ACSF2_DANRE	42.72	4e-73	Acsf2	Acyl-CoA synthetase family member 2, mitochondrial
296	A0A1B0C9C8	Uncharacterized protein	ACSF2_DANRE	39.58	3e-13	Acsf2	Acyl-CoA synthetase family member 2, mitochondrial
297	A0A1B0C9C9	Uncharacterized protein	ACSF2_DANRE	56.94	3e-17	Acsf2	Acyl-CoA synthetase family member 2, mitochondrial
298	A0A1B0C9D0	Uncharacterized protein	ACSF2_DANRE	33.77	1e-25	Acsf2	Acyl-CoA synthetase family member 2, mitochondrial
299	A0A1B0C9D1	Uncharacterized protein	ACSF2_DANRE	40.27	1e-31	Acsf2	Acyl-CoA synthetase family member 2, mitochondrial
300	A0A1B0C9D2	Uncharacterized protein	PREL_DROME	51.75	2e-74	Prel	Protein preli-like
301	A0A1B0C9D3	Uncharacterized protein	RPC8_DICDI	34.98	3e-42	Rpc8	DNA-directed RNA polymerase III subunit rpc8
302	A0A1B0C9D4	Uncharacterized protein	RPC8_DICDI	34.98	1e-41	Rpc8	DNA-directed RNA polymerase III subunit rpc8
303	A0A1B0C9D5	Uncharacterized protein	YKK7_CAEEL	34.51	2e-07	Ykk7	Uncharacterized F-box/LRR-repeat protein C02F5.7
304	A0A1B0C9D7	Uncharacterized protein	DYI3_HELCR	41.18	7e-144	Dyi3	Dynein intermediate chain 3, ciliary
305	A0A1B0C9D9	Uncharacterized protein	NR2E1_ORYLA	40	1e-18	Nr2e1	Nuclear receptor subfamily 2 group E member 1
306	A0A1B0C9E2	Uncharacterized protein	TMM68_CHICK	46.07	6e-83	Tmm68	Transmembrane protein 68
307	A0A1B0C9E3	Uncharacterized protein	GRM_DROME	41.07	0	Mglur	Metabotropic glutamate receptor
308	A0A1B0C9E4	Uncharacterized protein	MAL1_DROME	62.76	1e-148	Mal1	Maltase A1
309	A0A1B0C9E5	Uncharacterized protein	ARSK_CHICK	24.46	3e-25	Arsk	Arylsulfatase K
310	A0A1B0C9E7	Uncharacterized protein	NDX6_CAEEL	46.32	7e-75	Ndx6	Putative nudix hydrolase 6
311	A0A1B0C9E8	Uncharacterized protein	YR75_CAEEL	48.89	8e-06	Yr75	Uncharacterized protein F43C1.5
312	A0A1B0C9F0	Uncharacterized protein	EFTU_RECAM	34.32	6e-40	Tufa	Elongation factor Tu, mitochondrial
313	A0A1B0C9F5	Uncharacterized protein	FPPS_CHICK	39.55	1e-65	Fdps	Farnesyl pyrophosphate synthase
314	A0A1B0C9F6	Uncharacterized protein	BAGS_BOMMO	43.21	1e-07	Samui	BAG domain-containing protein Samui
315	A0A1B0C9F7	Uncharacterized protein	DS22B_DANRE	55.84	4e-57	Ds22b	Dual specificity protein phosphatase 22-B
316	A0A1B0C9F9	Uncharacterized protein	ZIG8_CAEEL	26.15	4e-16	Zig8	Zwei Ig domain protein zig-8
317	A0A1B0C9G0	Uncharacterized protein	RAB14_CHICK	89.26	4e-78	Rab14	Ras-related protein Rab-14
318	A0A1B0C9G2	Uncharacterized protein	TAG52_CAEEL	28.88	7e-28	Tag52	Putative protein tag-52
319	A0A1B0C9G4	Uncharacterized protein	C1139_DROME	55.95	5e-30	C1139	Proton-coupled amino acid transporter-like protein CG1139
320	A0A1B0C9G5	Uncharacterized protein	NOCT_XENLA	44.82	1e-89	Noct	Nocturnin
321	A0A1B0C9G7	Uncharacterized protein	NOC_DROME	48.73	1e-67	Noc	Zinc finger protein Noc
322	A0A1B0C9G8	Uncharacterized protein	NOC_DROME	60.62	1e-50	Noc	Zinc finger protein Noc
323	A0A1B0C9G9	Uncharacterized protein	RM37_CHICK	21.58	2e-07	Rm37	39S ribosomal protein L37, mitochondrial
324	A0A1B0C9H2	Uncharacterized protein	ANM1_XENTR	52.38	1e-22	Anm1	Protein arginine N-methyltransferase 1
325	A0A1B0C9H6	Uncharacterized protein	ETFB_DICDI	60.16	5e-100	Etfb	Electron transfer flavoprotein subunit beta
326	A0A1B0C9H9	Uncharacterized protein	RYAR_DROME	50.79	2e-35	Ryar	RYamide receptor
327	A0A1B0C9I0	Uncharacterized protein	SPZ_DROME	33.76	4e-25	Spz	Protein spaetzle
328	A0A1B0C9I1	Uncharacterized protein	CUO6_BLACR	39.13	6e-07	Cuo6	Cuticle protein 6
329	A0A1B0C9I4	Uncharacterized protein	GCST_CHICK	23.58	4e-10	Gcst	Aminomethyltransferase, mitochondrial
330	A0A1B0C9I5	Uncharacterized protein	S26A9_XENTR	34.43	1e-22	S26a9	Solute carrier family 26 member 9
331	A0A1B0C9I7	Uncharacterized protein	ZIG8_CAEEL	32.76	3e-07	Zig8	Zwei Ig domain protein zig-8
332	A0A1B0C9I8	Uncharacterized protein	MYOM_DICDI	28.85	3e-06	Myom	Myosin-M heavy chain
333	A0A1B0C9J0	Uncharacterized protein	RB18B_DANRE	64.39	9e-92	Rb18b	Ras-related protein Rab-18-B
334	A0A1B0C9J4	Uncharacterized protein	FUMH_DANRE	77.42	0	Fumh	Fumarate hydratase, mitochondrial
335	A0A1B0C9J6	Uncharacterized protein	MYCBP_DROME	30.36	2e-11	Mycbp	c-Myc-binding protein homolog
336	A0A1B0C9J7	Uncharacterized protein	RM51_DROPS	59.66	2e-67	Rm51	39S ribosomal protein L51, mitochondrial
337	A0A1B0C9J8	Uncharacterized protein	RPF2_DROME	62.15	1e-107	Rpf2	Ribosome production factor 2 homolog
338	A0A1B0C9J9	Uncharacterized protein	ORCT_DROME	35.5	3e-110	Orct	Organic cation transporter protein
339	A0A1B0C9K1	Uncharacterized protein	ORCT_DROME	34.3	6e-53	Orct	Organic cation transporter protein
340	A0A1B0C9K4	Uncharacterized protein	ORCT_DROME	34.89	1e-80	Orct	Organic cation transporter protein
341	A0A1B0C9K7	Uncharacterized protein	PSD11_DROME	86.86	7e-141	Rpn6	26S proteasome non-ATPase regulatory subunit 11
342	A0A1B0C9K8	Uncharacterized protein	SRA_DROME	70.8	7e-103	Sra	Protein sarah
343	A0A1B0C9K9	Uncharacterized protein	ORCT_DROME	36.4	4e-101	Orct	Organic cation transporter protein
344	A0A1B0C9L0	Uncharacterized protein	MOT10_DANRE	43.18	3e-113	Mot10	Monocarboxylate transporter 10
345	A0A1B0C9L1	Uncharacterized protein	MOT10_DANRE	40	1e-19	Mot10	Monocarboxylate transporter 10
346	A0A1B0C9L2	Uncharacterized protein	UFL1_AEDAE	58.48	0	Ufl1	E3 UFM1-protein ligase 1 homolog
347	A0A1B0C9L3	Uncharacterized protein	SAE1_XENTR	42.77	5e-96	Sae1	SUMO-activating enzyme subunit 1
348	A0A1B0C9L6	Uncharacterized protein	DHRS7_DROME	30.8	9e-27	Dhrs7	Dehydrogenase/reductase SDR family protein 7-like
349	A0A1B0C9L8	Uncharacterized protein	FAF_DROME	69.73	0	Faf	Probable ubiquitin carboxyl-terminal hydrolase FAF
350	A0A1B0C9M0	Uncharacterized protein	DAPLE_XENLA	26.54	9e-32	Daple	Daple-like protein
351	A0A1B0C9M1	Uncharacterized protein	ASGL1_XENLA	36.68	4e-34	Asgl1	Isoaspartyl peptidase/L-asparaginase
352	A0A1B0C9M2	Uncharacterized protein	EEPD1_XENLA	36.95	2e-26	Eepd1	Endonuclease/exonuclease/phosphatase family domain-containing protein 1
353	A0A1B0C9M5	Uncharacterized protein	ABCGM_DICDI	40.12	2e-27	Abcgm	ABC transporter G family member 22
354	A0A1B0C9M6	Uncharacterized protein	WHITE_LUCCU	28.02	7e-25	White	Protein white
355	A0A1B0C9M7	Uncharacterized protein	HCDH2_CAEEL	54.22	2e-120	Hcdh2	Probable 3-hydroxyacyl-CoA dehydrogenase B0272.3
356	A0A1B0C9M8	Uncharacterized protein	HCDH2_CAEEL	64.1	2e-30	Hcdh2	Probable 3-hydroxyacyl-CoA dehydrogenase B0272.3
357	A0A1B0C9N0	Uncharacterized protein	M2OM_CAEEL	65.31	2e-134	M2om	Mitochondrial 2-oxoglutarate/malate carrier protein
358	A0A1B0C9N1	Uncharacterized protein	MTG16_CHICK	42.77	5e-30	Mtg16	Protein CBFA2T3
359	A0A1B0C9N2	Uncharacterized protein	FAXC_DROME	76.98	3e-73	Fax	Failed axon connections
360	A0A1B0C9N3	Uncharacterized protein	FAXC_DROME	56.52	9e-26	Fax	Failed axon connections
361	A0A1B0C9N4	Uncharacterized protein	CANC_DROME	56.43	6e-92	Canc	Calpain-C
362	A0A1B0C9N5	Uncharacterized protein	GLT25_AEDAE	58.69	0	Glt25	Glycosyltransferase 25 family member
363	A0A1B0C9N6	Uncharacterized protein	PSMD7_DROME	84.5	0	Rpn8	26S proteasome non-ATPase regulatory subunit 7
364	A0A1B0C9N7	Uncharacterized protein	TPP2_DROME	29.67	9e-12	Tppii	Tripeptidyl-peptidase 2
365	A0A1B0C9N8	Uncharacterized protein	RT25_DROME	66.47	6e-88	Rt25	Probable 28S ribosomal protein S25, mitochondrial
366	A0A1B0C9N9	Uncharacterized protein	AKTIP_ANOGA	41.42	9e-47	Aktip	Protein crossbronx homolog
367	A0A1B0C9P2	Uncharacterized protein	HDM_DROME	29.8	1e-60	Hdm	Protein hold'em
368	A0A1B0C9P6	Uncharacterized protein	GNAO_GEOCY	50.7	6e-128	Gnao	Guanine nucleotide-binding protein G(o) subunit alpha
369	A0A1B0C9P8	Uncharacterized protein	BCAR3_XENLA	37	6e-52	Bcar3	Breast cancer anti-estrogen resistance protein 3 homolog
370	A0A1B0C9P9	Uncharacterized protein	CDGAP_DROME	46.06	0	Cdgap	GTPase-activating protein CdGAPr
371	A0A1B0C9Q0	Uncharacterized protein	NBN_DANRE	32.4	5e-44	Nbn	Nibrin
372	A0A1B0C9Q1	Uncharacterized protein	Y1760_DROME	24.15	3e-13	Y1760	Probable G-protein coupled receptor CG31760
373	A0A1B0C9Q3	Uncharacterized protein	PDXD1_DANRE	33.48	3e-101	Pdxd1	Pyridoxal-dependent decarboxylase domain-containing protein 1
374	A0A1B0C9Q5	Uncharacterized protein	CP305_DROME	40.46	1e-126	Cp305	Probable cytochrome P450 305a1
375	A0A1B0C9Q6	Uncharacterized protein	PP4RS_CAEEL	30.5	1e-32	Pp4rs	Serine/threonine-protein phosphatase 4 regulatory subunit ppfr-4
376	A0A1B0C9Q7	Uncharacterized protein	PPCE_DICDI	37.47	3e-151	Prep	Prolyl endopeptidase
377	A0A1B0C9R0	Uncharacterized protein	S39A9_XENTR	53.31	6e-89	S39a9	Zinc transporter ZIP9
378	A0A1B0C9R2	Uncharacterized protein	TTL12_CAEEL	42.31	4e-81	Ttl12	Tubulin--tyrosine ligase-like protein 12
379	A0A1B0C9R4	Uncharacterized protein	FPPS_CHICK	38.76	2e-75	Fdps	Farnesyl pyrophosphate synthase
380	A0A1B0C9R5	Uncharacterized protein	FPPS_CHICK	39.45	2e-52	Fdps	Farnesyl pyrophosphate synthase
381	A0A1B0C9S1	Uncharacterized protein	PRKAA_XENLA	25.14	8e-09	Prkaa	Interferon-inducible double-stranded RNA-dependent protein kinase activator A homolog A
382	A0A1B0C9S2	Uncharacterized protein	MCFX_DICDI	26.67	4e-08	Mcfx	Mitochondrial substrate carrier family protein X
383	A0A1B0C9S9	Uncharacterized protein	TRIO_DANRE	26.28	4e-20	Trio	Triple functional domain protein
384	A0A1B0C9T0	Uncharacterized protein	YCF2E_CAEEL	37.66	1e-19	Ycf2e	Uncharacterized peptidase C1-like protein F26E4.3
385	A0A1B0C9T3	Uncharacterized protein	DPF1_CAEEL	39.89	5e-33	Dpf1	Dipeptidyl peptidase family member 1
386	A0A1B0C9T4	Uncharacterized protein	SP88E_DROME	44.97	3e-43	Sp88e	Serine protease inhibitor 88Ea
387	A0A1B0C9T6	Uncharacterized protein	PKHA7_DANRE	27.88	3e-06	Pkha7	Pleckstrin homology domain-containing family A member 7
388	A0A1B0C9T7	Uncharacterized protein	TRI23_CAEEL	28.81	9e-09	Tri23	E3 ubiquitin-protein ligase arc-1
389	A0A1B0C9T8	Uncharacterized protein	PAR1_CAEBR	30.11	3e-08	Par1	Serine/threonine-protein kinase par-1
390	A0A1B0C9U0	Uncharacterized protein	GCK3_CAEEL	56.22	0	Gck3	Germinal center kinase 3
391	A0A1B0C9U1	Uncharacterized protein	RENT1_CAEEL	30.94	3e-06	Rent1	Regulator of nonsense transcripts 1
392	A0A1B0C9U2	Uncharacterized protein	DBR1_DROME	58.69	7e-169	Ldbr	Lariat debranching enzyme
393	A0A1B0C9U3	Uncharacterized protein	BTF3_CAEEL	49.12	9e-11	Btf3	Transcription factor BTF3 homolog
394	A0A1B0C9U4	Uncharacterized protein	SPF30_DANRE	45.5	6e-41	Spf30	Survival of motor neuron-related-splicing factor 30
395	A0A1B0C9U5	Uncharacterized protein	NU301_DROME	47.69	0	Nu301	Nucleosome-remodeling factor subunit NURF301
396	A0A1B0C9U6	Uncharacterized protein	RXRA_XENLA	32.6	4e-30	Rxra	Retinoic acid receptor RXR-alpha
397	A0A1B0C9U7	Uncharacterized protein	NKX63_XENLA	46.15	2e-05	Nkx63	Homeobox protein Nkx-6.3
398	A0A1B0C9V0	Uncharacterized protein	DTBP1_DROME	37.72	6e-57	Dtbp1	Dysbindin protein homolog
399	A0A1B0C9V1	Uncharacterized protein	VDPP4_APIME	27.09	3e-60	Vdpp4	Venom dipeptidyl peptidase 4
400	A0A1B0C9V2	Uncharacterized protein	SORL_CHICK	34.18	0	Sorl1	Sortilin-related receptor
401	A0A1B0C9V3	Uncharacterized protein	HERC2_DROME	33.71	1e-08	Herc2	Probable E3 ubiquitin-protein ligase HERC2
402	A0A1B0C9V4	Uncharacterized protein	PRLA_DICDI	43.39	5e-97	Prla	Proliferation-associated protein A
403	A0A1B0C9V6	Uncharacterized protein	OGT1_CAEEL	31.07	7e-07	Ogt1	UDP-N-acetylglucosamine--peptide N-acetylglucosaminyltransferase
404	A0A1B0C9V7	Uncharacterized protein	OGT1_CAEEL	28.75	2e-06	Ogt1	UDP-N-acetylglucosamine--peptide N-acetylglucosaminyltransferase
405	A0A1B0C9V8	Uncharacterized protein	ZFH1_DROME	53.73	3e-13	Zfh1	Zinc finger protein 1
406	A0A1B0C9W1	Uncharacterized protein	ADX_CHICK	57.52	7e-41	Fdx1	Adrenodoxin, mitochondrial
407	A0A1B0C9W3	Uncharacterized protein	IMPL2_DROME	41.86	2e-06	Impl2	Neural/ectodermal development factor IMP-L2
408	A0A1B0C9W4	Uncharacterized protein	MARF_DROME	68.47	0	Marf	Transmembrane GTPase Marf
409	A0A1B0C9W7	Uncharacterized protein	ASCC3_CHICK	57.62	0	Ascc3	Activating signal cointegrator 1 complex subunit 3
410	A0A1B0C9W8	Uncharacterized protein	ALG2_DICDI	45.2	1e-64	Alg2	Alpha-1,3/1,6-mannosyltransferase ALG2
411	A0A1B0C9W9	Uncharacterized protein	DICH_DROME	65.22	6e-94	Dich	SOX domain-containing protein dichaete
412	A0A1B0C9X1	Uncharacterized protein	CBPB_ASTAS	30.95	2e-52	Cbpb	Carboxypeptidase B
413	A0A1B0C9X2	Uncharacterized protein	UXS1_XENTR	62.17	0	Uxs1	UDP-glucuronic acid decarboxylase 1
414	A0A1B0C9X5	Uncharacterized protein	RRF2M_DROGR	53.61	0	Rrf2m	Ribosome-releasing factor 2, mitochondrial
415	A0A1B0C9X6	Uncharacterized protein	CYP1_BRUMA	46.28	6e-89	Cyp1	Peptidyl-prolyl cis-trans isomerase 1
416	A0A1B0C9X7	Uncharacterized protein	YNE7_CAEEL	37.54	2e-70	Yne7	Uncharacterized sugar kinase R08D7.7
417	A0A1B0C9X8	Uncharacterized protein	PATL1_DANRE	27.88	7e-22	Patl1	Protein PAT1 homolog 1
418	A0A1B0C9Y1	Uncharacterized protein	CF2_DROME	34.07	4e-15	Cf2	Chorion transcription factor Cf2
419	A0A1B0C9Y2	Uncharacterized protein	FEM1B_DROME	40.72	3e-159	Fem1b	Protein fem-1 homolog B
420	A0A1B0C9Y3	Uncharacterized protein	SMA10_CAEEL	24.53	5e-10	Sma10	Leucine-rich repeats and immunoglobulin-like domains protein sma-10
421	A0A1B0C9Y5	Uncharacterized protein	MYO7A_AEDAE	30.26	1e-35	Myo7a	Myosin-VIIa
422	A0A1B0C9Y6	Uncharacterized protein	SUH_DROME	91.08	0	Suh	Suppressor of hairless protein
423	A0A1B0C9Y7	Uncharacterized protein	SUH_DROME	90.36	0	Suh	Suppressor of hairless protein
424	A0A1B0C9Y9	Uncharacterized protein	SKY_DROME	72.33	9e-76	Sky	GTPase-activating protein skywalker
425	A0A1B0C9Z0	Uncharacterized protein	ADH1_CERCO	35.66	5e-18	Adh1	Alcohol dehydrogenase 1
426	A0A1B0C9Z1	Uncharacterized protein	HAOX_DICDI	43.37	3e-41	Haox	Hydroxyacid oxidase
427	A0A1B0C9Z2	Uncharacterized protein	MLP2_DROME	53.42	2e-17	Mlp2	Muscle LIM protein Mlp84B
428	A0A1B0C9Z3	Uncharacterized protein	ST1B1_CHICK	33.33	2e-38	St1b1	Sulfotransferase family cytosolic 1B member 1
429	A0A1B0C9Z4	Uncharacterized protein	SKEL2_DROME	41.67	2e-20	Skel2	Protein Skeletor, isoforms D/E
430	A0A1B0C9Z5	Uncharacterized protein	STUB_DROME	33.92	2e-40	Stub	Serine proteinase stubble
431	A0A1B0C9Z7	Uncharacterized protein	TM267_XENLA	36.36	3e-24	Tm267	Transmembrane protein 267
432	A0A1B0C9Z9	Uncharacterized protein	FPPS_CHICK	40.32	4e-50	Fdps	Farnesyl pyrophosphate synthase
433	A0A1B0CA00	Uncharacterized protein	PEX1_DICDI	24.39	6e-06	Pex1	Peroxisome biogenesis factor 1
434	A0A1B0CA02	Uncharacterized protein	FAT_DROME	29.03	4e-06	Fat	Cadherin-related tumor suppressor
435	A0A1B0CA05	Uncharacterized protein	MOB2_DROPS	90.81	3e-120	Mob2	MOB kinase activator-like 2
436	A0A1B0CA12	Uncharacterized protein	CCH2R_DROME	56.34	6e-44	Cch2r	Neuropeptide CCHamide-2 receptor
437	A0A1B0CA15	Uncharacterized protein	SYIC_CAEEL	56.53	0	Syic	Isoleucine--tRNA ligase, cytoplasmic
438	A0A1B0CA16	Uncharacterized protein	IF2G_DROME	87.5	5e-34	If2g	Eukaryotic translation initiation factor 2 subunit 3
439	A0A1B0CA17	Uncharacterized protein	ATPO_DROME	59.72	1e-84	Atpo	ATP synthase subunit O, mitochondrial
440	A0A1B0CA18	Uncharacterized protein	HTH_DROME	95.45	2e-19	Hth	Homeobox protein homothorax
441	A0A1B0CA20	Uncharacterized protein	RPP30_DICDI	27.78	2e-14	Rpp30	Ribonuclease P protein subunit drpp30
442	A0A1B0CA22	Uncharacterized protein	H32_XENTR	84.92	2e-66	H32	Histone H3.2
443	A0A1B0CA23	Uncharacterized protein	CND2_XENLA	24.68	7e-26	Ncaph	Condensin complex subunit 2
444	A0A1B0CA24	Uncharacterized protein	U184_AEDAE	54.69	1e-12	U184	UPF0184 protein AAEL002161
445	A0A1B0CA25	Uncharacterized protein	Z652B_XENLA	34.48	8e-06	Z652b	Zinc finger protein 652-B
446	A0A1B0CA28	Uncharacterized protein	DHTK1_DROME	58.83	0	Dhtk1	Probable 2-oxoglutarate dehydrogenase E1 component DHKTD1 homolog, mitochondrial
447	A0A1B0CA29	Uncharacterized protein	DNJC7_DICDI	51	2e-20	Dnjc7	DnaJ homolog subfamily C member 7 homolog
448	A0A1B0CA30	Uncharacterized protein	BTB6A_DANRE	26.75	7e-23	Btb6a	BTB/POZ domain-containing protein 6-A
449	A0A1B0CA31	Uncharacterized protein	SPEN_DROME	81.29	4e-88	Spen	Protein split ends
450	A0A1B0CA34	Uncharacterized protein	JMJD6_DROME	72.26	0	Psr	Bifunctional arginine demethylase and lysyl-hydroxylase PSR
451	A0A1B0CA37	Uncharacterized protein	BRC4_DROME	43.4	4e-08	Brc4	Broad-complex core protein isoform 6
452	A0A1B0CA38	Uncharacterized protein	YF64_CAEEL	50.16	3e-91	Yf64	Uncharacterized protein R102.4
453	A0A1B0CA40	Uncharacterized protein	MGP2_DICDI	43.78	1e-37	Mgp2	Mental retardation GTPase activating protein homolog 2
454	A0A1B0CA41	Uncharacterized protein	LDP1_CAEEL	36.59	3e-88	Ldp1	Lipid droplet localized protein
455	A0A1B0CA42	Uncharacterized protein	RETM_AEDAE	64.64	0	Retm	Protein real-time
456	A0A1B0CA45	Uncharacterized protein	RNF13_CHICK	38.75	8e-68	Rnf13	E3 ubiquitin-protein ligase RNF13
457	A0A1B0CA46	Uncharacterized protein	GRAU_DROME	31.85	3e-43	Grau	Transcription factor grauzone
458	A0A1B0CA47	Uncharacterized protein	TTC25_DANRE	40.82	9e-25	Ttc25	Tetratricopeptide repeat protein 25
459	A0A1B0CA49	Uncharacterized protein	SING_DROME	85.38	0	Sing	Protein singed
460	A0A1B0CA52	Uncharacterized protein	NFYB_CHICK	63.89	3e-59	Nfyb	Nuclear transcription factor Y subunit beta
461	A0A1B0CA54	Uncharacterized protein	NLGN1_CAEEL	49.02	5e-09	Nlgn1	Neuroligin-1
462	A0A1B0CA55	Uncharacterized protein	ISWI_DROME	78.79	0	Iswi	Chromatin-remodeling complex ATPase chain Iswi
463	A0A1B0CA57	Uncharacterized protein	RESIL_DROME	50	1e-08	Resil	Pro-resilin
464	A0A1B0CA59	Uncharacterized protein	DRK_DROSI	60.77	3e-48	Drk	Protein E(sev)2B
465	A0A1B0CA60	Uncharacterized protein	BBS7_CAEEL	30.81	6e-48	Bbs7	Bardet-Biedl syndrome 7 protein homolog
466	A0A1B0CA61	Uncharacterized protein	ALKB8_XENTR	44.82	2e-88	Alkb8	Alkylated DNA repair protein alkB homolog 8
467	A0A1B0CA63	Uncharacterized protein	CP190_DROME	40.45	8e-147	Cp190	Centrosome-associated zinc finger protein CP190
468	A0A1B0CA64	Uncharacterized protein	EAF3_DROME	50.38	1e-31	Mrg15	NuA4 complex subunit EAF3 homolog
469	A0A1B0CA65	Uncharacterized protein	TPM_LOCMI	94.12	2e-42	Tpm	Tropomyosin
470	A0A1B0CA66	Uncharacterized protein	TPM2_DROME	77.34	1e-124	Tm2	Tropomyosin-2
471	A0A1B0CA67	Uncharacterized protein	SY65_DROME	36.13	2e-14	Syt1	Synaptotagmin 1
472	A0A1B0CA68	Uncharacterized protein	SP15_TETCF	26.16	3e-38	Sp15	SITS-binding protein
473	A0A1B0CA70	Uncharacterized protein	RN_DROME	64.47	3e-36	Rn	Zinc finger protein rotund
474	A0A1B0CA71	Uncharacterized protein	LRP8_CHICK	52.94	0.0005	Lrp8	Low-density lipoprotein receptor-related protein 8
475	A0A1B0CA72	Uncharacterized protein	MODSP_DROME	28.39	2e-08	Modsp	Modular serine protease
476	A0A1B0CA73	Uncharacterized protein	SEM2A_DROME	81.72	0	Sem2a	Semaphorin-2A
477	A0A1B0CA74	Uncharacterized protein	GNRHR_OCTVU	33.33	3e-22	Gnrhr	Gonadotropin-releasing hormone receptor
478	A0A1B0CA77	Uncharacterized protein	NCBP1_DROME	84.94	0	Cbp80	Nuclear cap-binding protein subunit 1
479	A0A1B0CA78	Uncharacterized protein	GKP1B_XENLA	25.1	4e-07	Gkp1b	G kinase-anchoring protein 1-B
480	A0A1B0CA83	Uncharacterized protein	BAZ2B_CHICK	60	5e-13	Baz2b	Bromodomain adjacent to zinc finger domain protein 2B
481	A0A1B0CA85	Uncharacterized protein	SC5A8_DANRE	41.67	1e-99	Sc5a8	Sodium-coupled monocarboxylate transporter 1
482	A0A1B0CA88	Uncharacterized protein	TSN9_SALSA	27.36	3e-08	Tsn9	Tetraspanin-9
483	A0A1B0CA91	Uncharacterized protein	OSA_DROME	60.57	5e-159	Osa	Trithorax group protein osa
484	A0A1B0CA93	Uncharacterized protein	RL44_OCHTR	89.29	3e-49	Rpl44	60S ribosomal protein L44
485	A0A1B0CA94	Uncharacterized protein	WASC3_DROME	56.13	1e-47	Wasc3	WASH complex subunit 3
486	A0A1B0CA95	Uncharacterized protein	TORSO_BOMMO	38.89	7e-60	Torso	Tyrosine-protein kinase receptor torso
487	A0A1B0CA96	Uncharacterized protein	NESD_DROME	25.91	1e-52	Nesd	Protein nessun dorma
488	A0A1B0CA97	Uncharacterized protein	UNC36_CAEEL	20.81	5e-21	Unc36	Voltage-dependent calcium channel unc-36
489	A0A1B0CA98	Uncharacterized protein	ROST_DROME	29.91	1e-26	Rost	Protein rolling stone
490	A0A1B0CA99	Uncharacterized protein	GPRK2_DROME	74.39	2e-79	Gprk2	G protein-coupled receptor kinase 2
491	A0A1B0CAA0	Uncharacterized protein	TRM11_XENLA	41.89	4e-129	Trm11	tRNA (guanine(10)-N2)-methyltransferase homolog
492	A0A1B0CAA2	Uncharacterized protein	ORC2_DROME	54.6	0	Orc2	Origin recognition complex subunit 2
493	A0A1B0CAA7	Uncharacterized protein	1433Z_DROME	98.28	2e-32	1433z	14-3-3 protein zeta
494	A0A1B0CAB3	Uncharacterized protein	UNC13_CAEEL	41.23	4e-37	Unc13	Phorbol ester/diacylglycerol-binding protein unc-13
495	A0A1B0CAB4	Uncharacterized protein	SUP9_CAEEL	57.93	3e-112	Sup9	Two pore potassium channel protein sup-9
496	A0A1B0CAB6	Uncharacterized protein	CCND1_DANRE	54.37	4e-31	Ccnd1	G1/S-specific cyclin-D1
497	A0A1B0CAB7	Uncharacterized protein	LVA_DROME	26.46	1e-07	Lva	Protein lava lamp
498	A0A1B0CAB8	Uncharacterized protein	RDGB_DROME	67.62	0	Rdgb	Protein retinal degeneration B
499	A0A1B0CAC2	Uncharacterized protein	MINY3_DROME	49.2	2e-95	Miny3	Ubiquitin carboxyl-terminal hydrolase MINDY-3 homolog
500	A0A1B0CAC3	Uncharacterized protein	MSPS_DROME	64.3	0	Msps	Protein mini spindles
501	A0A1B0CAC6	Uncharacterized protein	ARIP4_XENTR	32.65	7e-122	Arip4	Helicase ARIP4
502	A0A1B0CAC8	Uncharacterized protein	ECH1_DICDI	32.96	1e-42	Ech1	Delta(3,5)-Delta(2,4)-dienoyl-CoA isomerase, mitochondrial
503	A0A1B0CAC9	Uncharacterized protein	CBPC6_CAEEL	37.88	5e-87	Cbpc6	Cytosolic carboxypeptidase 6
504	A0A1B0CAD0	Uncharacterized protein	MSH2_DROME	53.98	0	Spel1	DNA mismatch repair protein spellchecker 1
505	A0A1B0CAD3	Uncharacterized protein	ATPD_CAEEL	45.91	9e-37	Atpd	ATP synthase subunit delta, mitochondrial
506	A0A1B0CAD6	Uncharacterized protein	NOP53_DROME	38.12	2e-73	Nop53	Ribosome biogenesis protein NOP53
507	A0A1B0CAD8	Uncharacterized protein	TNNI_DROME	81	1e-80	Wupa	Troponin I
508	A0A1B0CAD9	Uncharacterized protein	SY63_DIPOM	33.46	2e-37	Sy63	Synaptotagmin-C
509	A0A1B0CAE0	Uncharacterized protein	DMTA2_DANRE	71.43	1e-26	Dmta2	Doublesex- and mab-3-related transcription factor A2
510	A0A1B0CAE1	Uncharacterized protein	DMTA2_DANRE	64.91	5e-24	Dmta2	Doublesex- and mab-3-related transcription factor A2
511	A0A1B0CAE2	Uncharacterized protein	PDFR_DROME	52.05	1e-53	Pdfr	PDF receptor
512	A0A1B0CAE4	Uncharacterized protein	GAD1_DROME	68.31	2e-105	Gad1	Gastrulation defective protein 1 homolog
513	A0A1B0CAE5	Uncharacterized protein	NXT1_DROME	55.65	2e-43	Nxt1	NTF2-related export protein
514	A0A1B0CAE6	Uncharacterized protein	ZG7_XENLA	34.51	6e-14	Zg7	Gastrula zinc finger protein XlCGF7.1
515	A0A1B0CAE8	Uncharacterized protein	ALRA_DICDI	25.13	8e-09	Alra	Aldose reductase A
516	A0A1B0CAE9	Uncharacterized protein	PDZ11_CHICK	39.74	1e-07	Pdz11	PDZ domain-containing protein 11
517	A0A1B0CAF0	Uncharacterized protein	MCE1_DANRE	48.44	7e-15	Rngtt	mRNA-capping enzyme
518	A0A1B0CAF3	Uncharacterized protein	RA51A_XENLA	74.48	0	Ra51a	DNA repair protein RAD51 homolog A
519	A0A1B0CAF5	Uncharacterized protein	SYEP_DROME	60.52	0	Syep	Bifunctional glutamate/proline--tRNA ligase
520	A0A1B0CAF6	Uncharacterized protein	CUTA_XENLA	56.41	1e-42	Cuta	Protein CutA homolog
521	A0A1B0CAF7	Uncharacterized protein	SERHL_DANRE	33.22	6e-56	Serhl	Serine hydrolase-like protein
522	A0A1B0CAF8	Uncharacterized protein	KKCC_CAEEL	51.56	7e-128	Kkcc	Calcium/calmodulin-dependent protein kinase kinase
523	A0A1B0CAF9	Uncharacterized protein	BNIP3_CAEBR	23.59	8e-06	Bnip3	BNIP3 homolog
524	A0A1B0CAG0	Uncharacterized protein	INT12_DROME	36.17	8e-28	Int12	Integrator complex subunit 12
525	A0A1B0CAG3	Uncharacterized protein	OBP72_ANOGA	35.25	4e-28	Obp72	General odorant-binding protein 72
526	A0A1B0CAG6	Uncharacterized protein	CP9E2_BLAGE	32.4	4e-60	Cp9e2	Cytochrome P450 9e2
527	A0A1B0CAG9	Uncharacterized protein	MSTAB_DROME	30.68	1e-21	Mstab	SET domain-containing protein SmydA-8, isoform B
528	A0A1B0CAH0	Uncharacterized protein	TTC8_CAEEL	35.97	7e-84	Ttc8	Tetratricopeptide repeat protein 8
529	A0A1B0CAH2	Uncharacterized protein	KDM4B_DROME	65.83	0	Kdm4b	Probable lysine-specific demethylase 4B
530	A0A1B0CAH3	Uncharacterized protein	CL190_DROME	42.2	5e-35	Cl190	Restin homolog
531	A0A1B0CAH4	Uncharacterized protein	RPB11_DROME	92.31	4e-77	Rpb11	DNA-directed RNA polymerase II subunit RPB11
532	A0A1B0CAH6	Uncharacterized protein	XYLK_DROME	42.86	2e-63	Xylk	Glycosaminoglycan xylosylkinase homolog
533	A0A1B0CAH8	Uncharacterized protein	BORC5_CHICK	37.69	3e-21	Borc5	BLOC-1-related complex subunit 5
534	A0A1B0CAI0	Uncharacterized protein	S26A9_XENTR	23.95	7e-28	S26a9	Solute carrier family 26 member 9
535	A0A1B0CAI2	Uncharacterized protein	DESI1_XENLA	49.32	5e-52	Desi1	Desumoylating isopeptidase 1
536	A0A1B0CAI3	Uncharacterized protein	KIBRA_DROMO	51.89	0	Kibra	Protein kibra
537	A0A1B0CAI4	Uncharacterized protein	HIL_DROME	89.53	0	Hil	Hillarin
538	A0A1B0CAI5	Uncharacterized protein	HNRPK_CHICK	45.39	2e-27	Hnrpk	Heterogeneous nuclear ribonucleoprotein K
539	A0A1B0CAI8	Uncharacterized protein	TAF6_DROME	69.44	2e-126	Taf6	Transcription initiation factor TFIID subunit 6
540	A0A1B0CAI9	Uncharacterized protein	L259_DROME	25.46	1e-14	L259	Probable multidrug resistance-associated protein lethal(2)03659
541	A0A1B0CAJ0	Uncharacterized protein	METL9_CHICK	38.91	3e-40	Metl9	Methyltransferase-like protein 9
542	A0A1B0CAK0	Uncharacterized protein	NPL4_DROME	60.1	3e-70	Npl4	Nuclear protein localization protein 4 homolog
543	A0A1B0CAK1	Uncharacterized protein	PIP1_DROME	70.63	4e-60	Pip1	1-phosphatidylinositol 4,5-bisphosphate phosphodiesterase classes I and II
544	A0A1B0CAK3	Uncharacterized protein	NU154_DROME	44.73	0	Nu154	Nuclear pore complex protein Nup154
545	A0A1B0CAK4	Uncharacterized protein	NSA2_DICDI	66.67	2e-110	Nsa2	Ribosome biogenesis protein NSA2 homolog
546	A0A1B0CAK5	Uncharacterized protein	NSA2_DICDI	50.77	2e-13	Nsa2	Ribosome biogenesis protein NSA2 homolog
547	A0A1B0CAK6	Uncharacterized protein	FAT_DROME	27.85	1e-86	Fat	Cadherin-related tumor suppressor
548	A0A1B0CAM3	Uncharacterized protein	MMD4_DROME	42.86	6e-15	Mmd4	Modifier of mdg4
549	A0A1B0CAM4	Uncharacterized protein	ABH6A_XENLA	19.32	2e-07	Abh6a	Monoacylglycerol lipase abhd6-A
550	A0A1B0CAM5	Uncharacterized protein	SF3A1_DICDI	47.17	6e-10	Sf3a1	Probable splicing factor 3A subunit 1
551	A0A1B0CAM6	Uncharacterized protein	KL98A_DROME	57.15	0	Kl98a	Kinesin-like protein Klp98A
552	A0A1B0CAM7	Uncharacterized protein	MTTF_DROME	42.07	5e-85	Mttf	Transcription termination factor, mitochondrial
553	A0A1B0CAM8	Uncharacterized protein	DCAKD_DANRE	45.65	1e-64	Dcakd	Dephospho-CoA kinase domain-containing protein
554	A0A1B0CAM9	Uncharacterized protein	ISWI_DROME	43.99	0	Iswi	Chromatin-remodeling complex ATPase chain Iswi
555	A0A1B0CAN0	Uncharacterized protein	C1139_DROME	37.56	3e-100	C1139	Proton-coupled amino acid transporter-like protein CG1139
556	A0A1B0CAN3	Uncharacterized protein	ZNT9_XENLA	49.9	7e-169	Znt9	Zinc transporter 9
557	A0A1B0CAN4	Uncharacterized protein	ATRX_DROME	48.37	0	Xnp	Transcriptional regulator ATRX homolog
558	A0A1B0CAN5	Uncharacterized protein	INDY1_DROME	55.71	0	Indy	Protein I'm not dead yet
559	A0A1B0CAN7	Uncharacterized protein	BLM_DROME	42.75	0	Blm	Bloom syndrome protein homolog
560	A0A1B0CAN9	Uncharacterized protein	KPEL_DROME	41.28	1e-41	Pll	Serine/threonine-protein kinase pelle
561	A0A1B0CAP0	Uncharacterized protein	ACH4_DROME	82.35	2e-31	Ach4	Acetylcholine receptor subunit beta-like 2
562	A0A1B0CAP1	Uncharacterized protein	RAS2_DROME	83.16	3e-105	Ras2	Ras-like protein 2
563	A0A1B0CAP2	Uncharacterized protein	VSP_BOMIG	41.03	4e-82	Vsp	Venom serine protease Bi-VSP
564	A0A1B0CAP3	Uncharacterized protein	VSP_BOMIG	40.63	2e-77	Vsp	Venom serine protease Bi-VSP
565	A0A1B0CAP4	Uncharacterized protein	NAB_DROME	83.54	2e-34	Nab	NGFI-A-binding protein homolog
566	A0A1B0CAP9	Uncharacterized protein	NIPLB_DANRE	32.02	8e-12	Niplb	Nipped-B-like protein B
567	A0A1B0CAQ0	Uncharacterized protein	THADA_DROME	31.63	2e-64	Thada	Thyroid adenoma-associated protein homolog
568	A0A1B0CAQ2	Uncharacterized protein	GD_DROME	33.44	2e-48	Gd	Serine protease gd
569	A0A1B0CAQ3	Uncharacterized protein	GD_DROME	33.82	1e-47	Gd	Serine protease gd
570	A0A1B0CAQ5	Uncharacterized protein	Y4449_DROME	32.73	5e-19	Y4449	Uncharacterized protein CG4449
571	A0A1B0CAQ6	Uncharacterized protein	PAPD1_DROME	50.84	8e-177	Papd1	Poly(A) RNA polymerase, mitochondrial
572	A0A1B0CAQ7	Uncharacterized protein	GD_DROME	34.72	7e-40	Gd	Serine protease gd
573	A0A1B0CAQ8	Uncharacterized protein	GD_DROME	28.67	4e-11	Gd	Serine protease gd
574	A0A1B0CAR1	Uncharacterized protein	IASPP_CAEEL	46.43	2e-11	Iaspp	Apoptotic enhancer 1 protein
575	A0A1B0CAR3	Uncharacterized protein	CELF3_DANRE	65.62	4e-07	Celf3	CUGBP Elav-like family member 3
576	A0A1B0CAR4	Uncharacterized protein	ZN143_XENLA	32.81	8e-07	Zn143	Zinc finger protein 143
577	A0A1B0CAR5	Uncharacterized protein	DRI_DROME	34.15	3e-16	Retn	Protein dead ringer
578	A0A1B0CAR6	Uncharacterized protein	GALT2_DROME	88.12	5e-169	Galt2	Polypeptide N-acetylgalactosaminyltransferase 2
579	A0A1B0CAS0	Uncharacterized protein	DS_DROME	26.79	2e-15	Ds	Protein dachsous
580	A0A1B0CAS2	Uncharacterized protein	UNC71_CAEEL	35.41	3e-99	Unc71	Disintegrin and metalloproteinase domain-containing protein unc-71
581	A0A1B0CAS3	Uncharacterized protein	RBM46_XENTR	33.09	7e-46	Rbm46	Probable RNA-binding protein 46
582	A0A1B0CAS4	Uncharacterized protein	MYRO1_BREBR	42.22	8e-132	Myro1	Myrosinase 1
583	A0A1B0CAS5	Uncharacterized protein	ANKL1_CAEEL	27.86	9e-21	Ankl1	Ankyrin repeat and LEM domain-containing protein 1 homolog
584	A0A1B0CAS6	Uncharacterized protein	CCNB3_DROME	48.19	2e-156	Cycb3	G2/mitotic-specific cyclin-B3
585	A0A1B0CAS9	Uncharacterized protein	DDX17_DROME	64.37	0	Rm62	ATP-dependent RNA helicase p62
586	A0A1B0CAT0	Uncharacterized protein	RB27C_DROME	66.67	2e-166	Rb27c	Heterogeneous nuclear ribonucleoprotein 27C
587	A0A1B0CAT1	Uncharacterized protein	LAP1_DROME	32.61	1e-06	Lap1	Protein lap1
588	A0A1B0CAT2	Uncharacterized protein	LPHN_DROYA	73.53	5e-11	Lphn	Latrophilin Cirl
589	A0A1B0CAT3	Uncharacterized protein	LPHN_DROPS	68.06	9e-25	Lphn	Latrophilin Cirl
590	A0A1B0CAT4	Uncharacterized protein	DSH_DROME	79.01	5e-33	Dsh	Segment polarity protein dishevelled
591	A0A1B0CAT5	Uncharacterized protein	HCF_DROME	33.79	5e-83	Hcf	Host cell factor
592	A0A1B0CAT8	Uncharacterized protein	25KD_SARPE	34.9	7e-17	25kd	Development-specific 25 kDa protein
593	A0A1B0CAU0	Uncharacterized protein	IGDB2_CAEEL	25.78	6e-07	Igdb2	Ig-like and fibronectin type-III domain-containing protein 2
594	A0A1B0CAU3	Uncharacterized protein	AATR1_DICDI	23.64	5e-15	Aatr1	Aromatic amino acid aminotransferase DDB_G0272014
595	A0A1B0CAU4	Uncharacterized protein	FITM_DROME	59.38	5e-99	Fitm	FIT family protein CG10671
596	A0A1B0CAU5	Uncharacterized protein	FITM_DROME	45.12	4e-39	Fitm	FIT family protein CG10671
597	A0A1B0CAU6	Uncharacterized protein	SEPIA_DROME	33.96	4e-06	Sepia	Pyrimidodiazepine synthase
598	A0A1B0CAU8	Uncharacterized protein	ARHG3_CHICK	24.5	4e-10	Arhg3	Rho guanine nucleotide exchange factor 3
599	A0A1B0CAV0	Uncharacterized protein	KCNH6_CHICK	40.69	1e-23	Kcnh6	Potassium voltage-gated channel subfamily H member 6
600	A0A1B0CAV1	Uncharacterized protein	KCNH6_CHICK	67.68	6e-128	Kcnh6	Potassium voltage-gated channel subfamily H member 6
601	A0A1B0CAV3	Uncharacterized protein	ZIG8_CAEEL	38.3	1e-14	Zig8	Zwei Ig domain protein zig-8
602	A0A1B0CAV8	Uncharacterized protein	TSL_DROME	62.39	9e-157	Tsl	Torso-like protein
603	A0A1B0CAV9	Uncharacterized protein	PUF_DROME	39.91	1e-85	Puf	Ubiquitin carboxyl-terminal hydrolase puf
604	A0A1B0CAW0	Uncharacterized protein	IF2P_DICDI	42.73	2e-22	Eif5b	Eukaryotic translation initiation factor 5B
605	A0A1B0CAW1	Uncharacterized protein	PLA1A_DANRE	37.37	2e-11	Pla1a	Phospholipase A1 member A
606	A0A1B0CAW3	Uncharacterized protein	PA14_POLDO	49.15	1e-26	Pa14	Phospholipase A1 4
607	A0A1B0CAW7	Uncharacterized protein	HAM_DROME	40.17	1e-149	Ham	Transcription factor hamlet
608	A0A1B0CAY0	Uncharacterized protein	L259_DROME	23.84	6e-18	L259	Probable multidrug resistance-associated protein lethal(2)03659
609	A0A1B0CAY2	Uncharacterized protein	DFP3_ANTMY	36.31	4e-22	Dfp3	Putative defense protein 3
610	A0A1B0CAY4	Uncharacterized protein	PARP_SARPE	50.67	4e-19	Parp	Poly [ADP-ribose] polymerase
611	A0A1B0CAY5	Uncharacterized protein	DFP1_ANTMY	25.97	7e-08	Dfp1	Putative defense protein 1
612	A0A1B0CAY6	Uncharacterized protein	DFP_BOMMO	26.09	5e-06	Dfp	Putative defense protein
613	A0A1B0CAY8	Uncharacterized protein	MESH1_XENTR	63.16	2e-72	Hddc3	Guanosine-3',5'-bis(diphosphate) 3'-pyrophosphohydrolase MESH1
614	A0A1B0CAY9	Uncharacterized protein	MESH1_XENTR	65.62	6e-09	Hddc3	Guanosine-3',5'-bis(diphosphate) 3'-pyrophosphohydrolase MESH1
615	A0A1B0CAZ2	Uncharacterized protein	RFX3_XENTR	76.74	9e-65	Rfx3	Transcription factor RFX3
616	A0A1B0CAZ3	Uncharacterized protein	RFX3_XENTR	49.79	2e-67	Rfx3	Transcription factor RFX3
617	A0A1B0CAZ4	Uncharacterized protein	DNJ6B_XENLA	36.71	9e-15	Dnj6b	DnaJ homolog subfamily B member 6-B
618	A0A1B0CAZ5	Uncharacterized protein	FLII_DROME	71.66	0	Flii	Protein flightless-1
619	A0A1B0CAZ7	Uncharacterized protein	3BP5H_DROME	56.55	6e-171	Pcs	SH3 domain-binding protein 5 homolog
620	A0A1B0CAZ8	Uncharacterized protein	DAA1A_XENLA	52.99	5e-166	Daa1a	Disheveled-associated activator of morphogenesis 1-A
621	A0A1B0CB02	Uncharacterized protein	Y1760_DROME	53.69	4e-61	Y1760	Probable G-protein coupled receptor CG31760
622	A0A1B0CB03	Uncharacterized protein	RXRA_XENLA	32.6	9e-30	Rxra	Retinoic acid receptor RXR-alpha
623	A0A1B0CB04	Uncharacterized protein	GATA4_XENLA	54.46	6e-69	Gata4	Transcription factor GATA-4
624	A0A1B0CB05	Uncharacterized protein	GATA4_XENLA	41.51	4e-09	Gata4	Transcription factor GATA-4
625	A0A1B0CB06	Uncharacterized protein	GAT5A_XENLA	42	2e-08	Gat5a	GATA-binding factor 5-A
626	A0A1B0CB07	Uncharacterized protein	SALM_DROME	37.5	1e-09	Salm	Homeotic protein spalt-major
627	A0A1B0CB09	Uncharacterized protein	DRPR_DROME	37.1	5e-177	Drpr	Protein draper
628	A0A1B0CB10	Uncharacterized protein	SVOP_XENLA	23.79	3e-25	Svop	Synaptic vesicle 2-related protein
629	A0A1B0CB11	Uncharacterized protein	A1A1A_DANRE	44.85	3e-89	A1a1a	Alcohol dehydrogenase [NADP(+)] A
630	A0A1B0CB12	Uncharacterized protein	WHITE_DROME	52.77	4e-114	White	Protein white
631	A0A1B0CB13	Uncharacterized protein	MYNN_DANRE	37.74	9e-06	Mynn	Myoneurin
632	A0A1B0CB15	Uncharacterized protein	BUD32_DICDI	38.79	5e-21	Bud32	EKC/KEOPS complex subunit bud32
633	A0A1B0CB16	Uncharacterized protein	BUD32_DICDI	51.25	5e-19	Bud32	EKC/KEOPS complex subunit bud32
634	A0A1B0CB17	Uncharacterized protein	DHRS4_CAEEL	41.49	5e-13	Dhrs4	Dehydrogenase/reductase SDR family member 4
635	A0A1B0CB19	Uncharacterized protein	TRYP_ASTAS	65.67	2e-22	Tryp	Trypsin-1
636	A0A1B0CB20	Uncharacterized protein	ACO11_TRINI	53.75	4e-23	D11ds	Acyl-CoA Delta(11) desaturase
637	A0A1B0CB21	Uncharacterized protein	TOR_DROME	90.14	2e-41	Tor	Serine/threonine-protein kinase Tor
638	A0A1B0CB22	Uncharacterized protein	OVCH2_RHIAE	30.06	1e-11	Ovch2	Ovochymase-2
639	A0A1B0CB23	Uncharacterized protein	APTX_DROME	38.89	2e-26	Aptx	Aprataxin-like protein
640	A0A1B0CB24	Uncharacterized protein	WWOX_CHICK	31.95	2e-34	Wwox	WW domain-containing oxidoreductase
641	A0A1B0CB25	Uncharacterized protein	BAG5_CHICK	32.67	2e-07	Bag5	BAG family molecular chaperone regulator 5
642	A0A1B0CB26	Uncharacterized protein	VPS51_DROME	70.81	0	Vps51	Vacuolar protein sorting-associated protein 51 homolog
643	A0A1B0CB27	Uncharacterized protein	DPP3_DROME	66.32	0	Dpp3	Dipeptidyl peptidase 3
644	A0A1B0CB28	Uncharacterized protein	DPOA2_DROME	44.59	2e-60	Dpoa2	DNA polymerase alpha subunit B
645	A0A1B0CB30	Uncharacterized protein	GALK_DICDI	36.17	3e-76	Galk	Galactokinase
646	A0A1B0CB31	Uncharacterized protein	PYM_DROSI	48.04	1e-48	Pym	Partner of Y14 and mago
647	A0A1B0CB32	Uncharacterized protein	CCNB_DROME	45.05	8e-90	Cycb	G2/mitotic-specific cyclin-B
648	A0A1B0CB33	Uncharacterized protein	NUP62_DROME	56.81	3e-78	Nup62	Nuclear pore glycoprotein p62
649	A0A1B0CB34	Uncharacterized protein	ICT1_SALSA	44.04	3e-25	Ict1	Peptidyl-tRNA hydrolase ICT1, mitochondrial
650	A0A1B0CB35	Uncharacterized protein	EAF6_XENTR	81.61	9e-46	Meaf6	Chromatin modification-related protein MEAF6
651	A0A1B0CB37	Uncharacterized protein	NRT_DROME	50.81	9e-177	Nrt	Neurotactin
652	A0A1B0CB38	Uncharacterized protein	MYRO1_BREBR	44.83	4e-119	Myro1	Myrosinase 1
653	A0A1B0CB42	Uncharacterized protein	ZO26_XENLA	32.81	7e-14	Zo26	Oocyte zinc finger protein XlCOF26
654	A0A1B0CB43	Uncharacterized protein	DMDA_DROME	23.44	2e-15	Dys	Dystrophin, isoforms A/C/F/G/H
655	A0A1B0CB44	Uncharacterized protein	NRF6_CAEEL	24.79	2e-22	Nrf6	Nose resistant to fluoxetine protein 6
656	A0A1B0CB46	Uncharacterized protein	GROU_DROME	82.24	0	Gro	Protein groucho
657	A0A1B0CB47	Uncharacterized protein	DAR1_DROME	57.65	3e-29	Dar1	Dendritic arbor reduction protein 1
658	A0A1B0CB48	Uncharacterized protein	EXOC8_CHICK	28.91	3e-75	Exoc8	Exocyst complex component 8
659	A0A1B0CB50	Uncharacterized protein	RAS1_DROMO	79.31	4e-77	Ras1	Ras-like protein 1
660	A0A1B0CB57	Uncharacterized protein	RTBP_DROME	68.87	8e-42	Rtbp	REPTOR-binding partner
661	A0A1B0CB59	Uncharacterized protein	M4GDB_DANRE	25.11	5e-12	M4gdb	MIF4G domain-containing protein B
662	A0A1B0CB60	Uncharacterized protein	HDC_DROME	64.1	2e-45	Hdc	Headcase protein
663	A0A1B0CB61	Uncharacterized protein	PPAF1_HOLDI	40	3e-47	Ppaf1	Phenoloxidase-activating factor 1
664	A0A1B0CB62	Uncharacterized protein	MYO5A_CHICK	44.55	1e-20	Myo5a	Unconventional myosin-Va
665	A0A1B0CB64	Uncharacterized protein	CHM4B_XENLA	62.95	3e-75	Chm4b	Charged multivesicular body protein 4b
666	A0A1B0CB65	Uncharacterized protein	LSM6_DICDI	68.12	3e-29	Lsm6	Probable U6 snRNA-associated Sm-like protein LSm6
667	A0A1B0CB68	Uncharacterized protein	TONSL_DROME	37.41	0	Tonsl	Tonsoku-like protein
668	A0A1B0CB69	Uncharacterized protein	EI2BD_DICDI	39.95	2e-82	Ei2bd	Translation initiation factor eIF-2B subunit delta
669	A0A1B0CB71	Uncharacterized protein	KLC_DROME	84.35	0	Klc	Kinesin light chain
670	A0A1B0CB72	Uncharacterized protein	TLR2_DROME	34.55	6e-55	Tlr2	Tachykinin-like peptides receptor 99D
671	A0A1B0CB79	Uncharacterized protein	CKI1_CAEEL	26.45	6e-08	Cki1	Cyclin-dependent kinase inhibitor 1
672	A0A1B0CB81	Uncharacterized protein	FPPS_CHICK	32.16	8e-52	Fdps	Farnesyl pyrophosphate synthase
673	A0A1B0CB83	Uncharacterized protein	CLU_AEDAE	73.25	0	Clu	Clustered mitochondria protein homolog
674	A0A1B0CB84	Uncharacterized protein	PKRI1_XENTR	62.9	2e-21	Pkri1	PRKR-interacting protein 1 homolog
675	A0A1B0CB87	Uncharacterized protein	CU01_ANOGA	56.25	9e-18	Cu01	Cuticle protein
676	A0A1B0CB88	Uncharacterized protein	AGAP1_XENLA	33.66	2e-23	Agap1	Arf-GAP with GTPase, ANK repeat and PH domain-containing protein 1
677	A0A1B0CB91	Uncharacterized protein	TOLL8_DROME	24.5	8e-11	Toll8	Toll-like receptor Tollo
678	A0A1B0CB92	Uncharacterized protein	DRM_DROME	89.87	5e-48	Drm	Protein drumstick
679	A0A1B0CB93	Uncharacterized protein	ODP2_CAEEL	55.37	8e-170	Odp2	Dihydrolipoyllysine-residue acetyltransferase component of pyruvate dehydrogenase complex, mitochondrial
680	A0A1B0CB99	Uncharacterized protein	41_DROME	28.03	4e-25	Cora	Protein 4.1 homolog
681	A0A1B0CBA0	Uncharacterized protein	CCNT_DROME	32.78	2e-36	Cyct	Cyclin-T
682	A0A1B0CBA1	Uncharacterized protein	SPRTN_CAEEL	44.21	8e-41	Sprtn	SprT-like domain-containing protein Spartan
683	A0A1B0CBA2	Uncharacterized protein	ZO6_XENLA	32.52	8e-31	Zo6	Oocyte zinc finger protein XlCOF6
684	A0A1B0CBA3	Uncharacterized protein	FEZF1_XENTR	32.12	2e-07	Fezf1	Fez family zinc finger protein 1
685	A0A1B0CBA4	Uncharacterized protein	ZG57_XENLA	29.93	2e-12	Zg57	Gastrula zinc finger protein XlCGF57.1
686	A0A1B0CBA5	Uncharacterized protein	PELET_DROME	21.29	1e-08	Pelet	Transposable element P transposase
687	A0A1B0CBA8	Uncharacterized protein	LAMC1_DROME	23.79	5e-13	Lanb2	Laminin subunit gamma-1
688	A0A1B0CBA9	Uncharacterized protein	ARRH_LOCMI	29.23	5e-47	Arrh	Arrestin homolog
689	A0A1B0CBB0	Uncharacterized protein	TOLL8_DROME	30.19	1e-08	Toll8	Toll-like receptor Tollo
690	A0A1B0CBB1	Uncharacterized protein	LSG1_DROME	32.16	2e-33	Ns3	Large subunit GTPase 1 homolog
691	A0A1B0CBB3	Uncharacterized protein	WGE_DROME	80.77	9e-22	Wge	Protein winged eye
692	A0A1B0CBB4	Uncharacterized protein	CADM3_XENLA	24.44	1e-08	Cadm3	Cell adhesion molecule 3
693	A0A1B0CBB5	Uncharacterized protein	B4GA1_DANRE	25	2e-21	B4ga1	Beta-1,4-glucuronyltransferase 1
694	A0A1B0CBC1	Uncharacterized protein	ERM_DROME	36.84	3e-08	Erm	Fez family zinc finger protein erm
695	A0A1B0CBC8	Uncharacterized protein	FA89A_XENLA	34.15	1e-10	Fa89a	Protein FAM89A
696	A0A1B0CBD0	Uncharacterized protein	PGM2_DICDI	45.16	2e-166	Pgmb	Probable phosphoglucomutase-2
697	A0A1B0CBD2	Uncharacterized protein	PMS2_CHICK	61.5	6e-81	Pms2	Mismatch repair endonuclease PMS2
698	A0A1B0CBD3	Uncharacterized protein	SAMH1_CHICK	29.27	6e-18	Samh1	Deoxynucleoside triphosphate triphosphohydrolase SAMHD1
699	A0A1B0CBD4	Uncharacterized protein	PIPE_DROME	44.16	6e-87	Pip	Heparan sulfate 2-O-sulfotransferase pipe
700	A0A1B0CBD6	Uncharacterized protein	I2BP2_XENLA	79.25	2e-24	I2bp2	Interferon regulatory factor 2-binding protein 2
701	A0A1B0CBD7	Uncharacterized protein	ESN_DROPS	40.79	8e-75	Esn	Protein espinas
702	A0A1B0CBD8	Uncharacterized protein	CHI10_DROME	38.46	4e-06	Chi10	Probable chitinase 10
703	A0A1B0CBD9	Uncharacterized protein	CHIT_BRUMA	34.04	1e-06	Chit	Endochitinase
704	A0A1B0CBE0	Uncharacterized protein	SYLM_DICDI	33.79	3e-157	Mleus	Leucine--tRNA ligase, mitochondrial
705	A0A1B0CBE4	Uncharacterized protein	ACSF2_DANRE	36.57	4e-107	Acsf2	Acyl-CoA synthetase family member 2, mitochondrial
706	A0A1B0CBE5	Uncharacterized protein	SDK_DROME	22.7	6e-09	Sdk	Protein sidekick
707	A0A1B0CBE9	Uncharacterized protein	POE_DROPS	43.33	7e-43	Poe	Protein purity of essence
708	A0A1B0CBF0	Uncharacterized protein	WDR24_DROME	54.71	0	Wdr24	GATOR complex protein WDR24
709	A0A1B0CBF2	Uncharacterized protein	RO60_XENLA	22.37	4e-20	Ro60	60 kDa SS-A/Ro ribonucleoprotein
710	A0A1B0CBF6	Uncharacterized protein	HIW_DROME	29.25	2e-06	Hiw	E3 ubiquitin-protein ligase highwire
711	A0A1B0CBF7	Uncharacterized protein	ADF1_DROME	28	4e-06	Adf1	Transcription factor Adf-1
712	A0A1B0CBG1	Uncharacterized protein	HIW_DROME	50.19	2e-134	Hiw	E3 ubiquitin-protein ligase highwire
713	A0A1B0CBG2	Uncharacterized protein	FUCT1_DROME	61.31	2e-146	Nac	GDP-fucose transporter 1
714	A0A1B0CBG3	Uncharacterized protein	NUP50_DROME	32.39	2e-68	Nup50	Nuclear pore complex protein Nup50
715	A0A1B0CBG5	Uncharacterized protein	EMC1_CHICK	32.8	3e-19	Emc1	ER membrane protein complex subunit 1
716	A0A1B0CBG6	Uncharacterized protein	TMUB1_DANRE	29.52	1e-16	Tmub1	Transmembrane and ubiquitin-like domain-containing protein 1
717	A0A1B0CBG7	Uncharacterized protein	YELF2_DROME	32.36	9e-44	Yelf2	L-dopachrome tautomerase yellow-f2
718	A0A1B0CBG8	Uncharacterized protein	YELF2_DROME	34.68	2e-21	Yelf2	L-dopachrome tautomerase yellow-f2
719	A0A1B0CBG9	Uncharacterized protein	YELF2_DROME	30.93	6e-06	Yelf2	L-dopachrome tautomerase yellow-f2
720	A0A1B0CBH0	Uncharacterized protein	YELF_DROME	23.25	2e-22	Yelf	L-dopachrome tautomerase yellow-f
721	A0A1B0CBH2	Uncharacterized protein	YELF2_DROME	35.96	4e-10	Yelf2	L-dopachrome tautomerase yellow-f2
722	A0A1B0CBH3	Uncharacterized protein	YELF2_DROME	35.9	2e-11	Yelf2	L-dopachrome tautomerase yellow-f2
723	A0A1B0CBH4	Uncharacterized protein	YELF2_DROME	26.69	1e-24	Yelf2	L-dopachrome tautomerase yellow-f2
724	A0A1B0CBH5	Uncharacterized protein	YELF2_DROME	26.43	2e-27	Yelf2	L-dopachrome tautomerase yellow-f2
725	A0A1B0CBH6	Uncharacterized protein	YELF2_DROME	26.65	8e-35	Yelf2	L-dopachrome tautomerase yellow-f2
726	A0A1B0CBH7	Uncharacterized protein	FP1_MYTED	20.27	5e-15	Fp1	Adhesive plaque matrix protein
727	A0A1B0CBH9	Uncharacterized protein	RNC_CAEEL	39.4	2e-122	Rnc	Ribonuclease 3
728	A0A1B0CBQ0	Uncharacterized protein	ZBT24_DANRE	28.06	5e-09	Zbt24	Zinc finger and BTB domain-containing protein 24
729	A0A1B0CBQ5	Uncharacterized protein	TAG53_CAEEL	35.18	4e-45	Tag53	Putative protein tag-53
730	A0A1B0CBQ8	Uncharacterized protein	PEBPH_CAEEL	40	4e-26	Pebph	Phosphatidylethanolamine-binding protein homolog F40A3.3
731	A0A1B0CBR0	Uncharacterized protein	ZASP_DROME	36.23	1e-08	Zasp	PDZ and LIM domain protein Zasp
732	A0A1B0CBR2	Uncharacterized protein	DDX17_DICDI	48.52	3e-135	Ddx17	Probable ATP-dependent RNA helicase ddx17
733	A0A1B0CBR9	Uncharacterized protein	SDK1_CHICK	31.5	1e-06	Sdk1	Protein sidekick-1
734	A0A1B0CBS1	Uncharacterized protein	PIEZO_DROME	39.77	9e-50	Piezo	Piezo-type mechanosensitive ion channel component
735	A0A1B0CBS2	Uncharacterized protein	PIEZO_DROME	57.23	4e-55	Piezo	Piezo-type mechanosensitive ion channel component
736	A0A1B0CBS3	Uncharacterized protein	NRX4_DROME	29	2e-06	Nrx4	Neurexin-4
737	A0A1B0CBS4	Uncharacterized protein	UD3A1_XENLA	25.55	3e-35	Ud3a1	UDP-glucuronosyltransferase 3A1
738	A0A1B0CBS6	Uncharacterized protein	RBP1_DROME	92.59	3e-52	Rbp1	RNA-binding protein 1
739	A0A1B0CBS9	Uncharacterized protein	TM35A_DANRE	38.28	5e-25	Tm35a	Transmembrane protein 35A
740	A0A1B0CBT3	Uncharacterized protein	CLVS1_XENLA	27.7	6e-19	Clvs1	Clavesin-1
741	A0A1B0CBT5	Uncharacterized protein	A1A1A_DANRE	41.5	4e-55	A1a1a	Alcohol dehydrogenase [NADP(+)] A
742	A0A1B0CBT8	Uncharacterized protein	STT3_CAEEL	66.93	0	Stt3	Dolichyl-diphosphooligosaccharide--protein glycosyltransferase subunit stt-3
743	A0A1B0CBT9	Uncharacterized protein	ASPG_DIRIM	46.45	0	Aspg	L-asparaginase
744	A0A1B0CBU0	Uncharacterized protein	SC5A8_XENLA	30.05	8e-76	Sc5a8	Sodium-coupled monocarboxylate transporter 1
745	A0A1B0CBU1	Uncharacterized protein	CALR_DROME	77.87	0	Calr	Calreticulin
746	A0A1B0CBU2	Uncharacterized protein	ORC6_DROME	32.64	1e-22	Orc6	Origin recognition complex subunit 6
747	A0A1B0CBU5	Uncharacterized protein	PORED_DROME	39.15	5e-60	Pored	Polyprenol reductase
748	A0A1B0CBU7	Uncharacterized protein	TRET1_BOMMO	26.8	2e-25	Tret1	Facilitated trehalose transporter Tret1
749	A0A1B0CBU8	Uncharacterized protein	RFC5_CAEEL	55.27	1e-114	Rfc5	Probable replication factor C subunit 5
750	A0A1B0CBU9	Uncharacterized protein	RFC5_CAEEL	55.27	4e-123	Rfc5	Probable replication factor C subunit 5
751	A0A1B0CBV0	Uncharacterized protein	DPF3_DANRE	57.33	5e-24	Dpf3	Zinc finger protein DPF3
752	A0A1B0CBV1	Uncharacterized protein	DAPKR_DROME	69.23	1e-06	Drak	Death-associated protein kinase related
753	A0A1B0CBV2	Uncharacterized protein	ICCR_DROME	26.8	3e-12	Rst	Irregular chiasm C-roughest protein
754	A0A1B0CBV3	Uncharacterized protein	RYBPA_DANRE	63.33	2e-05	Rybpa	RING1 and YY1-binding protein A
755	A0A1B0CBV5	Uncharacterized protein	ODD_DROME	47.26	2e-96	Odd	Protein odd-skipped
756	A0A1B0CBV6	Uncharacterized protein	ZN395_XENLA	33.94	1e-20	Zn395	Zinc finger protein 395
757	A0A1B0CBV7	Uncharacterized protein	HPS5_DROME	33.29	2e-134	Hps5	Hermansky-Pudlak syndrome 5 protein homolog
758	A0A1B0CBW0	Uncharacterized protein	E41L4_DANRE	38.06	1e-120	E41l4	Band 4.1-like protein 4
759	A0A1B0CBW1	Uncharacterized protein	PSC_DROME	67.62	2e-95	Psc	Polycomb group protein Psc
760	A0A1B0CBW2	Uncharacterized protein	PPO2_DROME	51.88	0	Ppo2	Phenoloxidase 2
761	A0A1B0CBW4	Uncharacterized protein	AKR_CHICK	64.84	4e-38	Akr	Homeobox protein AKR
762	A0A1B0CBW5	Uncharacterized protein	NKAIN_DROME	73.03	2e-42	Nkain	Sodium/potassium-transporting ATPase subunit beta-1-interacting protein
763	A0A1B0CBW7	Uncharacterized protein	DHAK_DICDI	29.68	6e-50	Dhak	Probable dihydroxyacetone kinase
764	A0A1B0CBW8	Uncharacterized protein	RU17_DROME	96.3	2e-15	Ru17	U1 small nuclear ribonucleoprotein 70 kDa
765	A0A1B0CBW9	Uncharacterized protein	KLFL_DROME	75.86	5e-08	Klfl	Krueppel-like factor luna
766	A0A1B0CBX0	Uncharacterized protein	SHOC2_XENLA	25.19	8e-12	Shoc2	Leucine-rich repeat protein SHOC-2
767	A0A1B0CBX2	Uncharacterized protein	SBKH_DROME	56.52	1e-168	Sbkh	Serine/threonine-protein kinase meng-po
768	A0A1B0CBX6	Uncharacterized protein	SI12A_XENLA	59.38	2e-06	Si12a	Small integral membrane protein 12-A
769	A0A1B0CBX8	Uncharacterized protein	TOLL7_DROME	27.83	1e-07	Toll7	Toll-like receptor 7
770	A0A1B0CBX9	Uncharacterized protein	E631_DROME	68.32	7e-42	E631	Calcium-binding protein E63-1
771	A0A1B0CBY0	Uncharacterized protein	PEO1_CHICK	41.79	5e-145	Peo1	Twinkle protein, mitochondrial
772	A0A1B0CBY1	Uncharacterized protein	TOM22_CAEEL	43.88	6e-21	Tom22	Mitochondrial import receptor subunit TOM22 homolog
773	A0A1B0CBY3	Uncharacterized protein	SIFAR_DROME	45.45	2e-16	Sifar	Neuropeptide SIFamide receptor
774	A0A1B0CBY5	Uncharacterized protein	TLR1_DROME	24.51	3e-18	Tlr1	Tachykinin-like peptides receptor 86C
775	A0A1B0CBY7	Uncharacterized protein	RTXE_DROME	24.88	3e-46	Rtxe	Probable RNA-directed DNA polymerase from transposon X-element
776	A0A1B0CBY8	Uncharacterized protein	GAGXE_DROME	34.3	2e-46	Gagxe	Nucleic-acid-binding protein from transposon X-element
777	A0A1B0CBY9	Uncharacterized protein	CP305_DROME	37.95	8e-113	Cp305	Probable cytochrome P450 305a1
778	A0A1B0CBZ1	Uncharacterized protein	PCFT_XENLA	24.59	8e-20	Pcft	Proton-coupled folate transporter
779	A0A1B0CBZ2	Uncharacterized protein	RAD21_XENLA	45.12	1e-11	Rad21	Double-strand-break repair protein rad21 homolog
780	A0A1B0CBZ3	Uncharacterized protein	ATO_DROME	36.31	7e-47	Ato	Protein atonal
781	A0A1B0CBZ4	Uncharacterized protein	NOCT_XENLA	46.15	8e-89	Noct	Nocturnin
782	A0A1B0CBZ5	Uncharacterized protein	SP88E_DROME	43.46	2e-79	Sp88e	Serine protease inhibitor 88Ea
783	A0A1B0CBZ8	Uncharacterized protein	PTP3_DICDI	33.45	8e-38	Ptpc	Tyrosine-protein phosphatase 3
784	A0A1B0CC03	Uncharacterized protein	GTPB6_XENLA	37.3	3e-91	Gtpb6	Putative GTP-binding protein 6
785	A0A1B0CC04	Uncharacterized protein	PRKDC_XENLA	30.44	1e-50	Prkdc	DNA-dependent protein kinase catalytic subunit
786	A0A1B0CC07	Uncharacterized protein	SECG_DICDI	31.4	5e-09	Secg	Ankyrin repeat, PH and SEC7 domain containing protein secG
787	A0A1B0CC09	Uncharacterized protein	E74EB_DROME	88.68	2e-49	E74eb	Ecdysone-induced protein 74EF isoform B
788	A0A1B0CC10	Uncharacterized protein	RBG1L_CHICK	32.92	4e-55	Rbg1l	Rab GTPase-activating protein 1-like
789	A0A1B0CC13	Uncharacterized protein	TEKT4_XENLA	33.89	4e-24	Tekt4	Tektin-4
790	A0A1B0CC14	Uncharacterized protein	TEKT4_XENLA	34.44	2e-24	Tekt4	Tektin-4
791	A0A1B0CC15	Uncharacterized protein	TEKT4_XENLA	29.35	7e-12	Tekt4	Tektin-4
792	A0A1B0CC20	Uncharacterized protein	MFS11_XENLA	36.57	6e-73	Mfs11	UNC93-like protein MFSD11
793	A0A1B0CC21	Uncharacterized protein	CSKI2_XENLA	48.59	3e-35	Cski2	Caskin-2
794	A0A1B0CC23	Uncharacterized protein	NINAG_DROME	38.2	1e-113	Ninag	Neither inactivation nor afterpotential protein G
795	A0A1B0CC24	Uncharacterized protein	RLP24_DROME	73.74	1e-94	Rlp24	Probable ribosome biogenesis protein RLP24
796	A0A1B0CC25	Uncharacterized protein	5NTC_DICDI	27.06	9e-21	Nt5c2	Cytosolic purine 5'-nucleotidase
797	A0A1B0CC26	Uncharacterized protein	THIL1_DICDI	42.49	3e-104	Thil1	Probable acetyl-CoA acetyltransferase
798	A0A1B0CC27	Uncharacterized protein	SRPRA_DROME	61.65	0	Srpra	Signal recognition particle receptor subunit alpha homolog
799	A0A1B0CC28	Uncharacterized protein	SPTCB_DROME	20.98	1e-42	Sptcb	Spectrin beta chain
800	A0A1B0CC29	Uncharacterized protein	LIMK2_CHICK	40.19	8e-59	Limk2	LIM domain kinase 2
801	A0A1B0CC31	Uncharacterized protein	CR3LA_DANRE	50.31	3e-36	Cr3la	Cyclic AMP-responsive element-binding protein 3-like protein 3-A
802	A0A1B0CC32	Uncharacterized protein	CP307_DROME	54.46	0	Spo	Cytochrome P450 307a1
803	A0A1B0CC33	Uncharacterized protein	DAF36_CAEEL	38.12	2e-87	Daf36	Cholesterol 7-desaturase
804	A0A1B0CC34	Uncharacterized protein	XPP_DROME	62.68	0	Xpp	Xaa-Pro aminopeptidase ApepP
805	A0A1B0CC35	Uncharacterized protein	PTPM1_DROME	69.27	1e-97	Ptpm1	Phosphatidylglycerophosphatase and protein-tyrosine phosphatase 1
806	A0A1B0CC36	Uncharacterized protein	LR2BP_DANRE	30.77	4e-07	Lr2bp	LRP2-binding protein
807	A0A1B0CC37	Uncharacterized protein	PR6AB_XENLA	86.88	0	Pr6ab	26S proteasome regulatory subunit 6A-B
808	A0A1B0CC38	Uncharacterized protein	RALB_TODPA	32.65	6e-54	Ralb	Retinal-binding protein
809	A0A1B0CC39	Uncharacterized protein	MED14_AEDAE	67.79	0	Med14	Mediator of RNA polymerase II transcription subunit 14
810	A0A1B0CC40	Uncharacterized protein	CDC16_CAEEL	28.74	7e-42	Cdc16	Cell division cycle protein 16 homolog
811	A0A1B0CC41	Uncharacterized protein	ELOA1_DROME	41.34	2e-142	Eloa	Transcription elongation factor B polypeptide 3
812	A0A1B0CC42	Uncharacterized protein	VPS8_DROME	50	0	Vps8	Vacuolar protein sorting-associated protein 8 homolog
813	A0A1B0CC43	Uncharacterized protein	ZO6_XENLA	28.49	9e-12	Zo6	Oocyte zinc finger protein XlCOF6
814	A0A1B0CC45	Uncharacterized protein	CAPS_DROME	65.83	2e-98	Caps	Calcium-dependent secretion activator
815	A0A1B0CC46	Uncharacterized protein	CAPS_DROME	81.3	0	Caps	Calcium-dependent secretion activator
816	A0A1B0CC48	Uncharacterized protein	DSCL_DROME	21.51	6e-12	Dscl	Down syndrome cell adhesion molecule-like protein Dscam2
817	A0A1B0CC49	Uncharacterized protein	PHAR1_XENLA	68.75	3e-14	Phar1	Phosphatase and actin regulator 1
818	A0A1B0CC50	Uncharacterized protein	PHAR1_CHICK	68.07	2e-61	Phar1	Phosphatase and actin regulator 1
819	A0A1B0CC51	Uncharacterized protein	GEFF_DICDI	19.53	7e-06	Geff	Ras guanine nucleotide exchange factor F
820	A0A1B0CC52	Uncharacterized protein	PXDN_XENTR	26.21	8e-07	Pxdn	Peroxidasin
821	A0A1B0CC53	Uncharacterized protein	NHRF1_CHICK	47.27	3e-22	Nhrf1	Na(+)/H(+) exchange regulatory cofactor NHE-RF1
822	A0A1B0CC55	Uncharacterized protein	EXOC5_DROME	69.3	0	Exoc5	Exocyst complex component 5
823	A0A1B0CC56	Uncharacterized protein	RAB1A_LYMST	84.95	2e-128	Rab1a	Ras-related protein Rab-1A
824	A0A1B0CC59	Uncharacterized protein	TENS_CHICK	34.46	1e-47	Tns	Tensin
825	A0A1B0CC60	Uncharacterized protein	SVOP_XENLA	21.88	8e-13	Svop	Synaptic vesicle 2-related protein
826	A0A1B0CC61	Uncharacterized protein	DSCL_DROME	32.26	5e-12	Dscl	Down syndrome cell adhesion molecule-like protein Dscam2
827	A0A1B0CC62	Uncharacterized protein	GSTT1_LUCCU	29.61	5e-26	Gst1	Glutathione S-transferase 1-1
828	A0A1B0CC63	Uncharacterized protein	MED12_DROME	56.18	7e-64	Kto	Mediator of RNA polymerase II transcription subunit 12
829	A0A1B0CC64	Uncharacterized protein	IF1A_DICDI	70.07	4e-64	Eif1a	Eukaryotic translation initiation factor 1A
830	A0A1B0CC65	Uncharacterized protein	IF1A_DICDI	62.5	6e-22	Eif1a	Eukaryotic translation initiation factor 1A
831	A0A1B0CC67	Uncharacterized protein	SP15_TETCF	27.86	7e-59	Sp15	SITS-binding protein
832	A0A1B0CC68	Uncharacterized protein	HPR9_CAEEL	22.54	1e-11	Hpr9	Cell cycle checkpoint protein hpr-9
833	A0A1B0CC70	Uncharacterized protein	NPC2_DROME	34.21	3e-18	Npc2	NPC intracellular cholesterol transporter 2 homolog a
834	A0A1B0CC73	Uncharacterized protein	NPC2_DANRE	24.52	1e-07	Npc2	NPC intracellular cholesterol transporter 2
835	A0A1B0CC74	Uncharacterized protein	NPC2_DANRE	19.73	1e-07	Npc2	NPC intracellular cholesterol transporter 2
836	A0A1B0CC79	Uncharacterized protein	NPC2_DROME	25.97	2e-07	Npc2	NPC intracellular cholesterol transporter 2 homolog a
837	A0A1B0CC80	Uncharacterized protein	NPC2_DROME	25.32	4e-07	Npc2	NPC intracellular cholesterol transporter 2 homolog a
838	A0A1B0CC83	Uncharacterized protein	ALL2_TYRPU	27.59	2e-06	All2	Mite group 2 allergen Tyr p 2
839	A0A1B0CC84	Uncharacterized protein	ALL2_TYRPU	27.59	1e-06	All2	Mite group 2 allergen Tyr p 2
840	A0A1B0CC86	Uncharacterized protein	INSM1_XENTR	51.72	0.0002	Insm1	Insulinoma-associated protein 1
841	A0A1B0CC88	Uncharacterized protein	I80DB_DANRE	37.93	3e-19	I80db	INO80 complex subunit D-B
842	A0A1B0CC89	Uncharacterized protein	HEXIM_XENLA	29.19	4e-11	Hexim	Protein HEXIM
843	A0A1B0CC90	Uncharacterized protein	SMUG1_XENLA	43.56	4e-66	Smug1	Single-strand selective monofunctional uracil DNA glycosylase
844	A0A1B0CC91	Uncharacterized protein	C12B2_DROME	35.68	6e-108	C12b2	Probable cytochrome P450 12b2, mitochondrial
845	A0A1B0CC95	Uncharacterized protein	CDC37_DROVI	65.66	3e-118	Cdc37	Hsp90 co-chaperone Cdc37
846	A0A1B0CC97	Uncharacterized protein	KIF4_XENLA	38.56	0	Kif4	Chromosome-associated kinesin KIF4
847	A0A1B0CCB1	Uncharacterized protein	SMYD4_CHICK	26.2	8e-17	Smyd4	SET and MYND domain-containing protein 4
848	A0A1B0CCB2	Uncharacterized protein	EST6_APIME	32.61	2e-12	Est6	Venom carboxylesterase-6
849	A0A1B0CCB4	Uncharacterized protein	LACH_DROME	42.86	3e-74	Lac	Lachesin
850	A0A1B0CCB5	Uncharacterized protein	GORAB_DROME	60.84	1e-58	Gorab	RAB6-interacting golgin
851	A0A1B0CCB6	Uncharacterized protein	NAAT1_DROER	22.64	1e-14	Naat1	Sodium-dependent nutrient amino acid transporter 1
852	A0A1B0CCB7	Uncharacterized protein	PGPLF_DROME	31.16	2e-15	Pgplf	Peptidoglycan-recognition protein LF
853	A0A1B0CCC0	Uncharacterized protein	GAGXE_DROME	35	1e-46	Gagxe	Nucleic-acid-binding protein from transposon X-element
854	A0A1B0CCC1	Uncharacterized protein	IR25A_DROME	74.04	0	Ir25a	Ionotropic receptor 25a
855	A0A1B0CCC3	Uncharacterized protein	UB10B_XENLA	37.74	3e-88	Ub10b	Ubiquitin carboxyl-terminal hydrolase 10-B
856	A0A1B0CCC6	Uncharacterized protein	GTR1_DROME	83.09	0	Glut1	Glucose transporter type 1
857	A0A1B0CCC8	Uncharacterized protein	C102A_XENLA	45.26	2e-55	C102a	Coiled-coil domain-containing protein 102A
858	A0A1B0CCC9	Uncharacterized protein	CSP_PLAYO	48.35	3e-06	Csp	Circumsporozoite protein
859	A0A1B0CCD0	Uncharacterized protein	TTKA_DROME	63.87	9e-50	Ttk	Protein tramtrack, alpha isoform
860	A0A1B0CCD1	Uncharacterized protein	LOLA3_DROME	46.9	1e-23	Lola3	Longitudinals lacking protein, isoforms A/B/D/L
861	A0A1B0CCD2	Uncharacterized protein	TMM50_DICDI	33.1	1e-13	Tmm50	Transmembrane protein 50 homolog
862	A0A1B0CCD4	Uncharacterized protein	ZIG8_CAEEL	20.89	3e-09	Zig8	Zwei Ig domain protein zig-8
863	A0A1B0CCD6	Uncharacterized protein	ICH_DROME	58.93	8e-19	Ich	Ichor
864	A0A1B0CCD7	Uncharacterized protein	INT4_DROME	53.84	0	Int4	Integrator complex subunit 4
865	A0A1B0CCD9	Uncharacterized protein	RUS1_DICDI	40.67	2e-69	Rus1	RUS1 family protein homolog
866	A0A1B0CCE0	Uncharacterized protein	TDRD1_ORYLA	21.04	3e-14	Tdrd1	Tudor domain-containing protein 1
867	A0A1B0CCE3	Uncharacterized protein	ZFPL1_AEDAE	49.48	3e-52	Zfpl1	Zinc finger protein-like 1 homolog
868	A0A1B0CCE4	Uncharacterized protein	MDR49_DROME	56.15	7e-53	Mdr49	Multidrug resistance protein homolog 49
869	A0A1B0CCE5	Uncharacterized protein	MDR65_DROME	31.35	2e-87	Mdr65	Multidrug resistance protein homolog 65
870	A0A1B0CCE6	Uncharacterized protein	MDR49_DROME	26.03	2e-08	Mdr49	Multidrug resistance protein homolog 49
871	A0A1B0CCE9	Uncharacterized protein	CAD87_DROME	24.04	1e-18	Cad87	Cadherin-87A
872	A0A1B0CCF0	Uncharacterized protein	PUM_DROME	69.86	0	Pum	Maternal protein pumilio
873	A0A1B0CCF1	Uncharacterized protein	GADL1_XENTR	38.79	5e-27	Gadl1	Acidic amino acid decarboxylase GADL1
874	A0A1B0CCF2	Uncharacterized protein	CADN_ACRMI	35.71	6e-25	Cadn	Coadhesin
875	A0A1B0CCF3	Uncharacterized protein	PT117_DANRE	48.48	2e-14	Pt117	Protein PET117 homolog, mitochondrial
876	A0A1B0CCF4	Uncharacterized protein	U2AF1_DROME	81.91	2e-107	U2af1	Splicing factor U2af 38 kDa subunit
877	A0A1B0CCF5	Uncharacterized protein	PRS8_DROME	96.54	0	Rpt6	26S proteasome regulatory subunit 8
878	A0A1B0CCF6	Uncharacterized protein	DS_DROME	22.15	1e-08	Ds	Protein dachsous
879	A0A1B0CCF7	Uncharacterized protein	GSTT1_CHICK	33.76	1e-33	Gstt1	Glutathione S-transferase theta-1
880	A0A1B0CCF8	Uncharacterized protein	ARM_DROME	93.87	1e-124	Arm	Armadillo segment polarity protein
881	A0A1B0CCF9	Uncharacterized protein	ARL5_CAEEL	57.82	2e-59	Arl5	ADP-ribosylation factor-like protein 5
882	A0A1B0CCG0	Uncharacterized protein	POC1_DROME	28.99	1e-06	Poc1	POC1 centriolar protein homolog
883	A0A1B0CCG3	Uncharacterized protein	SPRI_DROME	33.19	6e-44	Spri	Protein sprint
884	A0A1B0CCG4	Uncharacterized protein	SCR_APIME	97.65	4e-57	Scr	Homeobox protein H55
885	A0A1B0CCG8	Uncharacterized protein	RHPN2_DANRE	32.86	6e-06	Rhpn2	Rhophilin-2
886	A0A1B0CCH1	Uncharacterized protein	MFRN_DROME	62.37	1e-120	Mfrn	Mitoferrin
887	A0A1B0CCH2	Uncharacterized protein	RL32_DROYA	90.12	4e-50	Rpl32	60S ribosomal protein L32
888	A0A1B0CCH3	Uncharacterized protein	AXN_DROME	55.56	2e-52	Axn	Axin
889	A0A1B0CCH8	Uncharacterized protein	FUR1C_DROME	77.1	0	Fur1	Furin-like protease 1, isoform 1-CRR
890	A0A1B0CCH9	Uncharacterized protein	FAT2_DROME	23.84	2e-13	Kug	Fat-like cadherin-related tumor suppressor homolog
891	A0A1B0CCI0	Uncharacterized protein	NINAB_DROME	40.47	1e-103	Ninab	Carotenoid isomerooxygenase
892	A0A1B0CCI1	Uncharacterized protein	RUNX1_XENLA	73.68	9e-47	Runx1	Runt-related transcription factor 1
893	A0A1B0CCI2	Uncharacterized protein	STIP1_CAEEL	29.73	3e-10	Stip1	Stress-induced-phosphoprotein 1
894	A0A1B0CCI3	Uncharacterized protein	LILI_DROME	71.94	2e-79	Lili	Protein Lilipod
895	A0A1B0CCI4	Uncharacterized protein	LYRM7_DANRE	52.78	4e-20	Lyrm7	Complex III assembly factor LYRM7
896	A0A1B0CCI5	Uncharacterized protein	ELL_DROME	55.32	2e-06	Ell	RNA polymerase II elongation factor Ell
897	A0A1B0CCI6	Uncharacterized protein	STIP1_DICDI	31.13	6e-11	Sti1	Protein STIP1 homolog
898	A0A1B0CCI7	Uncharacterized protein	COPB2_DROME	82.13	0	Copb2	Coatomer subunit beta'
899	A0A1B0CCI9	Uncharacterized protein	OTOP_DROME	41.29	6e-27	Otop	Proton channel OtopLc
900	A0A1B0CCJ0	Uncharacterized protein	RTXE_DROME	33.8	1e-06	Rtxe	Probable RNA-directed DNA polymerase from transposon X-element
901	A0A1B0CCJ3	Uncharacterized protein	ERF1_DROME	92.59	6e-159	Erf1	Eukaryotic peptide chain release factor subunit 1
902	A0A1B0CCJ4	Uncharacterized protein	CHDM_DROME	68.42	2e-09	Chdm	Chromodomain-helicase-DNA-binding protein Mi-2 homolog
903	A0A1B0CCJ6	Uncharacterized protein	CHDM_DROME	72.76	0	Chdm	Chromodomain-helicase-DNA-binding protein Mi-2 homolog
904	A0A1B0CCJ7	Uncharacterized protein	PIKI1_CAEEL	42.28	2e-89	Piki1	Phosphatidylinositol 3-kinase piki-1
905	A0A1B0CCJ9	Uncharacterized protein	PIKI1_CAEEL	38.51	3e-28	Piki1	Phosphatidylinositol 3-kinase piki-1
906	A0A1B0CCK1	Uncharacterized protein	HEY_DROME	67.58	3e-97	Hey	Hairy/enhancer-of-split related with YRPW motif protein
907	A0A1B0CCK4	Uncharacterized protein	APY_CIMLE	41.38	3e-82	Apy	Apyrase
908	A0A1B0CCK5	Uncharacterized protein	SYV_CAEEL	51.43	2e-149	Syv	Valine--tRNA ligase
909	A0A1B0CCK6	Uncharacterized protein	RSMB_DROME	89.68	6e-66	Smb	Small nuclear ribonucleoprotein-associated protein B
910	A0A1B0CCK7	Uncharacterized protein	Y5057_DROME	60	1e-72	Y5057	TPPP family protein CG45057
911	A0A1B0CCK8	Uncharacterized protein	PAX2A_XENLA	63.47	9e-82	Pax2a	Paired box protein Pax-2-A
912	A0A1B0CCL0	Uncharacterized protein	KANK2_DANRE	56.1	1e-07	Kank2	KN motif and ankyrin repeat domain-containing protein 2
913	A0A1B0CCL2	Uncharacterized protein	TLR2_DROME	70.7	1e-76	Tlr2	Tachykinin-like peptides receptor 99D
914	A0A1B0CCL5	Uncharacterized protein	RUNT_DROME	36.88	3e-28	Run	Segmentation protein Runt
915	A0A1B0CCL6	Uncharacterized protein	KAL1L_XENTR	51.79	2e-10	Kal1l	KAT8 regulatory NSL complex subunit 1-like protein
916	A0A1B0CCL7	Uncharacterized protein	CANA_DROME	57.31	1e-86	Calpa	Calpain-A
917	A0A1B0CCL9	Uncharacterized protein	SUF_DROME	75.49	0	Suf	Protein suppressor of forked
918	A0A1B0CCM1	Uncharacterized protein	U587_DROPS	60.98	6e-74	U587	UPF0587 protein GA18326
919	A0A1B0CCM2	Uncharacterized protein	ANC1_CAEEL	55.56	1e-06	Anc1	Nuclear anchorage protein 1
920	A0A1B0CCM5	Uncharacterized protein	RAP1_DROME	31.1	1e-17	Rap1	Ras-related protein Rap1
921	A0A1B0CCM7	Uncharacterized protein	YM67_CAEEL	32.44	1e-60	Ym67	Putative serine protease K12H4.7
922	A0A1B0CCM8	Uncharacterized protein	GNAI_DROME	81.31	7e-116	Gnai	G protein alpha i subunit
923	A0A1B0CCM9	Uncharacterized protein	NFKB1_DROME	50.45	5e-27	Nfkb1	Nuclear factor NF-kappa-B p110 subunit
924	A0A1B0CCN1	Uncharacterized protein	MYLK_CHICK	50.32	7e-106	Mylk	Myosin light chain kinase, smooth muscle
925	A0A1B0CCN3	Uncharacterized protein	OCAD1_DROME	51.65	2e-83	Asrij	OCIA domain-containing protein 1
926	A0A1B0CCN4	Uncharacterized protein	P2012_DANRE	40.32	4e-08	P2012	N-fatty-acyl-amino acid synthase/hydrolase PM20D1.2
927	A0A1B0CCN6	Uncharacterized protein	CTLH1_AEDAE	65.04	0	Ctlh1	CTL-like protein 1
928	A0A1B0CCN9	Uncharacterized protein	TAF2_DROME	76.17	0	Taf2	Transcription initiation factor TFIID subunit 2
929	A0A1B0CCP0	Uncharacterized protein	EF2_DROME	92.89	0	Ef2	Elongation factor 2
930	A0A1B0CCP1	Uncharacterized protein	ACADM_DROME	78.19	0	Acadm	Probable medium-chain specific acyl-CoA dehydrogenase, mitochondrial
931	A0A1B0CCP3	Uncharacterized protein	ORC1_DROME	43.2	0	Orc1	Origin recognition complex subunit 1
932	A0A1B0CCP4	Uncharacterized protein	NHL1_CAEEL	41.94	3e-36	Nhl1	RING finger protein nhl-1
933	A0A1B0CCP5	Uncharacterized protein	UBC7_CAEEL	55.68	2e-28	Ubc7	Probable ubiquitin-conjugating enzyme E2 7
934	A0A1B0CCP6	Uncharacterized protein	RGS20_CHICK	76	9e-23	Rgs20	Regulator of G-protein signaling 20
935	A0A1B0CCP9	Uncharacterized protein	SGT1_DICDI	35.23	7e-31	Sgt1	Protein SGT1 homolog
936	A0A1B0CCQ0	Uncharacterized protein	ETS3_DROME	92.63	2e-129	Ets3	DNA-binding protein D-ETS-3
937	A0A1B0CCQ1	Uncharacterized protein	ETS3_DROME	55	1e-37	Ets3	DNA-binding protein D-ETS-3
938	A0A1B0CCQ2	Uncharacterized protein	SCAI_DICDI	44.95	2e-95	Scai	Protein SCAI homolog
939	A0A1B0CCQ3	Uncharacterized protein	RDX_DROME	27.98	5e-08	Rdx	Protein roadkill
940	A0A1B0CCQ4	Uncharacterized protein	GBRB_DROME	73.1	2e-136	Rdl	Gamma-aminobutyric acid receptor subunit beta
941	A0A1B0CCQ6	Uncharacterized protein	IMA_DROME	46.91	1e-14	Pen	Importin subunit alpha
942	A0A1B0CCQ7	Uncharacterized protein	IMA_DROME	53.72	4e-39	Pen	Importin subunit alpha
943	A0A1B0CCQ8	Uncharacterized protein	SHEP_DROMO	78.24	0	Shep	Protein alan shepard
944	A0A1B0CCR0	Uncharacterized protein	METL_DROME	61.15	8e-122	Metl	Methyltransferase-like protein
945	A0A1B0CCR1	Uncharacterized protein	YKK7_CAEEL	22.83	4e-07	Ykk7	Uncharacterized F-box/LRR-repeat protein C02F5.7
946	A0A1B0CCR2	Uncharacterized protein	FBP1L_XENLA	33.99	8e-69	Fbp1l	Formin-binding protein 1-like
947	A0A1B0CCR3	Uncharacterized protein	TWIST_XENLA	53.28	1e-34	Twist	Twist-related protein
948	A0A1B0CCR6	Uncharacterized protein	ZC21A_DANRE	43.37	7e-32	Zc21a	Zinc finger C2HC domain-containing protein 1A
949	A0A1B0CCR8	Uncharacterized protein	RRP7_CAEEL	25	2e-16	Rrp7	Ribosomal RNA-processing protein 7 homolog
950	A0A1B0CCS2	Uncharacterized protein	CCAR1_XENLA	63.33	4e-05	Ccar1	Cell division cycle and apoptosis regulator protein 1
951	A0A1B0CCS3	Uncharacterized protein	LIN54_DROME	53.47	2e-62	Lin54	Protein lin-54 homolog
952	A0A1B0CCS4	Uncharacterized protein	RNF10_XENLA	37.29	2e-20	Rnf10	RING finger protein 10
953	A0A1B0CCS5	Uncharacterized protein	LIN54_DROME	53.47	1e-62	Lin54	Protein lin-54 homolog
954	A0A1B0CCS6	Uncharacterized protein	RNF10_XENLA	28.57	3e-22	Rnf10	RING finger protein 10
955	A0A1B0CCS7	Uncharacterized protein	USE1_DROME	40.56	6e-62	Use1	Vesicle transport protein USE1
956	A0A1B0CCS8	Uncharacterized protein	BIP_DROME	80.88	4e-30	Bip	Endoplasmic reticulum chaperone BiP
957	A0A1B0CCT0	Uncharacterized protein	MED22_ANOGA	83.94	3e-81	Med22	Mediator of RNA polymerase II transcription subunit 22
958	A0A1B0CCT1	Uncharacterized protein	SBNO_DROME	80.77	7e-31	Sbno	Protein strawberry notch
959	A0A1B0CCT8	Uncharacterized protein	SMYD2_CHICK	23.68	4e-24	Smyd2	N-lysine methyltransferase SMYD2
960	A0A1B0CCT9	Uncharacterized protein	ZW10_DROPS	46.15	2e-90	Zw10	Centromere/kinetochore protein zw10
961	A0A1B0CCU1	Uncharacterized protein	F234B_CHICK	28.57	5e-06	F234b	Protein FAM234B
962	A0A1B0CCU3	Uncharacterized protein	GD_DROME	35.64	3e-54	Gd	Serine protease gd
963	A0A1B0CCU4	Uncharacterized protein	FND3A_CHICK	24.74	4e-12	Fnd3a	Fibronectin type-III domain-containing protein 3a
964	A0A1B0CCU5	Uncharacterized protein	CP6G2_DROME	40.23	1e-126	Cp6g2	Probable cytochrome P450 6g2
965	A0A1B0CCU7	Uncharacterized protein	PCE_TACTR	36.88	3e-51	Pce	Proclotting enzyme
966	A0A1B0CCU8	Uncharacterized protein	TOLL7_DROME	63.68	0	Toll7	Toll-like receptor 7
967	A0A1B0CCU9	Uncharacterized protein	SRR1L_DROME	29.26	2e-26	Srr1l	SRR1-like protein
968	A0A1B0CCV0	Uncharacterized protein	FMC1_XENTR	41.58	6e-25	Fmc1	Protein FMC1 homolog
969	A0A1B0CCV1	Uncharacterized protein	ACDSB_DICDI	61.11	6e-31	Acdsb	Probable short/branched chain specific acyl-CoA dehydrogenase
970	A0A1B0CCV4	Uncharacterized protein	SMAP2_CHICK	49.46	7e-28	Smap2	Stromal membrane-associated protein 2
971	A0A1B0CCV7	Uncharacterized protein	CISH_CHICK	31.14	8e-17	Cish	Cytokine-inducible SH2-containing protein
972	A0A1B0CCV9	Uncharacterized protein	MTH5_DROME	62.81	0	Mthl5	Probable G-protein coupled receptor Mth-like 5
973	A0A1B0CCW0	Uncharacterized protein	MTH2_DROYA	25.21	1e-26	Mth2	G-protein coupled receptor Mth2
974	A0A1B0CCW1	Uncharacterized protein	IDLC_DROME	69.33	2e-110	Idlc	Putative inner dynein arm light chain, axonemal
975	A0A1B0CCW3	Uncharacterized protein	CCNB_DROME	41.92	3e-74	Cycb	G2/mitotic-specific cyclin-B
976	A0A1B0CCW6	Uncharacterized protein	NAA50_DANRE	29.45	3e-09	Naa50	N-alpha-acetyltransferase 50
977	A0A1B0CCW7	Uncharacterized protein	DHPR_DICDI	42.17	2e-54	Qdpr	Dihydropteridine reductase
978	A0A1B0CCW9	Uncharacterized protein	ZO71_XENLA	28.16	2e-18	Zo71	Oocyte zinc finger protein XlCOF7.1
979	A0A1B0CCX0	Uncharacterized protein	UNC36_CAEBR	36.94	7e-29	Unc36	Voltage-dependent calcium channel unc-36
980	A0A1B0CCX2	Uncharacterized protein	INT9_DROME	68.86	0	Int9	Integrator complex subunit 9
981	A0A1B0CCX3	Uncharacterized protein	IR75A_DROME	28.03	1e-07	Ir75a	Ionotropic receptor 75a
982	A0A1B0CCX4	Uncharacterized protein	LACH_SCHAM	25.08	1e-32	Lac	Lachesin
983	A0A1B0CCX6	Uncharacterized protein	T132E_DANRE	30.19	3e-12	T132e	Transmembrane protein 132E
984	A0A1B0CCX7	Uncharacterized protein	RX2_ORYLA	52.63	3e-27	Rx2	Retinal homeobox protein Rx2
985	A0A1B0CCX9	Uncharacterized protein	FUSED_DROME	44.59	0	Fused	Serine/threonine-protein kinase fused
986	A0A1B0CCY0	Uncharacterized protein	RL18_DROME	78.72	5e-107	Rpl18	60S ribosomal protein L18
987	A0A1B0CCY1	Uncharacterized protein	FLCN_XENTR	26.94	6e-45	Flcn	Folliculin
988	A0A1B0CCY2	Uncharacterized protein	NOL9_DROME	29.53	4e-85	Nol9	Polynucleotide 5'-hydroxyl-kinase NOL9
989	A0A1B0CCY3	Uncharacterized protein	RHO_DIPOM	71.43	1e-06	Rho	Ras-like GTP-binding protein O-RHO
990	A0A1B0CCY6	Uncharacterized protein	MAM_DROME	54.92	2e-24	Mam	Neurogenic protein mastermind
991	A0A1B0CCY7	Uncharacterized protein	MAM_DROME	52.54	5e-15	Mam	Neurogenic protein mastermind
992	A0A1B0CCY8	Uncharacterized protein	ELP4_XENLA	36.01	7e-61	Elp4	Elongator complex protein 4
993	A0A1B0CCY9	Uncharacterized protein	RTF1_DROME	45.74	1e-162	Rtf1	RNA polymerase-associated protein Rtf1
994	A0A1B0CCZ0	Uncharacterized protein	DESI2_DANRE	71.52	9e-88	Desi2	Deubiquitinase DESI2
995	A0A1B0CCZ1	Uncharacterized protein	CADF_DROME	95.92	5e-101	Cadf	Cofilin/actin-depolymerizing factor homolog
996	A0A1B0CCZ2	Uncharacterized protein	PP2C2_CAEEL	31.82	4e-07	Pp2c2	Probable protein phosphatase 2C T23F11.1
997	A0A1B0CCZ3	Uncharacterized protein	HAND2_DANRE	55.41	6e-16	Hand2	Heart- and neural crest derivatives-expressed protein 2
998	A0A1B0CCZ5	Uncharacterized protein	DYLT_DROME	88.29	8e-71	Dylt	Dynein light chain Tctex-type
999	A0A1B0CCZ6	Uncharacterized protein	TAD2A_DROME	31.96	1e-75	Tad2a	Transcriptional adapter 2A
1000	A0A1B0CCZ7	Uncharacterized protein	MOT12_XENTR	25.51	5e-19	Mot12	Monocarboxylate transporter 12
1001	A0A1B0CCZ8	Uncharacterized protein	SEC62_CHICK	40.47	6e-45	Sec62	Translocation protein SEC62
1002	A0A1B0CD01	Uncharacterized protein	TOLL8_DROME	26	7e-11	Toll8	Toll-like receptor Tollo
1003	A0A1B0CD02	Uncharacterized protein	TOLL8_DROME	23.83	3e-06	Toll8	Toll-like receptor Tollo
1004	A0A1B0CD03	Uncharacterized protein	NDST_DROME	28.52	1e-24	Sfl	Bifunctional heparan sulfate N-deacetylase/N-sulfotransferase
1005	A0A1B0CD06	Uncharacterized protein	KPC4_DROME	77.33	3e-34	Kpc4	Putative protein kinase C delta type homolog
1006	A0A1B0CD07	Uncharacterized protein	KPC4_DROME	79.07	1e-69	Kpc4	Putative protein kinase C delta type homolog
1007	A0A1B0CD09	Uncharacterized protein	ARRA_DROME	74.23	0	Arr1	Phosrestin-2
1008	A0A1B0CD11	Uncharacterized protein	RS15A_DROYA	97.69	2e-90	Rs15a	40S ribosomal protein S15a
1009	A0A1B0CD12	Uncharacterized protein	Y1809_DICDI	29.24	2e-07	Y1809	Rap-GAP domain-containing protein DDB_G0281809
1010	A0A1B0CD14	Uncharacterized protein	KPC1_DROME	87.5	6e-11	Kpc1	Protein kinase C, brain isozyme
1011	A0A1B0CD15	Uncharacterized protein	KPC1_DROME	87.23	2e-23	Kpc1	Protein kinase C, brain isozyme
1012	A0A1B0CD16	Uncharacterized protein	EST6_APIME	31.87	8e-06	Est6	Venom carboxylesterase-6
1013	A0A1B0CD18	Uncharacterized protein	CP6G1_DROME	47.02	3e-49	Cp6g1	Cytochrome P450 6g1
1014	A0A1B0CD19	Uncharacterized protein	CP6G2_DROME	42.34	3e-20	Cp6g2	Probable cytochrome P450 6g2
1015	A0A1B0CD20	Uncharacterized protein	CP6G2_DROME	39.34	7e-117	Cp6g2	Probable cytochrome P450 6g2
1016	A0A1B0CD21	Uncharacterized protein	LIME_DICDI	29.82	3e-11	Lime	LIM domain-containing protein E
1017	A0A1B0CD22	Uncharacterized protein	MICS1_CAEEL	42.68	4e-14	Mics1	Mitochondrial scaffolding protein 1
1018	A0A1B0CD23	Uncharacterized protein	GBP_XENLA	48.08	1e-05	Gbp	GSK-3-binding protein
1019	A0A1B0CD25	Uncharacterized protein	Y4439_DICDI	44.9	8e-10	Y4439	BolA-like protein DDB_G0274439
1020	A0A1B0CD26	Uncharacterized protein	SMA10_CAEEL	28.8	1e-99	Sma10	Leucine-rich repeats and immunoglobulin-like domains protein sma-10
1021	A0A1B0CD27	Uncharacterized protein	SY65_DROME	33.08	3e-14	Syt1	Synaptotagmin 1
1022	A0A1B0CD31	Uncharacterized protein	SVOP_CAEEL	22.49	4e-15	Svop	Putative transporter svop-1
1023	A0A1B0CD33	Uncharacterized protein	ADRM1_DROME	52.68	8e-103	Rpn13	Proteasomal ubiquitin receptor ADRM1 homolog
1024	A0A1B0CD35	Uncharacterized protein	OSG1_CAEEL	24.73	9e-31	Osg1	Rho guanine nucleotide exchange factor osg-1
1025	A0A1B0CD36	Uncharacterized protein	PDE1_DROME	64.29	2e-16	Pde1	Calcium/calmodulin-dependent 3',5'-cyclic nucleotide phosphodiesterase 1
1026	A0A1B0CD37	Uncharacterized protein	MAL2_DROVI	42.13	3e-95	Mal2	Maltase 2
1027	A0A1B0CD40	Uncharacterized protein	OCTB2_DROME	41.09	2e-30	Octb2	Octopamine receptor beta-2R
1028	A0A1B0CD42	Uncharacterized protein	BC7BB_DANRE	41.86	3e-23	Bc7bb	B-cell CLL/lymphoma 7 protein family member B-B
1029	A0A1B0CD44	Uncharacterized protein	NMDA1_DROGR	57.01	5e-151	Nmda1	Glutamate [NMDA] receptor subunit 1
1030	A0A1B0CD46	Uncharacterized protein	OBP72_ANOGA	42.98	1e-32	Obp72	General odorant-binding protein 72
1031	A0A1B0CD47	Uncharacterized protein	OBP72_ANOGA	42.61	4e-30	Obp72	General odorant-binding protein 72
1032	A0A1B0CD49	Uncharacterized protein	OB19A_DROME	43.57	5e-34	Ob19a	General odorant-binding protein 19a
1033	A0A1B0CD51	Uncharacterized protein	ADXH_DROME	81.37	1e-58	Fdxh	Adrenodoxin-like protein, mitochondrial
1034	A0A1B0CD53	Uncharacterized protein	NITO_DROME	66.71	0	Nito	RNA-binding protein spenito
1035	A0A1B0CD54	Uncharacterized protein	CAF1B_CHICK	44.52	2e-126	Caf1b	Chromatin assembly factor 1 subunit B
1036	A0A1B0CD56	Uncharacterized protein	NRX4_DROME	61.54	1e-10	Nrx4	Neurexin-4
1037	A0A1B0CD58	Uncharacterized protein	LST8_DROME	63.27	2e-67	Lst8	Protein LST8 homolog
1038	A0A1B0CD59	Uncharacterized protein	CRN_DROME	70.79	0	Crn	Protein crooked neck
1039	A0A1B0CD60	Uncharacterized protein	CRN_DROME	67.66	0	Crn	Protein crooked neck
1040	A0A1B0CD63	Uncharacterized protein	BRE4_CAEBR	47.84	1e-59	Bre4	Beta-1,4-N-acetylgalactosaminyltransferase bre-4
1041	A0A1B0CD64	Uncharacterized protein	HMG2_DROME	52.17	4e-08	Dsp1	High mobility group protein DSP1
1042	A0A1B0CD65	Uncharacterized protein	NFU1_DROAN	64.93	3e-117	Nfu1	NFU1 iron-sulfur cluster scaffold homolog, mitochondrial
1043	A0A1B0CD66	Uncharacterized protein	VPS52_CAEEL	33.71	9e-106	Vps52	Vacuolar protein sorting-associated protein 52 homolog
1044	A0A1B0CD67	Uncharacterized protein	VPS52_CAEEL	34.15	5e-09	Vps52	Vacuolar protein sorting-associated protein 52 homolog
1045	A0A1B0CD68	Uncharacterized protein	TXD17_DANRE	56.41	3e-20	Txd17	Thioredoxin domain-containing protein 17
1046	A0A1B0CD69	Uncharacterized protein	CCD43_DANRE	31.28	5e-17	Ccd43	Coiled-coil domain-containing protein 43
1047	A0A1B0CD70	Uncharacterized protein	UNC52_CAEEL	29.53	3e-11	Unc52	Basement membrane proteoglycan
1048	A0A1B0CD74	Uncharacterized protein	ABCA1_DICDI	25	2e-07	Abca1	ABC transporter A family member 1
1049	A0A1B0CD76	Uncharacterized protein	SQZ_DROME	52.66	2e-110	Sqz	Zinc finger protein squeeze
1050	A0A1B0CD77	Uncharacterized protein	SQZ_DROPS	56.41	3e-06	Sqz	Zinc finger protein squeeze
1051	A0A1B0CD79	Uncharacterized protein	TAF6_DROME	40.35	2e-07	Taf6	Transcription initiation factor TFIID subunit 6
1052	A0A1B0CD82	Uncharacterized protein	HIC2_DANRE	33.33	7e-10	Hic2	Hypermethylated in cancer 2 protein
1053	A0A1B0CD83	Uncharacterized protein	DMDA_DROME	82.58	0	Dys	Dystrophin, isoforms A/C/F/G/H
1054	A0A1B0CD84	Uncharacterized protein	FRU_DROME	39.86	2e-11	Fru	Sex determination protein fruitless
1055	A0A1B0CD85	Uncharacterized protein	TTKB_DROME	55.95	2e-70	Ttk	Protein tramtrack, beta isoform
1056	A0A1B0CD86	Uncharacterized protein	RAGP1_XENLA	26.24	5e-06	Ragp1	Ran GTPase-activating protein 1
1057	A0A1B0CD87	Uncharacterized protein	HHAT_DROME	31.66	6e-83	Rasp	Protein-cysteine N-palmitoyltransferase Rasp
1058	A0A1B0CD88	Uncharacterized protein	INSM1_XENLA	40.1	9e-34	Insm1	Insulinoma-associated protein 1
1059	A0A1B0CD89	Uncharacterized protein	ARP6_DROME	53.11	9e-154	Arp6	Actin-related protein 6
1060	A0A1B0CD91	Uncharacterized protein	PQE1_CAEEL	35.48	9e-40	Pqe1	Putative RNA exonuclease pqe-1
1061	A0A1B0CD93	Uncharacterized protein	OSBL9_XENTR	39.17	8e-15	Osbl9	Oxysterol-binding protein-related protein 9
1062	A0A1B0CD94	Uncharacterized protein	UBX_DROSI	52.34	5e-63	Ubx	Homeotic protein ultrabithorax
1063	A0A1B0CD95	Uncharacterized protein	KCNN_DROME	90.57	1e-136	Kcnn	Small conductance calcium-activated potassium channel protein
1064	A0A1B0CD98	Uncharacterized protein	ACSF2_DANRE	51.76	7e-63	Acsf2	Acyl-CoA synthetase family member 2, mitochondrial
1065	A0A1B0CD99	Uncharacterized protein	FAT_DROME	33.05	1e-08	Fat	Cadherin-related tumor suppressor
1066	A0A1B0CDA1	Uncharacterized protein	ADCY2_DROME	26.59	1e-13	Adcy2	Adenylate cyclase type 2
1067	A0A1B0CDA2	Uncharacterized protein	ADCY2_DROME	42.59	6e-09	Adcy2	Adenylate cyclase type 2
1068	A0A1B0CDA3	Uncharacterized protein	UGT3_PLEPL	30.51	1e-39	Ugt3	UDP-glucuronosyltransferase
1069	A0A1B0CDA4	Uncharacterized protein	OCT1_CAEEL	26.3	2e-47	2019-10-01	Organic cation transporter 1
1070	A0A1B0CDA5	Uncharacterized protein	DA_DROME	72.22	9e-63	Da	Protein daughterless
1071	A0A1B0CDA6	Uncharacterized protein	PDK_DROME	69.97	0	Pdk	[Pyruvate dehydrogenase (acetyl-transferring)] kinase, mitochondrial
1072	A0A1B0CDA7	Uncharacterized protein	FRL_DROME	67.98	0	Frl	Formin-like protein
1073	A0A1B0CDA8	Uncharacterized protein	CALM_TRYBG	31.54	4e-20	Calm	Calmodulin
1074	A0A1B0CDA9	Uncharacterized protein	E631_DROME	37.88	3e-09	E631	Calcium-binding protein E63-1
1075	A0A1B0CDB0	Uncharacterized protein	CDK12_DROME	56.68	0	Cdk12	Cyclin-dependent kinase 12
1076	A0A1B0CDB1	Uncharacterized protein	CAPON_DROME	79.01	1e-31	Capon	Capon-like protein
1077	A0A1B0CDB5	Uncharacterized protein	CHP1_CHICK	56.41	1e-63	Chp1	Calcineurin B homologous protein 1
1078	A0A1B0CDB6	Uncharacterized protein	YQOA_CAEEL	23.31	1e-16	Yqoa	Putative RNA-binding protein EEED8.10
1079	A0A1B0CDB7	Uncharacterized protein	EIF3G_BRUMA	37.65	9e-06	Eif3g	Eukaryotic translation initiation factor 3 subunit G
1080	A0A1B0CDB9	Uncharacterized protein	EF1A1_DROME	99.15	2e-79	Ef1a1	Elongation factor 1-alpha 1
1081	A0A1B0CDC0	Uncharacterized protein	EF1A1_DROME	100	4e-44	Ef1a1	Elongation factor 1-alpha 1
1082	A0A1B0CDC2	Uncharacterized protein	DFD_DROME	75	1e-36	Dfd	Homeotic protein deformed
1083	A0A1B0CDC3	Uncharacterized protein	REG2_DROME	38.28	2e-57	Reg2	Rhythmically expressed gene 2 protein
1084	A0A1B0CDC4	Uncharacterized protein	Y4775_DICDI	41.67	7e-17	Y4775	PH domain-containing protein DDB_G0274775
1085	A0A1B0CDC7	Uncharacterized protein	DPY30_DROME	61.9	6e-14	Dpy30	Protein dpy-30 homolog
1086	A0A1B0CDC8	Uncharacterized protein	MSS4_DROME	55.56	2e-28	Mss4	Guanine nucleotide exchange factor MSS4 homolog
1087	A0A1B0CDC9	Uncharacterized protein	GLMPB_XENLA	27.7	6e-35	Glmpb	Glycosylated lysosomal membrane protein B
1088	A0A1B0CDD1	Uncharacterized protein	CTCF_CHICK	22.32	2e-10	Ctcf	Transcriptional repressor CTCF
1089	A0A1B0CDD2	Uncharacterized protein	LSAMP_CHICK	32.98	3e-07	Lsamp	Limbic system-associated membrane protein
1090	A0A1B0CDD3	Uncharacterized protein	ARP10_DICDI	28.31	6e-44	Arp10	Actin-related protein 10
1091	A0A1B0CDD4	Uncharacterized protein	PAKM_DROME	95.34	0	Pakm	Serine/threonine-protein kinase PAK mbt
1092	A0A1B0CDD5	Uncharacterized protein	HEAT6_DANRE	29.55	6e-72	Heat6	HEAT repeat-containing protein 6
1093	A0A1B0CDD6	Uncharacterized protein	ANR39_DICDI	33.33	2e-27	Anr39	Ankyrin repeat domain-containing protein 39 homolog
1094	A0A1B0CDD8	Uncharacterized protein	SUZ2_DROME	75.86	9e-05	Suz2	Protein suppressor 2 of zeste
1095	A0A1B0CDE1	Uncharacterized protein	THOPL_DICDI	26.17	2e-48	Thopl	Thimet-like oligopeptidase
1096	A0A1B0CDE2	Uncharacterized protein	NETA_DROME	53.62	1e-124	Neta	Netrin-A
1097	A0A1B0CDE3	Uncharacterized protein	ZO71_XENLA	27.24	9e-12	Zo71	Oocyte zinc finger protein XlCOF7.1
1098	A0A1B0CDE8	Uncharacterized protein	S38AB_DANRE	39.66	1e-82	S38ab	Putative sodium-coupled neutral amino acid transporter 11
1099	A0A1B0CDE9	Uncharacterized protein	EGR1_XENTR	39.56	2e-15	Egr1	Early growth response protein 1
1100	A0A1B0CDF1	Uncharacterized protein	TGT_DROME	65.7	5e-77	Tgt	Queuine tRNA-ribosyltransferase catalytic subunit
1101	A0A1B0CDF2	Uncharacterized protein	BL1S1_DROME	72.57	2e-53	Bl1s1	Biogenesis of lysosome-related organelles complex 1 subunit 1
1102	A0A1B0CDF3	Uncharacterized protein	BL1S1_XENTR	70	2e-10	Bl1s1	Biogenesis of lysosome-related organelles complex 1 subunit 1
1103	A0A1B0CDF6	Uncharacterized protein	E75BB_DROME	97.96	2e-27	E75bb	Ecdysone-induced protein 75B, isoform B
1104	A0A1B0CDF7	Uncharacterized protein	E75BC_DROME	96.35	4e-83	E75bc	Ecdysone-induced protein 75B, isoforms C/D
1105	A0A1B0CDF8	Uncharacterized protein	SPB1_CHICK	66.04	2e-41	Spb1	pre-rRNA processing protein FTSJ3
1106	A0A1B0CDF9	Uncharacterized protein	SPB1_CHICK	56.42	8e-116	Spb1	pre-rRNA processing protein FTSJ3
1107	A0A1B0CDG0	Uncharacterized protein	WWOX_DANRE	32.65	1e-33	Wwox	WW domain-containing oxidoreductase
1108	A0A1B0CDG3	Uncharacterized protein	BGBP3_DROME	39.6	2e-19	Bgbp3	Gram-negative bacteria-binding protein 3
1109	A0A1B0CDG4	Uncharacterized protein	FOXK2_XENLA	39.42	6e-32	Foxk2	Forkhead box protein K2
1110	A0A1B0CDG6	Uncharacterized protein	BTBD6_XENLA	31.33	6e-39	Btbd6	BTB/POZ domain-containing protein 6
1111	A0A1B0CDG7	Uncharacterized protein	ANLN_DROME	31.07	2e-12	Scra	Anillin
1112	A0A1B0CDH0	Uncharacterized protein	CRBN_DROVI	32.74	2e-15	Crbn	Protein cereblon homolog
1113	A0A1B0CDH3	Uncharacterized protein	KCTD7_DANRE	44.57	2e-15	Kctd7	BTB/POZ domain-containing protein KCTD7
1114	A0A1B0CDH4	Uncharacterized protein	FACE2_DROME	53.68	2e-99	Sras	CAAX prenyl protease 2
1115	A0A1B0CDH5	Uncharacterized protein	DRE1_CAEEL	56.93	0	Dre1	F-box protein dre-1
1116	A0A1B0CDH6	Uncharacterized protein	CLP15_ANOGA	31.73	6e-34	Clp15	CLIP domain-containing serine protease B15
1117	A0A1B0CDH7	Uncharacterized protein	KALM_COTJA	26.74	4e-24	Kalm	Anosmin-1
1118	A0A1B0CDI1	Uncharacterized protein	HMOC_DROME	84.48	4e-27	Hmoc	Homeotic protein ocelliless
1119	A0A1B0CDI2	Uncharacterized protein	C43BP_DANRE	45.61	2e-37	C43bp	Collagen type IV alpha-3-binding protein
1120	A0A1B0CDI4	Uncharacterized protein	ABR_XENTR	27.91	1e-16	Abr	Active breakpoint cluster region-related protein
1121	A0A1B0CDI5	Uncharacterized protein	SDHF4_DROME	55.06	3e-23	Sdhf4	Succinate dehydrogenase assembly factor 4, mitochondrial
1122	A0A1B0CDI6	Uncharacterized protein	LUCI_LUCCR	30.36	3e-56	Luci	Luciferin 4-monooxygenase
1123	A0A1B0CDI7	Uncharacterized protein	AL7A1_CAEEL	52.08	3e-41	Al7a1	Putative aldehyde dehydrogenase family 7 member A1 homolog
1124	A0A1B0CDI8	Uncharacterized protein	RIO2_DICDI	56.91	1e-66	Rio2	Serine/threonine-protein kinase rio2
1125	A0A1B0CDJ0	Uncharacterized protein	ALKB_DICDI	32.12	4e-45	Alkb	Alpha-ketoglutarate-dependent dioxygenase alkB
1126	A0A1B0CDJ2	Uncharacterized protein	PAR1_CAEBR	88.24	1e-36	Par1	Serine/threonine-protein kinase par-1
1127	A0A1B0CDJ4	Uncharacterized protein	NCAH_DROME	41.71	8e-51	Nca	Neurocalcin homolog
1128	A0A1B0CDJ5	Uncharacterized protein	RT10_DROME	76.61	6e-71	Rt10	28S ribosomal protein S10, mitochondrial
1129	A0A1B0CDJ6	Uncharacterized protein	SETD3_CHICK	40.4	2e-64	Setd3	Histone-lysine N-methyltransferase setd3
1130	A0A1B0CDJ9	Uncharacterized protein	MOB1_DROME	94.88	3e-155	Mob1	MOB kinase activator-like 1
1131	A0A1B0CDK0	Uncharacterized protein	CU20_TENMO	60.81	4e-23	Acp20	Adult-specific cuticular protein ACP-20
1132	A0A1B0CDK1	Uncharacterized protein	CU19_LOCMI	67.19	1e-21	Cu19	Cuticle protein 19
1133	A0A1B0CDK2	Uncharacterized protein	ZG20_XENLA	29.41	7e-06	Zg20	Gastrula zinc finger protein xFG20-1
1134	A0A1B0CDK3	Uncharacterized protein	AT2B2_OREMO	65.74	9e-42	At2b2	Plasma membrane calcium-transporting ATPase 2
1135	A0A1B0CDK6	Uncharacterized protein	NDUS2_RECAM	76.35	0	Nad7	NADH-ubiquinone oxidoreductase 49 kDa subunit
1136	A0A1B0CDK7	Uncharacterized protein	SOX6_XENTR	80.91	7e-56	Sox6	Transcription factor Sox-6
1137	A0A1B0CDK9	Uncharacterized protein	CAMKI_MACNP	82.47	0	Camki	Calcium/calmodulin-dependent protein kinase type 1
1138	A0A1B0CDL0	Uncharacterized protein	SEM1A_SCHAM	47.52	2e-21	Sem1a	Semaphorin-1A
1139	A0A1B0CDL1	Uncharacterized protein	IF4G_DICDI	32.31	1e-35	Eif4g	Eukaryotic translation initiation factor 4 gamma
1140	A0A1B0CDL2	Uncharacterized protein	SQZ_DROME	37.75	6e-34	Sqz	Zinc finger protein squeeze
1141	A0A1B0CDL3	Uncharacterized protein	NCS2_CAEEL	63.89	1e-09	Ncs2	Neuronal calcium sensor 2
1142	A0A1B0CDL4	Uncharacterized protein	SPT2_DROME	40.45	2e-28	Spt2	Protein SPT2 homolog
1143	A0A1B0CDL5	Uncharacterized protein	RN141_DANRE	29.95	7e-40	Rn141	RING finger protein 141
1144	A0A1B0CDL6	Uncharacterized protein	POP7_DROME	37.12	2e-23	Pop7	Ribonuclease P protein subunit p20
1145	A0A1B0CDL7	Uncharacterized protein	DDX19_DROME	72.09	0	Dbp80	DEAD-box helicase Dbp80
1146	A0A1B0CDL8	Uncharacterized protein	TM147_DANRE	54.55	5e-78	Tm147	Transmembrane protein 147
1147	A0A1B0CDL9	Uncharacterized protein	BAF_DROME	77.78	8e-51	Baf	Barrier-to-autointegration factor
1148	A0A1B0CDM0	Uncharacterized protein	STRN_DICDI	37.47	2e-79	Strn	Striatin homolog
1149	A0A1B0CDM1	Uncharacterized protein	YRD6_CAEEL	31.92	1e-93	Yrd6	Uncharacterized protein K02A2.6
1150	A0A1B0CDM3	Uncharacterized protein	SAX3_CAEEL	28.72	4e-29	Sax3	Protein sax-3
1151	A0A1B0CDM4	Uncharacterized protein	PGPSA_DROME	44.17	1e-44	Pgpsa	Peptidoglycan-recognition protein SA
1152	A0A1B0CDM5	Uncharacterized protein	MAFA_DANRE	49.57	2e-27	Mafaa	Transcription factor MafAa
1153	A0A1B0CDM7	Uncharacterized protein	DOME_DROME	21.63	6e-07	Dome	Cytokine receptor
1154	A0A1B0CDM9	Uncharacterized protein	DOME_DROME	27.69	2e-71	Dome	Cytokine receptor
1155	A0A1B0CDN0	Uncharacterized protein	PEX19_CAEEL	33.55	2e-17	Pex19	Putative peroxisomal biogenesis factor 19
1156	A0A1B0CDN2	Uncharacterized protein	SEC24_DICDI	29.13	2e-100	Sec24	Protein transport protein SEC24
1157	A0A1B0CDN4	Uncharacterized protein	MCCB_DROME	75.47	0	Mccb	Probable methylcrotonoyl-CoA carboxylase beta chain, mitochondrial
1158	A0A1B0CDN6	Uncharacterized protein	SIN3_CAEEL	37.14	2e-17	Sin3	Paired amphipathic helix protein sin-3
1159	A0A1B0CDN7	Uncharacterized protein	PATH_DROME	61.08	3e-60	Path	Proton-coupled amino acid transporter-like protein pathetic
1160	A0A1B0CDN8	Uncharacterized protein	FUCO_DROME	62.22	0	Fuca	Putative alpha-L-fucosidase
1161	A0A1B0CDN9	Uncharacterized protein	FAH2A_DANRE	47.64	7e-63	Fah2a	Fatty-acid amide hydrolase 2-A
1162	A0A1B0CDP1	Uncharacterized protein	SLIT_DROME	32.56	2e-06	Sli	Protein slit
1163	A0A1B0CDP2	Uncharacterized protein	PRI2_DROME	43.19	1e-71	Pri2	DNA primase large subunit
1164	A0A1B0CDP3	Uncharacterized protein	ODR4_DROME	23.54	3e-20	Odr4	Protein odr-4 homolog
1165	A0A1B0CDP4	Uncharacterized protein	PRI2_DROME	34.04	2e-17	Pri2	DNA primase large subunit
1166	A0A1B0CDP5	Uncharacterized protein	STO1_CAEEL	32.18	1e-25	Sto1	Stomatin-1
1167	A0A1B0CDP6	Uncharacterized protein	NU188_XENTR	25.18	3e-70	Nu188	Nucleoporin NUP188 homolog
1168	A0A1B0CDQ0	Uncharacterized protein	VDDP4_VESVU	43.06	2e-30	Vddp4	Venom dipeptidyl peptidase 4
1169	A0A1B0CDQ1	Uncharacterized protein	PIAA_DICDI	28.81	3e-34	Piaa	Protein pianissimo A
1170	A0A1B0CDQ2	Uncharacterized protein	SMRCD_DROME	48.6	0	Etl1	SWI/SNF-related matrix-associated actin-dependent regulator of chromatin subfamily A containing DEAD/H box 1 homolog
1171	A0A1B0CDQ4	Uncharacterized protein	Y5078_DROME	55.22	1e-32	Y5078	Uncharacterized protein CG45078
1172	A0A1B0CDQ7	Uncharacterized protein	RM37_CHICK	25.95	6e-25	Rm37	39S ribosomal protein L37, mitochondrial
1173	A0A1B0CDQ8	Uncharacterized protein	TIPT_DROME	44.39	0	Tio	Protein tiptop
1174	A0A1B0CDR0	Uncharacterized protein	TNNC3_DROME	87.74	4e-94	Tnnc3	Troponin C, isoform 3
1175	A0A1B0CDR2	Uncharacterized protein	CP4CU_BLAGE	32.28	2e-95	Cp4cu	Cytochrome P450 4c21
1176	A0A1B0CDR5	Uncharacterized protein	LHX9_ASTFA	50.77	1e-42	Lhx9	LIM/homeobox protein Lhx9
1177	A0A1B0CDR6	Uncharacterized protein	RT07_DROME	58.05	3e-80	Mrps7	28S ribosomal protein S7, mitochondrial
1178	A0A1B0CDR7	Uncharacterized protein	DAW1_XENTR	27.56	4e-07	Daw1	Dynein assembly factor with WDR repeat domains 1
1179	A0A1B0CDR8	Uncharacterized protein	TONSL_DANRE	23.5	1e-06	Tonsl	Tonsoku-like protein
1180	A0A1B0CDS0	Uncharacterized protein	TBCK_CHICK	25.63	5e-12	Tbck	TBC domain-containing protein kinase-like protein
1181	A0A1B0CDS1	Uncharacterized protein	MFSD8_DANRE	21.47	1e-07	Mfsd8	Major facilitator superfamily domain-containing protein 8
1182	A0A1B0CDS2	Uncharacterized protein	ELF1_DROME	49.37	2e-93	Grh	Protein grainyhead
1183	A0A1B0CDS3	Uncharacterized protein	BRK1B_XENLA	86.57	1e-37	Brk1b	Probable protein BRICK1-B
1184	A0A1B0CDS4	Uncharacterized protein	CNO11_DANRE	50.75	2e-116	Cno11	CCR4-NOT transcription complex subunit 11
1185	A0A1B0CDS5	Uncharacterized protein	TBC8B_DANRE	39.83	6e-151	Tbc8b	TBC1 domain family member 8B
1186	A0A1B0CDS6	Uncharacterized protein	PC_DROME	73.97	7e-28	Pc	Polycomb group protein Pc
1187	A0A1B0CDS7	Uncharacterized protein	POMT1_DROME	57.09	0	Pomt1	Protein O-mannosyltransferase 1
1188	A0A1B0CDS8	Uncharacterized protein	DRL_DANRE	27.68	4e-15	Drl	Zinc finger protein draculin
1189	A0A1B0CDS9	Uncharacterized protein	KLFL_DROME	94.74	2e-36	Klfl	Krueppel-like factor luna
1190	A0A1B0CDT0	Uncharacterized protein	ZO20_XENLA	26.23	5e-21	Zo20	Oocyte zinc finger protein XlCOF20
1191	A0A1B0CDT2	Uncharacterized protein	ZN865_XENTR	26.51	4e-08	Zn865	Zinc finger protein 865
1192	A0A1B0CDT3	Uncharacterized protein	TNKS_DROME	32.35	2e-06	Tnks	Tankyrase
1193	A0A1B0CDT4	Uncharacterized protein	CUT1_CAEEL	22.61	4e-06	Cut1	Cuticlin-1
1194	A0A1B0CDT5	Uncharacterized protein	SUV39_DROPS	35.22	1e-32	Suv39	Histone-lysine N-methyltransferase Su(var)3-9
1195	A0A1B0CDT7	Uncharacterized protein	ATPB2_DROME	45.2	9e-102	Nrv2	Sodium/potassium-transporting ATPase subunit beta-2
1196	A0A1B0CDT8	Uncharacterized protein	UBR1_DROME	57.02	9e-32	Ubr1	E3 ubiquitin-protein ligase UBR1
1197	A0A1B0CDT9	Uncharacterized protein	NSUN4_XENTR	32.35	4e-06	Nsun4	5-methylcytosine rRNA methyltransferase NSUN4
1198	A0A1B0CDU0	Uncharacterized protein	PICO_DROME	37.78	8e-29	Picot	Putative inorganic phosphate cotransporter
1199	A0A1B0CDU1	Uncharacterized protein	FPPS_CHICK	36.92	3e-70	Fdps	Farnesyl pyrophosphate synthase
1200	A0A1B0CDU4	Uncharacterized protein	PDC10_CHICK	52.71	2e-62	Pdc10	Programmed cell death protein 10
1201	A0A1B0CDU5	Uncharacterized protein	WDR55_AEDAE	58.27	1e-163	Wdr55	WD repeat-containing protein 55 homolog
1202	A0A1B0CDU6	Uncharacterized protein	SP34_APIME	27.7	4e-29	Sp34	Venom serine protease 34
1203	A0A1B0CDU8	Uncharacterized protein	CU198_LOCMI	72.22	5e-27	Cu198	Cuticle protein 19.8
1204	A0A1B0CDV0	Uncharacterized protein	MSL2_DROME	34	1e-17	Msl2	E3 ubiquitin-protein ligase msl-2
1205	A0A1B0CDV1	Uncharacterized protein	CHCH7_XENTR	43.75	6e-16	Chch7	Coiled-coil-helix-coiled-coil-helix domain-containing protein 7
1206	A0A1B0CDV2	Uncharacterized protein	DSCR3_DICDI	43.42	5e-87	Dscr3	Down syndrome critical region protein 3 homolog
1207	A0A1B0CDV5	Uncharacterized protein	MGN_DROME	93.88	2e-100	Mgn	Protein mago nashi
1208	A0A1B0CDV6	Uncharacterized protein	UBIA1_DROME	73.79	2e-107	Heix	UbiA prenyltransferase domain-containing protein 1 homolog
1209	A0A1B0CDV7	Uncharacterized protein	MOX11_DROME	54.76	1e-41	Mox11	MOXD1 homolog 1
1210	A0A1B0CDV8	Uncharacterized protein	CCH1R_DROME	61.86	1e-39	Cch1r	Neuropeptide CCHamide-1 receptor
1211	A0A1B0CDV9	Uncharacterized protein	CCH1R_DROME	67.27	2e-43	Cch1r	Neuropeptide CCHamide-1 receptor
1212	A0A1B0CDW0	Uncharacterized protein	ASATR_DROME	77.11	0	Asatr	Tau-tubulin kinase homolog Asator
1213	A0A1B0CDW1	Uncharacterized protein	RXRAB_DANRE	50.88	6e-14	Rxrab	Retinoic acid receptor RXR-alpha-B
1214	A0A1B0CDW3	Uncharacterized protein	FOXN4_DANRE	75.21	3e-54	Foxn4	Forkhead box protein N4
1215	A0A1B0CDW4	Uncharacterized protein	RM27_DICDI	36.25	5e-08	Rm27	Probable 39S ribosomal protein L27, mitochondrial
1216	A0A1B0CDW5	Uncharacterized protein	LAMC_DROME	53.73	0	Lamc	Lamin-C
1217	A0A1B0CDW6	Uncharacterized protein	RAB19_XENTR	58.38	8e-69	Rab19	Ras-related protein Rab-19
1218	A0A1B0CDW7	Uncharacterized protein	MYO1A_CHICK	42.73	4e-24	Myo1a	Unconventional myosin-Ia
1219	A0A1B0CDW8	Uncharacterized protein	XFIN_XENLA	31.82	1e-07	Xfin	Zinc finger protein Xfin
1220	A0A1B0CDW9	Uncharacterized protein	MRP1_CHICK	33.33	7e-07	Abcc1	Multidrug resistance-associated protein 1
1221	A0A1B0CDX0	Uncharacterized protein	PIHD1_XENLA	36.94	9e-62	Pihd1	PIH1 domain-containing protein 1
1222	A0A1B0CDX3	Uncharacterized protein	ADRL_DROME	32.2	8e-24	Adrl	Adiponectin receptor protein
1223	A0A1B0CDX4	Uncharacterized protein	GR101_LYMST	64	0.0002	Gr101	G-protein coupled receptor GRL101
1224	A0A1B0CDX5	Uncharacterized protein	VP16B_DROME	34.59	3e-74	Vp16b	Vacuolar protein sorting-associated protein 16B
1225	A0A1B0CDX6	Uncharacterized protein	ASCC3_CHICK	52.03	0	Ascc3	Activating signal cointegrator 1 complex subunit 3
1226	A0A1B0CDX7	Uncharacterized protein	RM32_DROME	50.27	2e-56	Rm32	39S ribosomal protein L32, mitochondrial
1227	A0A1B0CDY0	Uncharacterized protein	VPS72_DROME	56.1	5e-125	Vps72	Vacuolar protein sorting-associated protein 72 homolog
1228	A0A1B0CDY1	Uncharacterized protein	SFXN1_CAEEL	48.84	5e-87	Sfxn1	Putative sideroflexin-1.1
1229	A0A1B0CDY2	Uncharacterized protein	GON1_CAEEL	28.52	5e-26	Gon1	A disintegrin and metalloproteinase with thrombospondin motifs gon-1
1230	A0A1B0CDY3	Uncharacterized protein	EMS_DROME	61.14	2e-73	Ems	Homeotic protein empty spiracles
1231	A0A1B0CDY6	Uncharacterized protein	CADM2_XENTR	26.55	5e-11	Cadm2	Cell adhesion molecule 2
1232	A0A1B0CDY8	Uncharacterized protein	PI4KB_XENTR	64.33	8e-75	Pi4kb	Phosphatidylinositol 4-kinase beta
1233	A0A1B0CDY9	Uncharacterized protein	PUF68_DROME	33.02	6e-09	Puf68	Poly(U)-binding-splicing factor half pint
1234	A0A1B0CDZ1	Uncharacterized protein	ESN_DROPS	42.93	9e-43	Esn	Protein espinas
1235	A0A1B0CDZ2	Uncharacterized protein	PRIC1_ANOGA	32.32	3e-08	Pric1	Protein prickle
1236	A0A1B0CDZ3	Uncharacterized protein	PEPE_DROME	58.47	1e-91	Pepe	Probable alpha-aspartyl dipeptidase
1237	A0A1B0CDZ7	Uncharacterized protein	DEGS1_CHICK	55.35	2e-129	Degs1	Sphingolipid delta(4)-desaturase DES1
1238	A0A1B0CDZ8	Uncharacterized protein	DIUX_DROME	69.15	5e-39	Dh31	Diuretic hormone class 2
1239	A0A1B0CE01	Uncharacterized protein	XFIN_XENLA	29.49	2e-08	Xfin	Zinc finger protein Xfin
1240	A0A1B0CE02	Uncharacterized protein	WDR44_XENLA	59.66	0	Wdr44	WD repeat-containing protein 44
1241	A0A1B0CE03	Uncharacterized protein	GNA1_DROME	68.66	1e-98	Gna1	Probable glucosamine 6-phosphate N-acetyltransferase
1242	A0A1B0CE04	Uncharacterized protein	CCND1_XENLA	42.65	6e-64	Ccnd1	G1/S-specific cyclin-D1
1243	A0A1B0CE06	Uncharacterized protein	MSMO1_DANRE	26.67	2e-11	Msmo1	Methylsterol monooxygenase 1
1244	A0A1B0CE07	Uncharacterized protein	ASATR_DROME	50	1e-25	Asatr	Tau-tubulin kinase homolog Asator
1245	A0A1B0CE08	Uncharacterized protein	CRVP_TRILK	38	2e-09	Crvp	CRISP/Allergen/PR-1
1246	A0A1B0CE09	Uncharacterized protein	MUT7_AEDAE	44.69	5e-56	Mut7	Exonuclease mut-7 homolog
1247	A0A1B0CE10	Uncharacterized protein	BARK_DROME	47.46	2e-12	Bark	Protein bark beetle
1248	A0A1B0CE11	Uncharacterized protein	SSPA_DICDI	29.03	4e-12	Sppa	Probable sphingosine-1-phosphate phosphatase
1249	A0A1B0CE12	Uncharacterized protein	MRP1_CHICK	27.96	3e-14	Abcc1	Multidrug resistance-associated protein 1
1250	A0A1B0CE14	Uncharacterized protein	DOM_DROME	34.46	3e-19	Dom	Helicase domino
1251	A0A1B0CE16	Uncharacterized protein	PX24C_DICDI	31.35	2e-22	Px24c	PXMP2/4 family protein 3
1252	A0A1B0CE18	Uncharacterized protein	SRRM4_DANRE	64.44	9e-06	Srrm4	Serine/arginine repetitive matrix protein 4
1253	A0A1B0CE19	Uncharacterized protein	MRM3_DROME	40.5	5e-24	Mrm3	rRNA methyltransferase 3, mitochondrial
1254	A0A1B0CE20	Uncharacterized protein	UBE2N_DROME	37.82	4e-24	Ben	Ubiquitin-conjugating enzyme E2 N
1255	A0A1B0CE21	Uncharacterized protein	TM135_XENLA	34.45	4e-81	Tm135	Transmembrane protein 135
1256	A0A1B0CE22	Uncharacterized protein	TR112_DROME	54.84	4e-40	Tr112	Multifunctional methyltransferase subunit TRM112-like protein
1257	A0A1B0CE24	Uncharacterized protein	PI51B_CHICK	57.42	5e-169	Pi51b	Phosphatidylinositol 4-phosphate 5-kinase type-1 beta
1258	A0A1B0CE26	Uncharacterized protein	BAZ2B_CHICK	48.53	6e-12	Baz2b	Bromodomain adjacent to zinc finger domain protein 2B
1259	A0A1B0CE30	Uncharacterized protein	CBR4_DANRE	39	3e-44	Cbr4	Carbonyl reductase family member 4
1260	A0A1B0CE31	Uncharacterized protein	BUN2_DROME	61.27	3e-52	Bun	Protein bunched, class 2/F/G isoform
1261	A0A1B0CE32	Uncharacterized protein	BUN2_DROME	84.62	4e-27	Bun	Protein bunched, class 2/F/G isoform
1262	A0A1B0CE33	Uncharacterized protein	ATM_DROME	26.5	2e-167	Tefu	Serine/threonine-protein kinase ATM
1263	A0A1B0CE35	Uncharacterized protein	MYPT1_CHICK	56.52	0.0002	Mypt1	Protein phosphatase 1 regulatory subunit 12A
1264	A0A1B0CE36	Uncharacterized protein	MYPT1_DANRE	51.52	2e-18	Mypt1	Protein phosphatase 1 regulatory subunit 12A
1265	A0A1B0CE37	Uncharacterized protein	SCRIB_DANRE	38.33	8e-06	Scrib	Protein scribble homolog
1266	A0A1B0CE40	Uncharacterized protein	AGK_DANRE	31.85	3e-55	Agk	Acylglycerol kinase, mitochondrial
1267	A0A1B0CE45	Uncharacterized protein	GNAQ_HOMAM	75	3e-94	Gnaq	Guanine nucleotide-binding protein G(q) subunit alpha
1268	A0A1B0CE46	Uncharacterized protein	AMPH_CHICK	44.44	6e-07	Amph	Amphiphysin
1269	A0A1B0CE47	Uncharacterized protein	ENC_DROME	31.08	5e-07	Enc	Protein encore
1270	A0A1B0CE48	Uncharacterized protein	RM52_DROPS	59.04	4e-29	Rm52	39S ribosomal protein L52, mitochondrial
1271	A0A1B0CE49	Uncharacterized protein	LIPA_CAEEL	72.66	1e-59	Lipa	Liprin-alpha
1272	A0A1B0CE50	Uncharacterized protein	LIPA_CAEEL	42.99	6e-150	Lipa	Liprin-alpha
1273	A0A1B0CE51	Uncharacterized protein	LIPA_CAEEL	42.35	2e-11	Lipa	Liprin-alpha
1274	A0A1B0CE54	Uncharacterized protein	RUS1_DICDI	40.67	1e-70	Rus1	RUS1 family protein homolog
1275	A0A1B0CE55	Uncharacterized protein	HANG_DROME	33.68	6e-11	Hang	Zinc finger protein hangover
1276	A0A1B0CE56	Uncharacterized protein	NOP14_DROME	34.48	2e-71	Nop14	Nucleolar protein 14 homolog
1277	A0A1B0CE57	Uncharacterized protein	NOP14_DROME	47.96	1e-18	Nop14	Nucleolar protein 14 homolog
1278	A0A1B0CE61	Uncharacterized protein	NUP88_DROME	40.03	8e-142	Nup88	Nuclear pore complex protein Nup88
1279	A0A1B0CE62	Uncharacterized protein	PLCE1_CAEEL	48.72	2e-33	Plce1	1-phosphatidylinositol 4,5-bisphosphate phosphodiesterase epsilon-1
1280	A0A1B0CE66	Uncharacterized protein	DFP3_ANTMY	33.81	2e-15	Dfp3	Putative defense protein 3
1281	A0A1B0CE68	Uncharacterized protein	S35F2_XENTR	37.45	9e-48	S35f2	Solute carrier family 35 member F2
1282	A0A1B0CE69	Uncharacterized protein	GRAU_DROME	28.21	4e-52	Grau	Transcription factor grauzone
1283	A0A1B0CE71	Uncharacterized protein	GRAU_DROME	29	3e-62	Grau	Transcription factor grauzone
1284	A0A1B0CE72	Uncharacterized protein	ADH2_CERCO	26.53	6e-31	Adh2	Alcohol dehydrogenase 2
1285	A0A1B0CE73	Uncharacterized protein	TBH1_DROME	66.97	1e-159	Tbh	Tyramine beta-hydroxylase
1286	A0A1B0CE75	Uncharacterized protein	NCOA7_CHICK	50.94	4e-27	Ncoa7	Nuclear receptor coactivator 7
1287	A0A1B0CE80	Uncharacterized protein	NU133_DROME	45.04	0	Nu133	Nuclear pore complex protein Nup133
1288	A0A1B0CE82	Uncharacterized protein	TSN31_DANRE	47.95	2e-41	Tsn31	Tetraspanin-31
1289	A0A1B0CE83	Uncharacterized protein	UTPP_CAEEL	45.92	1e-71	Utpp	Uridine and thymidine phosphorylase
1290	A0A1B0CE84	Uncharacterized protein	SPAG1_DANRE	30.88	2e-07	Spag1	Sperm-associated antigen 1A
1291	A0A1B0CE85	Uncharacterized protein	AMPN_CHICK	31.28	7e-51	Anpep	Aminopeptidase Ey
1292	A0A1B0CE87	Uncharacterized protein	DS_DROME	29.98	3e-58	Ds	Protein dachsous
1293	A0A1B0CE88	Uncharacterized protein	MD2L1_DICDI	38.27	2e-45	Md2l1	Mitotic spindle assembly checkpoint protein MAD2A
1294	A0A1B0CE90	Uncharacterized protein	RL27A_DROME	69.46	8e-77	Rl27a	60S ribosomal protein L27a
1295	A0A1B0CE91	Uncharacterized protein	Y8206_DICDI	29.21	6e-21	Y8206	Probable zinc transporter protein DDB_G0282067
1296	A0A1B0CE96	Uncharacterized protein	MYNN_XENLA	44.2	4e-34	Mynn	Myoneurin
1297	A0A1B0CE98	Uncharacterized protein	DCTN5_DICDI	46.99	1e-58	Dyne	Dynactin subunit 5
1298	A0A1B0CE99	Uncharacterized protein	NU205_DROME	38.1	0	Nu205	Nuclear pore complex protein Nup205
1299	A0A1B0CEA1	Uncharacterized protein	VP33_APLCA	33.83	4e-37	Vp33	Vesicle-associated membrane protein/synaptobrevin-binding protein
1300	A0A1B0CEA3	Uncharacterized protein	VPS4_DICDI	62.05	0	Vps4	Vacuolar protein sorting-associated protein 4
1301	A0A1B0CEA4	Uncharacterized protein	RHG29_DANRE	30.59	4e-17	Rhg29	Rho GTPase-activating protein 29
1302	A0A1B0CEA7	Uncharacterized protein	RNOY_CRAGI	37.82	2e-39	Rnoy	Ribonuclease Oy
1303	A0A1B0CEA8	Uncharacterized protein	SH3BG_DROME	73.73	5e-60	Sh3bg	SH3 domain-binding glutamic acid-rich protein homolog
1304	A0A1B0CEA9	Uncharacterized protein	UGT3_PLEPL	27.02	3e-42	Ugt3	UDP-glucuronosyltransferase
1305	A0A1B0CEB0	Uncharacterized protein	UGT58_CAEEL	28.57	1e-37	Ugt58	Putative UDP-glucuronosyltransferase ugt-58
1306	A0A1B0CEB1	Uncharacterized protein	FCP3C_DROME	41.61	2e-36	Fcp3c	Follicle cell protein 3C-1
1307	A0A1B0CEB2	Uncharacterized protein	GSTT1_CHICK	30.1	3e-23	Gstt1	Glutathione S-transferase theta-1
1308	A0A1B0CEB3	Uncharacterized protein	CTR1_ANOGA	31.25	8e-41	Chym1	Chymotrypsin-1
1309	A0A1B0CEB4	Uncharacterized protein	CC149_XENLA	41.18	8e-13	Cc149	Coiled-coil domain-containing protein 149
1310	A0A1B0CEB5	Uncharacterized protein	TMC3_CHICK	46.97	2e-15	Tmc3	Transmembrane channel-like protein 3
1311	A0A1B0CEB6	Uncharacterized protein	LAMC1_DROME	62.87	0	Lanb2	Laminin subunit gamma-1
1312	A0A1B0CEB7	Uncharacterized protein	ACXE_DROME	28.92	1e-10	Acxe	Adenylyl cyclase X E
1313	A0A1B0CEB9	Uncharacterized protein	YKK7_CAEEL	26.21	6e-12	Ykk7	Uncharacterized F-box/LRR-repeat protein C02F5.7
1314	A0A1B0CEC0	Uncharacterized protein	FXL15_DANRE	26.58	3e-07	Fxl15	F-box/LRR-repeat protein 15
1315	A0A1B0CEC1	Uncharacterized protein	UBR3_DROME	48.48	2e-14	Ubr3	E3 ubiquitin-protein ligase Ubr3
1316	A0A1B0CEC2	Uncharacterized protein	UBR3_DROME	73.2	4e-67	Ubr3	E3 ubiquitin-protein ligase Ubr3
1317	A0A1B0CEC4	Uncharacterized protein	SF3B4_CAEEL	80.09	6e-127	Sf3b4	Splicing factor 3B subunit 4
1318	A0A1B0CEC5	Uncharacterized protein	HARB1_XENLA	29	6e-19	Harb1	Putative nuclease HARBI1
1319	A0A1B0CEC6	Uncharacterized protein	CWC15_DROME	65	8e-88	Cwc15	Protein CWC15 homolog
1320	A0A1B0CEC9	Uncharacterized protein	S7A14_DANRE	45.15	2e-163	S7a14	Probable cationic amino acid transporter
1321	A0A1B0CED2	Uncharacterized protein	SMG9_SALSA	28.23	3e-16	Smg9	Protein SMG9
1322	A0A1B0CED5	Uncharacterized protein	SUP9_CAEEL	36.49	7e-09	Sup9	Two pore potassium channel protein sup-9
1323	A0A1B0CED6	Uncharacterized protein	PDE11_DROME	29.17	8e-06	Pde11	Dual 3',5'-cyclic-AMP and -GMP phosphodiesterase 11
1324	A0A1B0CED7	Uncharacterized protein	APC_XENLA	52.31	2e-13	Apc	Adenomatous polyposis coli homolog
1325	A0A1B0CEE1	Uncharacterized protein	GSTT1_MANSE	33.54	2e-18	Gst1	Glutathione S-transferase 1
1326	A0A1B0CEE3	Uncharacterized protein	Y2R2_DROME	28.26	6e-07	Y2r2	Putative 115 kDa protein in type-1 retrotransposable element R1DM
1327	A0A1B0CEE5	Uncharacterized protein	GDL_DROME	64.57	1e-74	Gdl	Gonadal protein gdl
1328	A0A1B0CEE7	Uncharacterized protein	LOZEN_DROME	83.19	1e-63	Lozen	Protein lozenge
1329	A0A1B0CEE8	Uncharacterized protein	2ABA_DROME	94.59	3e-155	Tws	Protein phosphatase PP2A 55 kDa regulatory subunit
1330	A0A1B0CEF0	Uncharacterized protein	UN93L_DROME	71.28	4e-101	Un93l	UNC93-like protein
1331	A0A1B0CEF1	Uncharacterized protein	RTJK_DROFU	30.39	1e-11	Rtjk	RNA-directed DNA polymerase from mobile element jockey
1332	A0A1B0CEF2	Uncharacterized protein	NX22A_DANRE	73.4	5e-43	Nx22a	Homeobox protein Nkx-2.2a
1333	A0A1B0CEF3	Uncharacterized protein	DDX24_DICDI	40	1e-129	Ddx24	ATP-dependent RNA helicase ddx24
1334	A0A1B0CEF5	Uncharacterized protein	LSM3_DICDI	73.56	1e-40	Lsm3	Probable U6 snRNA-associated Sm-like protein LSm3
1335	A0A1B0CEF9	Uncharacterized protein	SANT_PLAFV	40.44	1e-21	Sant	S-antigen protein
1336	A0A1B0CEG3	Uncharacterized protein	VPS15_DICDI	32.16	1e-23	Vps15	Probable serine/threonine-protein kinase vps15
1337	A0A1B0CEG4	Uncharacterized protein	ECSIT_DROME	48.29	3e-127	Ecsit	Evolutionarily conserved signaling intermediate in Toll pathway, mitochondrial
1338	A0A1B0CEG5	Uncharacterized protein	HEM3_DICDI	47.04	6e-78	Hemc	Porphobilinogen deaminase
1339	A0A1B0CEG6	Uncharacterized protein	ARS_HEMPU	30	2e-23	Ars	Arylsulfatase
1340	A0A1B0CEG7	Uncharacterized protein	SOX2_XENTR	57.89	3e-53	Sox2	Transcription factor Sox-2
1341	A0A1B0CEG9	Uncharacterized protein	COXZ_RECAM	54.86	1e-65	Ctag	Cytochrome c oxidase assembly protein ctaG
1342	A0A1B0CEH2	Uncharacterized protein	RN_DROME	37.5	1e-09	Rn	Zinc finger protein rotund
1343	A0A1B0CEH4	Uncharacterized protein	AVE_DROME	58.42	1e-35	Ave	Protein aveugle
1344	A0A1B0CEH6	Uncharacterized protein	AVE_DROME	50.98	5e-25	Ave	Protein aveugle
1345	A0A1B0CEH8	Uncharacterized protein	STK11_XENLA	57.31	2e-150	Stk11	Serine/threonine-protein kinase stk11
1346	A0A1B0CEH9	Uncharacterized protein	INT5_DROME	38.83	0	Int5	Integrator complex subunit 5
1347	A0A1B0CEI0	Uncharacterized protein	INT5_DROME	32.85	5e-16	Int5	Integrator complex subunit 5
1348	A0A1B0CEI2	Uncharacterized protein	FTN_DROME	39.23	9e-41	Fln	Flightin
1349	A0A1B0CEI3	Uncharacterized protein	KCNQ1_SQUAC	40.4	2e-14	Kcnq1	Potassium voltage-gated channel subfamily KQT member 1
1350	A0A1B0CEI4	Uncharacterized protein	RPN2_CAEEL	37.04	4e-50	Rpn2	Dolichyl-diphosphooligosaccharide--protein glycosyltransferase subunit 2
1351	A0A1B0CEI5	Uncharacterized protein	AMOS_DROME	74.19	2e-23	Amos	Basic helix-loop-helix transcription factor amos
1352	A0A1B0CEI6	Uncharacterized protein	S12A9_XENLA	42.91	0	S12a9	Solute carrier family 12 member 9
1353	A0A1B0CEI7	Uncharacterized protein	DDX23_DICDI	46.38	1e-172	Helb2	ATP-dependent RNA helicase ddx23
1354	A0A1B0CEI8	Uncharacterized protein	ZMAT5_DANRE	37.38	1e-21	Zmat5	Zinc finger matrin-type protein 5
1355	A0A1B0CEI9	Uncharacterized protein	ANR52_DANRE	22.77	3e-08	Anr52	Serine/threonine-protein phosphatase 6 regulatory ankyrin repeat subunit C
1356	A0A1B0CEJ0	Uncharacterized protein	UBXN4_CAEEL	29.29	1e-13	Ubxn4	UBX domain-containing protein 4
1357	A0A1B0CEJ3	Uncharacterized protein	ELBOW_DROME	38.53	2e-60	Elb	Zinc finger protein Elbow
1358	A0A1B0CEJ4	Uncharacterized protein	LHX1_XENLA	41.67	3e-11	Lhx1	LIM/homeobox protein Lhx1
1359	A0A1B0CEJ5	Uncharacterized protein	SLIT_DROME	27.84	5e-09	Sli	Protein slit
1360	A0A1B0CEJ6	Uncharacterized protein	PDIA6_DROME	56.19	7e-33	Pdia6	Protein disulfide-isomerase A6 homolog
1361	A0A1B0CEJ7	Uncharacterized protein	SEN2_CHICK	33.33	2e-20	Tsen2	tRNA-splicing endonuclease subunit Sen2
1362	A0A1B0CEJ8	Uncharacterized protein	TGO1_DROME	32.72	1e-19	Tgo1	Transport and Golgi organization protein 1
1363	A0A1B0CEJ9	Uncharacterized protein	TMM53_DANRE	23.97	5e-07	Tmm53	Transmembrane protein 53
1364	A0A1B0CEK1	Uncharacterized protein	SHC1_XENLA	42.59	1e-91	Shc1	SHC-transforming protein 1
1365	A0A1B0CEK2	Uncharacterized protein	HTR5B_XENTR	47.36	0	Htr5b	HEAT repeat-containing protein 5B
1366	A0A1B0CEK3	Uncharacterized protein	EYS_DROME	27.41	2e-07	Eys	Protein eyes shut
1367	A0A1B0CEK5	Uncharacterized protein	RAB5B_CHICK	85.48	2e-65	Rab5b	Ras-related protein Rab-5B
1368	A0A1B0CEK6	Uncharacterized protein	AP4A_CAEEL	42.42	9e-32	Ap4a	Bis(5'-nucleosyl)-tetraphosphatase [asymmetrical]
1369	A0A1B0CEK8	Uncharacterized protein	PWP1_DROME	46.37	2e-131	Pwp1	Periodic tryptophan protein 1 homolog
1370	A0A1B0CEK9	Uncharacterized protein	TEKT4_XENLA	34.08	2e-61	Tekt4	Tektin-4
1371	A0A1B0CEL1	Uncharacterized protein	XDH_DROME	60.34	0	Xdh	Xanthine dehydrogenase
1372	A0A1B0CEL2	Uncharacterized protein	COX20_DANRE	39.81	7e-22	Cox20	Cytochrome c oxidase assembly protein COX20, mitochondrial
1373	A0A1B0CEL5	Uncharacterized protein	SYSC_DANRE	70.56	0	Sysc	Serine--tRNA ligase, cytoplasmic
1374	A0A1B0CEL6	Uncharacterized protein	ASF1_DROME	74.55	2e-112	Asf1	Histone chaperone asf1
1375	A0A1B0CEL8	Uncharacterized protein	TT39B_XENLA	42.25	1e-143	Tt39b	Tetratricopeptide repeat protein 39B
1376	A0A1B0CEL9	Uncharacterized protein	NT5D3_XENLA	42.17	2e-59	Nt5d3	5'-nucleotidase domain-containing protein 3
1377	A0A1B0CEM0	Uncharacterized protein	XFIN_XENLA	22.92	6e-07	Xfin	Zinc finger protein Xfin
1378	A0A1B0CEM2	Uncharacterized protein	GLS2_CAEEL	46.8	1e-172	Gls2	Putative glutaminase 2
1379	A0A1B0CEM3	Uncharacterized protein	PXDN_XENTR	32.52	7e-09	Pxdn	Peroxidasin
1380	A0A1B0CEM5	Uncharacterized protein	C28A5_DROME	41.03	5e-145	C28a5	Probable cytochrome P450 28a5
1381	A0A1B0CEM6	Uncharacterized protein	TRE12_DROME	24.87	6e-22	Tre12	Facilitated trehalose transporter Tret1-2 homolog
1382	A0A1B0CEM7	Uncharacterized protein	TORSO_BOMMO	38.89	1e-59	Torso	Tyrosine-protein kinase receptor torso
1383	A0A1B0CEM9	Uncharacterized protein	CEPU1_CHICK	25.8	6e-21	Cepu1	Protein CEPU-1
1384	A0A1B0CEN0	Uncharacterized protein	MOX11_DROME	50	3e-19	Mox11	MOXD1 homolog 1
1385	A0A1B0CEN1	Uncharacterized protein	NRF6_CAEEL	25.54	3e-22	Nrf6	Nose resistant to fluoxetine protein 6
1386	A0A1B0CEN2	Uncharacterized protein	ATK_DROME	22.83	8e-14	Atk	Protein artichoke
1387	A0A1B0CEN3	Uncharacterized protein	RFC1_DROME	23.14	8e-09	Gnf1	Replication factor C subunit 1
1388	A0A1B0CEN6	Uncharacterized protein	HDGR2_XENLA	39.58	1e-12	Hdgr2	Hepatoma-derived growth factor-related protein 2
1389	A0A1B0CEN7	Uncharacterized protein	TS101_DICDI	35	7e-14	Ts101	ESCRT-I complex subunit tsg101
1390	A0A1B0CEN8	Uncharacterized protein	BOULE_DROME	80.23	1e-89	Bol	Protein boule
1391	A0A1B0CEP1	Uncharacterized protein	HRD1_DROME	73.58	2e-133	Sip3	E3 ubiquitin-protein ligase HRD1
1392	A0A1B0CEP2	Uncharacterized protein	SP3_CHICK	38.33	8e-09	Sp3	Transcription factor Sp3
1393	A0A1B0CEP3	Uncharacterized protein	T2FA_DROME	74.47	4e-137	T2fa	General transcription factor IIF subunit 1
1394	A0A1B0CEP4	Uncharacterized protein	TRET1_CULQU	30.49	2e-54	Tret1	Facilitated trehalose transporter Tret1
1395	A0A1B0CEP5	Uncharacterized protein	DGAT1_DICDI	29.03	1e-23	Dgat1	Diacylglycerol O-acyltransferase 1
1396	A0A1B0CEP7	Uncharacterized protein	RNO_DROME	27.06	2e-38	Rno	PHD finger protein rhinoceros
1397	A0A1B0CEP8	Uncharacterized protein	CHIT_BRUMA	53.49	4e-08	Chit	Endochitinase
1398	A0A1B0CEP9	Uncharacterized protein	CBPA1_ANOGA	44.36	6e-128	Cbpa1	Zinc carboxypeptidase A 1
1399	A0A1B0CEQ0	Uncharacterized protein	MSTAB_DROME	30.1	7e-26	Mstab	SET domain-containing protein SmydA-8, isoform B
1400	A0A1B0CEQ1	Uncharacterized protein	YOT2_CAEEL	30.98	3e-59	Yot2	Uncharacterized protein ZK632.2
1401	A0A1B0CEQ2	Uncharacterized protein	SC5A7_DROME	84.17	0	Sc5a7	High-affinity choline transporter 1
1402	A0A1B0CEQ4	Uncharacterized protein	Y8236_DICDI	21.85	9e-08	Y8236	TPR-containing protein DDB_G0280363
1403	A0A1B0CEQ6	Uncharacterized protein	FGFR1_DROME	47.06	2e-22	Htl	Fibroblast growth factor receptor homolog 1
1404	A0A1B0CEQ8	Uncharacterized protein	PCX1_TAKRU	41.49	2e-18	Pcx1	Pecanex-like protein 1
1405	A0A1B0CER0	Uncharacterized protein	PCX_DROME	54.17	2e-10	Pcx	Protein pecanex
1406	A0A1B0CER1	Uncharacterized protein	PCE_TACTR	33.02	6e-44	Pce	Proclotting enzyme
1407	A0A1B0CER2	Uncharacterized protein	GLUCL_DROME	86.36	4e-06	Glucl	Glutamate-gated chloride channel
1408	A0A1B0CER3	Uncharacterized protein	TRET1_BOMMO	33.95	6e-91	Tret1	Facilitated trehalose transporter Tret1
1409	A0A1B0CER4	Uncharacterized protein	PIEZO_DROME	40.57	4e-16	Piezo	Piezo-type mechanosensitive ion channel component
1410	A0A1B0CER5	Uncharacterized protein	UBCD1_DROME	46.9	4e-39	Eff	Ubiquitin-conjugating enzyme E2-17 kDa
1411	A0A1B0CER6	Uncharacterized protein	ELP3_DROME	84.37	0	Elp3	Probable elongator complex protein 3
1412	A0A1B0CER8	Uncharacterized protein	UBC7_CAEEL	52.03	2e-40	Ubc7	Probable ubiquitin-conjugating enzyme E2 7
1413	A0A1B0CER9	Uncharacterized protein	CAD87_DROME	25.44	6e-10	Cad87	Cadherin-87A
1414	A0A1B0CES0	Uncharacterized protein	LOPAP_LONON	26.74	5e-13	Lopap	Lopap
1415	A0A1B0CES1	Uncharacterized protein	LOPAP_LONON	25.68	7e-13	Lopap	Lopap
1416	A0A1B0CES2	Uncharacterized protein	LAZA_SCHAM	29.23	1e-13	Laza	Lazarillo protein
1417	A0A1B0CES4	Uncharacterized protein	BICC_DROME	52.05	4e-14	Bicc	Protein bicaudal C
1418	A0A1B0CES5	Uncharacterized protein	RL7_DROME	75.89	3e-60	Rpl7	60S ribosomal protein L7
1419	A0A1B0CES7	Uncharacterized protein	TOP2_DROME	63.74	8e-80	Top2	DNA topoisomerase 2
1420	A0A1B0CES9	Uncharacterized protein	CP134_DROME	27.47	5e-66	Cp134	Probable cytochrome P450 313a4
1421	A0A1B0CET1	Uncharacterized protein	NPRL2_DROME	59.3	1e-152	Nprl2	GATOR complex protein NPRL2
1422	A0A1B0CET3	Uncharacterized protein	ABHD2_DROME	73.72	0	Hydr2	Abhydrolase domain-containing protein 2
1423	A0A1B0CEU0	Uncharacterized protein	XDH_DICDI	30.9	3e-166	Xdh	Xanthine dehydrogenase
1424	A0A1B0CEU1	Uncharacterized protein	CP6D1_MUSDO	30.05	2e-19	Cp6d1	Cytochrome P450 6d1
1425	A0A1B0CEU2	Uncharacterized protein	SEH1A_XENLA	70.22	5e-88	Seh1a	Nucleoporin SEH1-A
1426	A0A1B0CEU4	Uncharacterized protein	F206_DROME	55.93	3e-32	F206	FAM206 family protein CG9288
1427	A0A1B0CEU5	Uncharacterized protein	F206_DROME	56.63	2e-50	F206	FAM206 family protein CG9288
1428	A0A1B0CEU6	Uncharacterized protein	FUCTC_DROME	38.38	1e-66	Fuctc	Alpha-(1,3)-fucosyltransferase C
1429	A0A1B0CEU7	Uncharacterized protein	PTK7_DROMO	45.91	0	Ptk7	Tyrosine-protein kinase-like otk
1430	A0A1B0CEU8	Uncharacterized protein	GLPK5_CHICK	27.07	2e-08	Gk5	Putative glycerol kinase 5
1431	A0A1B0CEV0	Uncharacterized protein	ZG57_XENLA	37.86	3e-23	Zg57	Gastrula zinc finger protein XlCGF57.1
1432	A0A1B0CEV1	Uncharacterized protein	ZBT24_DANRE	34.65	2e-12	Zbt24	Zinc finger and BTB domain-containing protein 24
1433	A0A1B0CEV4	Uncharacterized protein	ORN_DICDI	48.91	1e-24	Orn	Probable oligoribonuclease
1434	A0A1B0CEV6	Uncharacterized protein	GPAT3_DANRE	40.18	1e-44	Gpat3	Glycerol-3-phosphate acyltransferase 3
1435	A0A1B0CEV7	Uncharacterized protein	CUD2_SCHGR	52.1	5e-26	Cud2	Endocuticle structural glycoprotein SgAbd-2
1436	A0A1B0CEV9	Uncharacterized protein	UGT3_PLEPL	39.48	5e-60	Ugt3	UDP-glucuronosyltransferase
1437	A0A1B0CEW0	Uncharacterized protein	EST1_CULPI	35	8e-39	Est1	Esterase B1
1438	A0A1B0CEW3	Uncharacterized protein	ZIG8_CAEEL	31.63	4e-08	Zig8	Zwei Ig domain protein zig-8
1439	A0A1B0CEW4	Uncharacterized protein	PLXA4_DANRE	41.6	0	Plxa4	Plexin-A4
1440	A0A1B0CEW5	Uncharacterized protein	MPCP_CHOFU	70.21	8e-166	Mpcp	Phosphate carrier protein, mitochondrial
1441	A0A1B0CEW6	Uncharacterized protein	PURB_DANRE	47.81	2e-74	Purb	Transcriptional activator protein Pur-beta
1442	A0A1B0CEW7	Uncharacterized protein	MBNL3_TAKRU	38.33	5e-06	Mbnl3	Muscleblind-like protein 3
1443	A0A1B0CEW8	Uncharacterized protein	BURS_DROME	88.43	2e-77	Burs	Bursicon
1444	A0A1B0CEW9	Uncharacterized protein	GDF8_ANSAN	31.96	1e-56	Mstn	Growth/differentiation factor 8
1445	A0A1B0CEX1	Uncharacterized protein	ARS_HEMPU	30.21	1e-22	Ars	Arylsulfatase
1446	A0A1B0CEX2	Uncharacterized protein	ARS_STRPU	40	9e-12	Ars	Arylsulfatase
1447	A0A1B0CEX4	Uncharacterized protein	ATK_DROME	49.22	0	Atk	Protein artichoke
1448	A0A1B0CEX6	Uncharacterized protein	PLC12_CAEEL	27.46	1e-20	Plc12	Putative 1-acyl-sn-glycerol-3-phosphate acyltransferase acl-12
1449	A0A1B0CEX7	Uncharacterized protein	USF1_XENBO	50	9e-27	Usf1	Upstream stimulatory factor 1
1450	A0A1B0CEX9	Uncharacterized protein	ACO11_TRINI	51.83	2e-104	D11ds	Acyl-CoA Delta(11) desaturase
1451	A0A1B0CEY0	Uncharacterized protein	ACO11_CHORO	33.9	1e-41	Aco11	Acyl-CoA Delta(11) desaturase
1452	A0A1B0CEY1	Uncharacterized protein	ACO11_SPOLI	50.34	4e-109	Aco11	Acyl-CoA Delta(11) desaturase
1453	A0A1B0CEY2	Uncharacterized protein	ACO11_TRINI	57.55	2e-146	D11ds	Acyl-CoA Delta(11) desaturase
1454	A0A1B0CEY3	Uncharacterized protein	ECHM_DICDI	31.05	9e-28	Echs1	Probable enoyl-CoA hydratase, mitochondrial
1455	A0A1B0CEY4	Uncharacterized protein	SKEL1_DROME	45.97	1e-28	Skel1	Protein Skeletor, isoforms B/C
1456	A0A1B0CEY7	Uncharacterized protein	NUP98_DROME	42.76	0	Nup98	Nuclear pore complex protein Nup98-Nup96
1457	A0A1B0CEY8	Uncharacterized protein	NUP98_DROME	39.41	7e-24	Nup98	Nuclear pore complex protein Nup98-Nup96
1458	A0A1B0CEZ2	Uncharacterized protein	HLES_DROME	33.42	4e-36	Hles	Protein hairless
1459	A0A1B0CEZ4	Uncharacterized protein	OGFD1_DROME	38.67	7e-95	Sud1	Prolyl 3-hydroxylase sudestada1
1460	A0A1B0CEZ8	Uncharacterized protein	TRET1_DROGR	39.78	3e-23	Tret1	Facilitated trehalose transporter Tret1
1461	A0A1B0CF00	Uncharacterized protein	SMN_DROME	48.65	3e-06	Smn	Survival motor neuron protein
1462	A0A1B0CF07	Uncharacterized protein	XFIN_XENLA	27.52	3e-13	Xfin	Zinc finger protein Xfin
1463	A0A1B0CF09	Uncharacterized protein	PPO2_DROME	75	1e-70	Ppo2	Phenoloxidase 2
1464	A0A1B0CF10	Uncharacterized protein	HNRPK_CHICK	54.05	0.0003	Hnrpk	Heterogeneous nuclear ribonucleoprotein K
1465	A0A1B0CF11	Uncharacterized protein	CLVS1_XENLA	30.67	2e-38	Clvs1	Clavesin-1
1466	A0A1B0CF13	Uncharacterized protein	RBP1_DROME	76.32	2e-15	Rbp1	RNA-binding protein 1
1467	A0A1B0CF15	Uncharacterized protein	SSH_DROME	38.54	1e-24	Ssh	Protein phosphatase Slingshot
1468	A0A1B0CF17	Uncharacterized protein	TOLIP_CHICK	50.54	7e-76	Tolip	Toll-interacting protein
1469	A0A1B0CF18	Uncharacterized protein	ALAT2_XENLA	55.33	0	Gpt2	Alanine aminotransferase 2
1470	A0A1B0CF20	Uncharacterized protein	ADF1_DROME	32.91	4e-07	Adf1	Transcription factor Adf-1
1471	A0A1B0CF21	Uncharacterized protein	RNP1A_XENLA	41.01	5e-29	Rnp1a	RNA-binding protein with serine-rich domain 1-A
1472	A0A1B0CF22	Uncharacterized protein	ZFY26_DROME	32.52	8e-49	Zfy26	Zinc finger FYVE domain-containing protein 26 homolog
1473	A0A1B0CF26	Uncharacterized protein	UBTD2_DANRE	51.08	7e-75	Ubtd2	Ubiquitin domain-containing protein 2
1474	A0A1B0CF28	Uncharacterized protein	ATPL2_CAEEL	38.81	4e-11	Atpl2	Probable ATP synthase subunit g 2, mitochondrial
1475	A0A1B0CF29	Uncharacterized protein	YQ58_CAEEL	33.77	5e-23	Yq58	Uncharacterized protein C16C10.8
1476	A0A1B0CF30	Uncharacterized protein	UBXN3_CAEEL	28.06	1e-27	Ubxn3	UBX domain-containing protein 3
1477	A0A1B0CF31	Uncharacterized protein	KRUP_DROME	41.01	5e-09	Krup	Protein krueppel
1478	A0A1B0CF32	Uncharacterized protein	FIS1_DROME	45.27	4e-24	Fis1	Mitochondrial fission 1 protein
1479	A0A1B0CF35	Uncharacterized protein	CUE2A_XENLA	33.73	5e-36	Cue2a	CUE domain-containing protein 2-A
1480	A0A1B0CF37	Uncharacterized protein	NEGR1_CHICK	24.77	1e-10	Negr1	Neuronal growth regulator 1
1481	A0A1B0CF39	Uncharacterized protein	NT56_DROME	61.78	0	Nt56	Lethal(2)neighbour of tid protein
1482	A0A1B0CF40	Uncharacterized protein	KCNAW_DROME	94.54	0	Shaw	Potassium voltage-gated channel protein Shaw
1483	A0A1B0CF41	Uncharacterized protein	LIP3_DROME	36.07	1e-16	Lip3	Lipase 3
1484	A0A1B0CF44	Uncharacterized protein	BICD_DROME	70.72	1e-152	Bicd	Protein bicaudal D
1485	A0A1B0CF45	Uncharacterized protein	NPRL2_DROME	38.12	3e-81	Nprl2	GATOR complex protein NPRL2
1486	A0A1B0CF46	Uncharacterized protein	YQOA_CAEEL	21.01	3e-07	Yqoa	Putative RNA-binding protein EEED8.10
1487	A0A1B0CF47	Uncharacterized protein	GPTC4_XENLA	35.42	5e-35	Gptc4	G patch domain-containing protein 4
1488	A0A1B0CF51	Uncharacterized protein	ACSF2_DANRE	39.71	4e-128	Acsf2	Acyl-CoA synthetase family member 2, mitochondrial
1489	A0A1B0CF52	Uncharacterized protein	ACSF2_DANRE	37.57	2e-119	Acsf2	Acyl-CoA synthetase family member 2, mitochondrial
1490	A0A1B0CF54	Uncharacterized protein	ODF3A_XENLA	29.14	4e-08	Odf3	Outer dense fiber protein 3
1491	A0A1B0CF55	Uncharacterized protein	WRB_DANRE	22.76	9e-10	Wrb	Tail-anchored protein insertion receptor WRB
1492	A0A1B0CF58	Uncharacterized protein	FEM2_CAEEL	29.82	5e-27	Fem2	Protein phosphatase fem-2
1493	A0A1B0CF60	Uncharacterized protein	STAT_DROME	28.62	2e-24	Stat	Signal transducer and transcription activator
1494	A0A1B0CF61	Uncharacterized protein	ULK3_XENLA	45.23	1e-131	Ulk3	Serine/threonine-protein kinase ULK3
1495	A0A1B0CF62	Uncharacterized protein	OTOP_DROME	26.35	1e-52	Otop	Proton channel OtopLc
1496	A0A1B0CF63	Uncharacterized protein	TRFR_CHICK	30.92	8e-13	Trhr	Thyrotropin-releasing hormone receptor
1497	A0A1B0CF64	Uncharacterized protein	ACCO1_DICMU	24.7	2e-06	Aco	1-aminocyclopropane-1-carboxylate oxidase
1498	A0A1B0CF67	Uncharacterized protein	MICAL_DROME	77.65	3e-58	Mical	[F-actin]-monooxygenase Mical
1499	A0A1B0CF69	Uncharacterized protein	NR1AA_DANRE	36.41	0	Nr1aa	Neurexin-1a
1500	A0A1B0CF70	Uncharacterized protein	PLPL2_CAEEL	39.38	1e-53	Plpl2	Patanin-like phospholipase domain-containing protein
1501	A0A1B0CF71	Uncharacterized protein	AMPL_CAEEL	42.59	7e-122	Ampl	Leucine aminopeptidase 1
1502	A0A1B0CF73	Uncharacterized protein	UBP32_DROME	41.89	1e-07	Ubp32	Ubiquitin carboxyl-terminal hydrolase 32
1503	A0A1B0CF76	Uncharacterized protein	RCC1_DROME	46.19	1e-112	Rcc1	Regulator of chromosome condensation
1504	A0A1B0CF77	Uncharacterized protein	RCC1_XENLA	48.89	9e-08	Rcc1	Regulator of chromosome condensation
1505	A0A1B0CF78	Uncharacterized protein	SSK_BOMMO	32.32	5e-08	Ssk	Protein snakeskin
1506	A0A1B0CF80	Uncharacterized protein	DLG1_DANRE	37.5	5e-07	Dlg1	Disks large homolog 1
1507	A0A1B0CF81	Uncharacterized protein	TFP8L_DROME	50	2e-27	Tfp8l	Tumor necrosis factor alpha-induced protein 8-like protein
1508	A0A1B0CF82	Uncharacterized protein	RN126_XENTR	34.67	3e-42	Rn126	E3 ubiquitin-protein ligase RNF126
1509	A0A1B0CF84	Uncharacterized protein	DDX47_CAEEL	69.04	0	Ddx47	Putative ATP-dependent RNA helicase T26G10.1
1510	A0A1B0CF85	Uncharacterized protein	PP4R2_DROME	71.68	3e-90	Pp4r2	Serine/threonine-protein phosphatase 4 regulatory subunit 2
1511	A0A1B0CF86	Uncharacterized protein	PXDC2_XENLA	44.84	5e-72	Pxdc2	Plexin domain-containing protein 2
1512	A0A1B0CF87	Uncharacterized protein	CP135_DANRE	28.24	1e-18	Cp135	Centrosomal protein of 135 kDa
1513	A0A1B0CF88	Uncharacterized protein	EQST_ACTEQ	52.17	2e-07	Eqst	Equistatin
1514	A0A1B0CF89	Uncharacterized protein	OCTL_DROME	27.68	4e-67	Orct2	Organic cation transporter-like protein
1515	A0A1B0CF92	Uncharacterized protein	UBP46_DANRE	28.74	1e-28	Usp46	Ubiquitin carboxyl-terminal hydrolase 46
1516	A0A1B0CF94	Uncharacterized protein	ADH_DROLE	32.39	8e-33	Adh	Alcohol dehydrogenase
1517	A0A1B0CF96	Uncharacterized protein	ADH1_CERCO	38.29	2e-39	Adh1	Alcohol dehydrogenase 1
1518	A0A1B0CFA2	Uncharacterized protein	DDX19_DROME	43.33	3e-09	Dbp80	DEAD-box helicase Dbp80
1519	A0A1B0CFA4	Uncharacterized protein	ARX_DANRE	83.87	4e-10	Arx	Aristaless-related homeobox protein
1520	A0A1B0CFA5	Uncharacterized protein	DCA11_CAEEL	33.15	2e-53	Dca11	DDB1- and CUL4-associated factor 11 homolog
1521	A0A1B0CFA7	Uncharacterized protein	IMP2L_DANRE	57.63	1e-44	Imp2l	Mitochondrial inner membrane protease subunit 2
1522	A0A1B0CFA8	Uncharacterized protein	EFTU_RECAM	77.14	3e-09	Tufa	Elongation factor Tu, mitochondrial
1523	A0A1B0CFA9	Uncharacterized protein	WECH_DROME	40.96	0	Wech	Protein wech
1524	A0A1B0CFB5	Uncharacterized protein	NACA_DROME	77.42	1e-100	Naca	Nascent polypeptide-associated complex subunit alpha
1525	A0A1B0CFB7	Uncharacterized protein	CAPTC_DICDI	28.71	3e-41	Captc	Uncharacterized CDP-alcohol phosphatidyltransferase class-I family protein 3
1526	A0A1B0CFC4	Uncharacterized protein	YRD6_CAEEL	38.07	4e-34	Yrd6	Uncharacterized protein K02A2.6
1527	A0A1B0CFC7	Uncharacterized protein	CP4S3_DROME	47.78	1e-55	Cp4s3	Probable cytochrome P450 4s3
1528	A0A1B0CFC8	Uncharacterized protein	RM49_DROME	52.03	3e-56	Rm49	Probable 39S ribosomal protein L49, mitochondrial
1529	A0A1B0CFC9	Uncharacterized protein	BM1LA_DANRE	49.57	6e-68	Bm1la	Breast cancer metastasis-suppressor 1-like protein-A
1530	A0A1B0CFD1	Uncharacterized protein	M3KSL_DROME	49.21	2e-06	M3ksl	Mitogen-activated protein kinase kinase kinase
1531	A0A1B0CFD5	Uncharacterized protein	NINAB_DROME	44.91	8e-173	Ninab	Carotenoid isomerooxygenase
1532	A0A1B0CFE1	Uncharacterized protein	IF2A_DROME	79.22	2e-132	If2a	Eukaryotic translation initiation factor 2 subunit 1
1533	A0A1B0CFE2	Uncharacterized protein	RT4I1_DANRE	28.38	1e-25	Rt4i1	Reticulon-4-interacting protein 1 homolog, mitochondrial
1534	A0A1B0CFE3	Uncharacterized protein	TEY_DROME	44.39	7e-26	Tey	Protein Teyrha-meyrha
1535	A0A1B0CFE5	Uncharacterized protein	OSG1_CAEEL	26.98	1e-22	Osg1	Rho guanine nucleotide exchange factor osg-1
1536	A0A1B0CFE9	Uncharacterized protein	BOK_CHICK	34.13	2e-26	Bok	Bcl-2-related ovarian killer protein
1537	A0A1B0CFF0	Uncharacterized protein	NEP1_DROME	58.5	1e-96	Nep1	Ribosomal RNA small subunit methyltransferase NEP1
1538	A0A1B0CFF1	Uncharacterized protein	FSH_DROME	68	3e-08	Fsh	Homeotic protein female sterile
1539	A0A1B0CFF5	Uncharacterized protein	BOK_CHICK	27.39	7e-10	Bok	Bcl-2-related ovarian killer protein
1540	A0A1B0CFF6	Uncharacterized protein	TMTC3_DROME	65.45	4e-139	Tmtc3	Transmembrane and TPR repeat-containing protein CG4050
1541	A0A1B0CFF7	Uncharacterized protein	IKZF1_ONCMY	36.96	3e-10	Ikzf1	DNA-binding protein Ikaros
1542	A0A1B0CFF8	Uncharacterized protein	EMS_DROME	71.79	7e-49	Ems	Homeotic protein empty spiracles
1543	A0A1B0CFF9	Uncharacterized protein	LSD2_DROME	61.17	7e-86	Lsd2	Lipid storage droplets surface-binding protein 2
1544	A0A1B0CFG0	Uncharacterized protein	RS13_DROME	92.72	2e-100	Rps13	40S ribosomal protein S13
1545	A0A1B0CFG4	Uncharacterized protein	MMSA_AEDAE	85.06	0	Mmsa	Probable methylmalonate-semialdehyde dehydrogenase [acylating], mitochondrial
1546	A0A1B0CFG8	Uncharacterized protein	IDE_DROME	27.74	2e-112	Ide	Insulin-degrading enzyme
1547	A0A1B0CFG9	Uncharacterized protein	RME6_DROME	41.69	2e-135	Rme6	Receptor-mediated endocytosis protein 6 homolog
1548	A0A1B0CFH0	Uncharacterized protein	DPH7_DICDI	33.15	2e-50	Wdr85	Diphthine methyltransferase homolog
1549	A0A1B0CFH1	Uncharacterized protein	SRP72_CAEEL	41.61	8e-19	Srp72	Signal recognition particle subunit SRP72
1550	A0A1B0CFH2	Uncharacterized protein	TRI33_DANRE	33.8	4e-36	Tri33	E3 ubiquitin-protein ligase TRIM33
1551	A0A1B0CFH3	Uncharacterized protein	CC115_DANRE	30.94	4e-07	Cc115	Coiled-coil domain-containing protein 115
1552	A0A1B0CFH4	Uncharacterized protein	ATG7_CHICK	42.84	0	Atg7	Ubiquitin-like modifier-activating enzyme ATG7
1553	A0A1B0CFH6	Uncharacterized protein	XPO2_DROME	28.79	1e-09	Xpo2	Exportin-2
1554	A0A1B0CFH8	Uncharacterized protein	SSU72_CHICK	62.83	7e-86	Ssu72	RNA polymerase II subunit A C-terminal domain phosphatase SSU72
1555	A0A1B0CFH9	Uncharacterized protein	Y0700_DICDI	40.12	2e-69	Y0700	Probable serine/threonine-protein kinase DDB_G0286841
1556	A0A1B0CFI1	Uncharacterized protein	RAB10_CHICK	84.92	3e-108	Rab10	Ras-related protein Rab-10
1557	A0A1B0CFI3	Uncharacterized protein	SCYL1_XENLA	28.61	4e-30	Scyl1	N-terminal kinase-like protein
1558	A0A1B0CFI4	Uncharacterized protein	MOV10_CHICK	36.28	2e-107	Mov10	Putative helicase MOV-10
1559	A0A1B0CFI5	Uncharacterized protein	CP4CU_BLAGE	30.57	3e-68	Cp4cu	Cytochrome P450 4c21
1560	A0A1B0CFI6	Uncharacterized protein	CP4C1_BLADI	33.8	2e-68	Cp4c1	Cytochrome P450 4C1
1561	A0A1B0CFI7	Uncharacterized protein	HGH1_DROME	51.14	4e-126	Hgh1	Protein HGH1 homolog
1562	A0A1B0CFI8	Uncharacterized protein	HARB1_DANRE	22.19	5e-09	Harb1	Putative nuclease HARBI1
1563	A0A1B0CFJ2	Uncharacterized protein	RAB7_EPICO	36.15	5e-11	Rab7	Ras-related protein rab7
1564	A0A1B0CFJ4	Uncharacterized protein	CLVS1_XENLA	29.27	6e-26	Clvs1	Clavesin-1
1565	A0A1B0CFJ5	Uncharacterized protein	FRMD8_XENLA	47.58	2e-31	Frmd8	FERM domain-containing protein 8
1566	A0A1B0CFJ6	Uncharacterized protein	RTJK_DROME	30.48	8e-50	Pol	RNA-directed DNA polymerase from mobile element jockey
1567	A0A1B0CFJ7	Uncharacterized protein	EPHA4_CHICK	29.4	4e-51	Epha4	Ephrin type-A receptor 4
1568	A0A1B0CFK0	Uncharacterized protein	RG1BA_DANRE	30.51	6e-56	Rg1ba	Ras-GEF domain-containing family member 1B-A
1569	A0A1B0CFK1	Uncharacterized protein	SCO2_DANRE	41.3	2e-57	Sco2	Protein SCO2 homolog, mitochondrial
1570	A0A1B0CFK2	Uncharacterized protein	SP28D_DROME	52.31	9e-17	Sp28d	Serine protease inhibitor 28Dc
1571	A0A1B0CFK6	Uncharacterized protein	DS_DROME	23.93	2e-16	Ds	Protein dachsous
1572	A0A1B0CFK8	Uncharacterized protein	TRISS_DROME	55.74	3e-14	Triss	Trissin
1573	A0A1B0CFK9	Uncharacterized protein	CCAP_DROME	49.47	2e-27	Ccap	Cardioactive peptide
1574	A0A1B0CFL0	Uncharacterized protein	RG92B_DROME	54.79	1e-74	Rg92b	Rho GTPase-activating protein 92B
1575	A0A1B0CFL1	Uncharacterized protein	MANBA_CAEEL	36.04	1e-14	Manba	Probable beta-mannosidase
1576	A0A1B0CFL2	Uncharacterized protein	DAAF5_DROME	34.41	4e-144	Daaf5	Dynein assembly factor 5, axonemal
1577	A0A1B0CFL6	Uncharacterized protein	TRIO_DANRE	35.56	3e-46	Trio	Triple functional domain protein
1578	A0A1B0CFL8	Uncharacterized protein	XYLT_DROPS	52.88	0	Oxt	Xylosyltransferase oxt
1579	A0A1B0CFM2	Uncharacterized protein	WDR83_XENTR	45.45	4e-95	Wdr83	WD repeat domain-containing protein 83
1580	A0A1B0CFM8	Uncharacterized protein	INT6_DROME	70.37	0.0002	Int6	Integrator complex subunit 6
1581	A0A1B0CFM9	Uncharacterized protein	GADL1_XENTR	48.32	2e-42	Gadl1	Acidic amino acid decarboxylase GADL1
1582	A0A1B0CFN1	Uncharacterized protein	CLVS1_XENLA	40	8e-10	Clvs1	Clavesin-1
1583	A0A1B0CFN2	Uncharacterized protein	CLP1L_CHICK	46.04	1e-152	Clp1l	Cleft lip and palate transmembrane protein 1-like protein
1584	A0A1B0CFN3	Uncharacterized protein	IYD1H_CAEEL	44.85	3e-56	Iyd1h	Iodotyrosine dehalogenase 1 homolog
1585	A0A1B0CFN4	Uncharacterized protein	U428_DROME	62.12	3e-49	U428	UPF0428 protein CG16865
1586	A0A1B0CFN5	Uncharacterized protein	HGD_DROME	76.32	0	Hgo	Homogentisate 1,2-dioxygenase
1587	A0A1B0CFN8	Uncharacterized protein	ATAT1_DROME	59.57	2e-27	Atat1	Alpha-tubulin N-acetyltransferase 1
1588	A0A1B0CFP0	Uncharacterized protein	GTPB1_XENLA	72.29	0	Gtpb1	GTP-binding protein 1
1589	A0A1B0CFP2	Uncharacterized protein	STAN_DROME	63.68	0	Stan	Protocadherin-like wing polarity protein stan
1590	A0A1B0CFP3	Uncharacterized protein	RAB3_DROME	94.09	3e-155	Rab3	Ras-related protein Rab-3
1591	A0A1B0CFP4	Uncharacterized protein	TDRD7_XENTR	21.43	2e-19	Tdrd7	Tudor domain-containing protein 7
1592	A0A1B0CFP5	Uncharacterized protein	CROC_DROME	70.87	5e-95	Croc	Fork head domain-containing protein crocodile
1593	A0A1B0CFP6	Uncharacterized protein	BARH2_DROME	45.6	3e-25	Barh2	Homeobox protein B-H2
1594	A0A1B0CFP8	Uncharacterized protein	ERAL1_SALSA	30.3	7e-55	Eral1	GTPase Era, mitochondrial
1595	A0A1B0CFQ0	Uncharacterized protein	ZO28_XENLA	23.85	2e-07	Zo28	Oocyte zinc finger protein XlCOF28
1596	A0A1B0CFQ3	Uncharacterized protein	CED7_CAEEL	37.5	1e-08	Ced7	ABC transporter ced-7
1597	A0A1B0CFQ6	Uncharacterized protein	REG5_DROME	52.38	3e-08	Reg5	Rhythmically expressed gene 5 protein
1598	A0A1B0CFQ7	Uncharacterized protein	S38AB_DANRE	39.29	5e-83	S38ab	Putative sodium-coupled neutral amino acid transporter 11
1599	A0A1B0CFQ8	Uncharacterized protein	SYDE_DROME	70.66	6e-63	Syde	Rho GTPase-activating protein 100F
1600	A0A1B0CFY2	Uncharacterized protein	NDUS3_RECAM	55.38	7e-80	Nad9	NADH-ubiquinone oxidoreductase subunit 9
1601	A0A1B0CFY3	Uncharacterized protein	HRD1_DROME	47.5	5e-08	Sip3	E3 ubiquitin-protein ligase HRD1
1602	A0A1B0CFY4	Uncharacterized protein	NDUS3_RECAM	71.43	8e-12	Nad9	NADH-ubiquinone oxidoreductase subunit 9
1603	A0A1B0CFZ1	Uncharacterized protein	PICO_DROME	31.59	4e-51	Picot	Putative inorganic phosphate cotransporter
1604	A0A1B0CFZ2	Uncharacterized protein	PICO_DROME	31.97	1e-42	Picot	Putative inorganic phosphate cotransporter
1605	A0A1B0CFZ3	Uncharacterized protein	VGL2A_DANRE	29.6	1e-70	Vgl2a	Vesicular glutamate transporter 2.1
1606	A0A1B0CFZ4	Uncharacterized protein	HACL1_DICDI	39.45	9e-134	Hacl1	Probable 2-hydroxyacyl-CoA lyase 1
1607	A0A1B0CFZ7	Uncharacterized protein	SPON1_CHICK	24.94	2e-27	Spon1	Spondin-1
1608	A0A1B0CG00	Uncharacterized protein	GAGXE_DROME	30.59	9e-17	Gagxe	Nucleic-acid-binding protein from transposon X-element
1609	A0A1B0CG03	Uncharacterized protein	SC5A8_XENTR	35.42	2e-92	Sc5a8	Sodium-coupled monocarboxylate transporter 1
1610	A0A1B0CG05	Uncharacterized protein	ZG46_XENLA	36.32	1e-24	Zg46	Gastrula zinc finger protein XlCGF46.1
1611	A0A1B0CG06	Uncharacterized protein	SYFM_DROME	58.9	0	Syfm	Probable phenylalanine--tRNA ligase, mitochondrial
1612	A0A1B0CG07	Uncharacterized protein	ATU_DROME	67.66	4e-126	Atu	Another transcription unit protein
1613	A0A1B0CG08	Uncharacterized protein	UMPS_DROME	50.52	3e-165	Umps	Uridine 5'-monophosphate synthase
1614	A0A1B0CG09	Uncharacterized protein	ABCG8_DICDI	37.23	7e-30	Abcg8	ABC transporter G family member 8
1615	A0A1B0CG10	Uncharacterized protein	ABCG8_DICDI	31.64	6e-61	Abcg8	ABC transporter G family member 8
1616	A0A1B0CG11	Uncharacterized protein	TKRA_DICDI	39.77	3e-54	Tkra	Probable 2-ketogluconate reductase
1617	A0A1B0CG12	Uncharacterized protein	KIF1A_AEDAE	79.17	8e-136	Kif1a	Kinesin-like protein unc-104
1618	A0A1B0CG13	Uncharacterized protein	ZN367_DANRE	29.49	9e-07	Zn367	Zinc finger protein 367
1619	A0A1B0CG14	Uncharacterized protein	DCC1_DANRE	30.86	3e-57	Dscc1	Sister chromatid cohesion protein DCC1
1620	A0A1B0CG15	Uncharacterized protein	YO61_CAEEL	23.15	9e-06	Yo61	WW domain-containing protein ZK1098.1
1621	A0A1B0CG18	Uncharacterized protein	DERF3_DERFA	29.35	1e-15	Derf3	Mite allergen Der f 3
1622	A0A1B0CG19	Uncharacterized protein	DPM3_DICDI	33.33	4e-09	Dpm3	Dolichol-phosphate mannosyltransferase subunit 3
1623	A0A1B0CG20	Uncharacterized protein	GILT1_DROME	45.9	5e-81	Gilt1	GILT-like protein 1
1624	A0A1B0CG21	Uncharacterized protein	CCHA2_AGRIP	29.58	2e-08	Ccha2	Neuropeptide CCHamide-2
1625	A0A1B0CG22	Uncharacterized protein	WDR5_DICDI	22.39	4e-13	Wdr5	WD repeat-containing protein 5 homolog
1626	A0A1B0CG26	Uncharacterized protein	ZBT7A_CHICK	34.92	2e-06	Zbt7a	Zinc finger and BTB domain-containing protein 7A
1627	A0A1B0CG27	Uncharacterized protein	SRP54_GEOCY	59.45	1e-180	Srp54	Signal recognition particle 54 kDa protein
1628	A0A1B0CG28	Uncharacterized protein	ASPP_AEDAE	72.56	0	Aspp	Lysosomal aspartic protease
1629	A0A1B0CG29	Uncharacterized protein	ASPP_AEDAE	46.85	2e-68	Aspp	Lysosomal aspartic protease
1630	A0A1B0CG30	Uncharacterized protein	ASPP_AEDAE	41.13	5e-66	Aspp	Lysosomal aspartic protease
1631	A0A1B0CG32	Uncharacterized protein	TPC11_DANRE	38.44	6e-145	Tpc11	Trafficking protein particle complex subunit 11
1632	A0A1B0CG33	Uncharacterized protein	APC3_DICDI	42.72	2e-76	Apc3	Anaphase-promoting complex subunit 3
1633	A0A1B0CG34	Uncharacterized protein	HNRPC_XENLA	31.3	1e-09	Hnrpc	Heterogeneous nuclear ribonucleoprotein C
1634	A0A1B0CG35	Uncharacterized protein	GEI17_CAEEL	30	5e-11	Gei17	E3 SUMO-protein ligase gei-17
1635	A0A1B0CG36	Uncharacterized protein	XFIN_XENLA	33.64	7e-06	Xfin	Zinc finger protein Xfin
1636	A0A1B0CG37	Uncharacterized protein	NUDEL_DROME	27.35	4e-06	Ndl	Serine protease nudel
1637	A0A1B0CG38	Uncharacterized protein	MYOM_DICDI	26.86	3e-08	Myom	Myosin-M heavy chain
1638	A0A1B0CG39	Uncharacterized protein	NSUN2_CHICK	26.5	4e-15	Nsun2	tRNA (cytosine(34)-C(5))-methyltransferase
1639	A0A1B0CG40	Uncharacterized protein	BL1S2_DROME	65.15	5e-55	Bl1s2	Biogenesis of lysosome-related organelles complex 1 subunit 2
1640	A0A1B0CG41	Uncharacterized protein	IR3IP_XENLA	57.5	1e-30	Ir3ip	Immediate early response 3-interacting protein 1
1641	A0A1B0CG42	Uncharacterized protein	SVOP_XENLA	29.88	7e-24	Svop	Synaptic vesicle 2-related protein
1642	A0A1B0CG44	Uncharacterized protein	MUP4_CAEEL	27.09	3e-10	Mup4	Transmembrane matrix receptor MUP-4
1643	A0A1B0CG46	Uncharacterized protein	RTXE_DROME	37.68	8e-27	Rtxe	Probable RNA-directed DNA polymerase from transposon X-element
1644	A0A1B0CG47	Uncharacterized protein	GAP2_DROME	73.17	0	Gap2	Probable Ras GTPase-activating protein
1645	A0A1B0CG50	Uncharacterized protein	GAP2_DROME	35.45	2e-16	Gap2	Probable Ras GTPase-activating protein
1646	A0A1B0CG51	Uncharacterized protein	HR4_DROME	56.32	1e-15	Hr4	Hormone receptor 4
1647	A0A1B0CG55	Uncharacterized protein	JAG1B_DANRE	31.22	6e-06	Jag1b	Protein jagged-1b
1648	A0A1B0CG56	Uncharacterized protein	ZG20_XENLA	26.72	3e-06	Zg20	Gastrula zinc finger protein xFG20-1
1649	A0A1B0CG59	Uncharacterized protein	FEM1A_DROME	62.17	0	Fem1a	Protein fem-1 homolog CG6966
1650	A0A1B0CG63	Uncharacterized protein	ST1B1_CHICK	46.15	1e-10	St1b1	Sulfotransferase family cytosolic 1B member 1
1651	A0A1B0CG64	Uncharacterized protein	PAXI1_XENLA	34.81	4e-27	Paxi1	PAX-interacting protein 1
1652	A0A1B0CG65	Uncharacterized protein	DCR1A_CHICK	39.27	2e-65	Dcr1a	DNA cross-link repair 1A protein
1653	A0A1B0CG66	Uncharacterized protein	LDAH_DROME	40.59	7e-72	Ldah	Lipid droplet-associated hydrolase
1654	A0A1B0CG67	Uncharacterized protein	LTV1_DROME	45.15	2e-62	Ltv1	Protein LTV1 homolog
1655	A0A1B0CG68	Uncharacterized protein	KLFL_DROME	96.49	2e-38	Klfl	Krueppel-like factor luna
1656	A0A1B0CG69	Uncharacterized protein	LIS1_AEDAE	88.68	8e-26	Lis1	Lissencephaly-1 homolog
1657	A0A1B0CG70	Uncharacterized protein	PUF68_DROME	74.51	2e-78	Puf68	Poly(U)-binding-splicing factor half pint
1658	A0A1B0CG71	Uncharacterized protein	PK1R_DROME	55.89	2e-147	Pk1r	Pyrokinin-1 receptor
1659	A0A1B0CG72	Uncharacterized protein	LIP3_DROME	34.29	5e-52	Lip3	Lipase 3
1660	A0A1B0CG73	Uncharacterized protein	CEG1A_DROME	73.68	9e-21	Ceg1a	Centaurin-gamma-1A
1661	A0A1B0CG77	Uncharacterized protein	TTN1_CAEEL	29.82	3e-06	Ttn1	Titin homolog
1662	A0A1B0CG79	Uncharacterized protein	ACE_DROME	43.75	6e-18	Ance	Angiotensin-converting enzyme
1663	A0A1B0CG80	Uncharacterized protein	DRPR_DROME	33.07	1e-12	Drpr	Protein draper
1664	A0A1B0CG81	Uncharacterized protein	WIF1_DANRE	36.64	4e-06	Wif1	Wnt inhibitory factor 1
1665	A0A1B0CG82	Uncharacterized protein	SOS_DROME	65.9	4e-164	Sos	Protein son of sevenless
1666	A0A1B0CG84	Uncharacterized protein	MMP2_CHICK	33.58	3e-14	Mmp2	72 kDa type IV collagenase
1667	A0A1B0CG87	Uncharacterized protein	FNG_DROME	81.25	1e-13	Fng	Fringe glycosyltransferase
1668	A0A1B0CG91	Uncharacterized protein	SNX14_DANRE	21.3	1e-09	Snx14	Sorting nexin-14
1669	A0A1B0CG92	Uncharacterized protein	RD10A_XENLA	31.75	1e-28	Rd10a	Retinol dehydrogenase 10-A
1670	A0A1B0CG93	Uncharacterized protein	EFCB1_XENLA	48.99	1e-58	Efcb1	EF-hand calcium-binding domain-containing protein 1
1671	A0A1B0CGA3	Uncharacterized protein	SYMM_DROME	60.15	0	Symm	Methionine--tRNA ligase, mitochondrial
1672	A0A1B0CGA4	Uncharacterized protein	VM38_DRYCN	33.38	2e-91	Vm38	Zinc metalloproteinase-disintegrin-like MTP8
1673	A0A1B0CGA5	Uncharacterized protein	CDKL1_DANRE	49.83	3e-103	Cdkl1	Cyclin-dependent kinase-like 1
1674	A0A1B0CGA7	Uncharacterized protein	CTR2_ANOGA	34.8	7e-49	Chym2	Chymotrypsin-2
1675	A0A1B0CGA8	Uncharacterized protein	SORL_CHICK	33.84	3e-43	Sorl1	Sortilin-related receptor
1676	A0A1B0CGB1	Uncharacterized protein	RIM2_DROME	38.16	1e-26	Rim2	Mitochondrial carrier protein Rim2
1677	A0A1B0CGB2	Uncharacterized protein	GCYH_DROME	72.57	2e-111	Gcyh	Head-specific guanylate cyclase
1678	A0A1B0CGB3	Uncharacterized protein	KAPR2_DROME	61.22	6e-15	Kapr2	cAMP-dependent protein kinase type II regulatory subunit
1679	A0A1B0CGB4	Uncharacterized protein	SL172_CAEEL	40.43	2e-08	Sl172	Uncharacterized transporter slc-17.2
1680	A0A1B0CGB5	Uncharacterized protein	SL172_CAEEL	34.78	2e-08	Sl172	Uncharacterized transporter slc-17.2
1681	A0A1B0CGB6	Uncharacterized protein	VGL2A_DANRE	43.1	1e-11	Vgl2a	Vesicular glutamate transporter 2.1
1682	A0A1B0CGB7	Uncharacterized protein	EAT4_CAEEL	33.8	2e-06	Eat4	Probable vesicular glutamate transporter eat-4
1683	A0A1B0CGB8	Uncharacterized protein	VGL2B_DANRE	39.55	3e-40	Vgl2b	Vesicular glutamate transporter 2.2
1684	A0A1B0CGC1	Uncharacterized protein	DOP1_DROME	51.9	0	Dop1	Protein dopey-1 homolog
1685	A0A1B0CGC2	Uncharacterized protein	GBRB3_DROME	81.57	0	Lcch3	Gamma-aminobutyric acid receptor subunit beta-like
1686	A0A1B0CGC3	Uncharacterized protein	CADN_DROME	24.02	1e-09	Cadn	Neural-cadherin
1687	A0A1B0CGC4	Uncharacterized protein	ACH1_MANSE	81.03	1e-25	Ara1	Acetylcholine receptor subunit alpha-like
1688	A0A1B0CGC7	Uncharacterized protein	ZG20_XENLA	26.6	1e-14	Zg20	Gastrula zinc finger protein xFG20-1
1689	A0A1B0CGC8	Uncharacterized protein	ZO71_XENLA	29.25	9e-07	Zo71	Oocyte zinc finger protein XlCOF7.1
1690	A0A1B0CGC9	Uncharacterized protein	GLAS_DROVI	24.5	1e-08	Glas	Protein glass
1691	A0A1B0CGD0	Uncharacterized protein	ZG26_XENLA	29.34	2e-11	Zg26	Gastrula zinc finger protein XlCGF26.1
1692	A0A1B0CGD1	Uncharacterized protein	TBWKD_DROME	26.53	5e-09	Tbwkd	TBC1 domain family member whacked
1693	A0A1B0CGD3	Uncharacterized protein	DKF2_CAEEL	32.77	2e-11	Dkf2	Serine/threonine-protein kinase dkf-2
1694	A0A1B0CGD4	Uncharacterized protein	WWOX_DROME	32.32	2e-35	Wwox	WW domain-containing oxidoreductase
1695	A0A1B0CGD6	Uncharacterized protein	CP9E2_BLAGE	41.78	3e-47	Cp9e2	Cytochrome P450 9e2
1696	A0A1B0CGD7	Uncharacterized protein	AMPN_PLUXY	33.91	6e-13	Apn1	Aminopeptidase N
1697	A0A1B0CGD8	Uncharacterized protein	AMPN_PLUXY	28.52	8e-69	Apn1	Aminopeptidase N
1698	A0A1B0CGD9	Uncharacterized protein	AMPN_PLUXY	29.26	6e-95	Apn1	Aminopeptidase N
1699	A0A1B0CGE0	Uncharacterized protein	AMPN_PLUXY	26.89	7e-80	Apn1	Aminopeptidase N
1700	A0A1B0CGE2	Uncharacterized protein	AMPM_MANSE	22.73	5e-12	Ampm	Membrane alanyl aminopeptidase
1701	A0A1B0CGE9	Uncharacterized protein	GBB1_DROME	92.93	0	Gbb1	Guanine nucleotide-binding protein subunit beta-1
1702	A0A1B0CGF0	Uncharacterized protein	S22AG_XENLA	26.79	3e-06	S22ag	Solute carrier family 22 member 16
1703	A0A1B0CGF1	Uncharacterized protein	SVOP_XENLA	29.84	2e-24	Svop	Synaptic vesicle 2-related protein
1704	A0A1B0CGF3	Uncharacterized protein	VEGFA_BITGA	31.13	3e-09	Vegfa	Vascular endothelial growth factor A
1705	A0A1B0CGF4	Uncharacterized protein	FXL15_DANRE	25.16	2e-06	Fxl15	F-box/LRR-repeat protein 15
1706	A0A1B0CGF8	Uncharacterized protein	GUTR1_DROME	53.67	3e-114	Tre1	Protein trapped in endoderm-1
1707	A0A1B0CGF9	Uncharacterized protein	NU160_DROME	39.79	0	Nu160	Nuclear pore complex protein Nup160 homolog
1708	A0A1B0CGG0	Uncharacterized protein	UTP6_DICDI	20.97	7e-07	Utp6	U3 small nucleolar RNA-associated protein 6 homolog
1709	A0A1B0CGG1	Uncharacterized protein	ZN12_MICSA	27.92	1e-13	Zn12	Zinc finger protein ZFMSA12A
1710	A0A1B0CGG2	Uncharacterized protein	APC1_DICDI	23.28	8e-06	Apc1	Anaphase-promoting complex subunit 1
1711	A0A1B0CGG4	Uncharacterized protein	ACH2_DROME	36.36	7e-16	Ach2	Acetylcholine receptor subunit alpha-like 2
1712	A0A1B0CGG5	Uncharacterized protein	ATLAS_DROME	76.49	5e-140	Atl	Atlastin
1713	A0A1B0CGG6	Uncharacterized protein	HXC3A_DANRE	36.84	4e-09	Hxc3a	Homeobox protein Hox-C3a
1714	A0A1B0CGG7	Uncharacterized protein	CLSPN_DROME	40.07	7e-38	Clspn	Claspin
1715	A0A1B0CGG9	Uncharacterized protein	MAX_DROME	52.63	6e-47	Max	Protein max
1716	A0A1B0CGH0	Uncharacterized protein	ATLAS_DROME	70.19	0	Atl	Atlastin
1717	A0A1B0CGH1	Uncharacterized protein	E78C_DROME	91.76	2e-50	E78c	Ecdysone-induced protein 78C
1718	A0A1B0CGH3	Uncharacterized protein	DHX15_CAEEL	75.07	0	Dhx15	Pre-mRNA-splicing factor ATP-dependent RNA helicase ddx-15
1719	A0A1B0CGH4	Uncharacterized protein	DDX56_DICDI	46.11	2e-36	Ddx56	Probable ATP-dependent RNA helicase ddx56
1720	A0A1B0CGH6	Uncharacterized protein	BODG_CAEEL	24.94	5e-44	Bodg	Probable gamma-butyrobetaine dioxygenase
1721	A0A1B0CGH7	Uncharacterized protein	OB10_DROME	53.4	4e-36	A10	Putative odorant-binding protein A10
1722	A0A1B0CGI1	Uncharacterized protein	SP9_XENTR	32.43	3e-25	Sp9	Transcription factor Sp9
1723	A0A1B0CGM0	Uncharacterized protein	CLVS1_XENLA	30.51	4e-31	Clvs1	Clavesin-1
1724	A0A1B0CGM2	Uncharacterized protein	IF4E_DROME	49.78	8e-74	If4e	Eukaryotic translation initiation factor 4E1
1725	A0A1B0CGM3	Uncharacterized protein	TOPI_DROME	24.38	3e-08	Topi	Testis-specific zinc finger protein topi
1726	A0A1B0CGM5	Uncharacterized protein	NAA80_DROME	50.3	2e-43	Naa80	N-alpha-acetyltransferase 80
1727	A0A1B0CGM6	Uncharacterized protein	NUP58_DROME	41.01	1e-70	Nup58	Probable nucleoporin Nup58
1728	A0A1B0CGM7	Uncharacterized protein	SORCN_SCHJA	50.91	2e-51	Sorcn	Sorcin
1729	A0A1B0CGM8	Uncharacterized protein	SECG_DICDI	26.76	8e-16	Secg	Ankyrin repeat, PH and SEC7 domain containing protein secG
1730	A0A1B0CGN0	Uncharacterized protein	ZPR1_CAEEL	43.07	3e-122	Zpr1	Zinc finger protein ZPR1 homolog
1731	A0A1B0CGN1	Uncharacterized protein	DNAL1_XENTR	65.83	1e-47	Dnal1	Dynein light chain 1, axonemal
1732	A0A1B0CGN2	Uncharacterized protein	DNAL1_DANRE	45.83	1e-30	Dnal1	Dynein light chain 1, axonemal
1733	A0A1B0CGN3	Uncharacterized protein	UGT3_PLEPL	28.16	1e-53	Ugt3	UDP-glucuronosyltransferase
1734	A0A1B0CGN7	Uncharacterized protein	UNC79_CAEEL	37.97	1e-30	Unc79	Uncoordinated protein 79
1735	A0A1B0CGP3	Uncharacterized protein	SYQ_DROME	71.47	0	Syq	Probable glutamine--tRNA ligase
1736	A0A1B0CGP5	Uncharacterized protein	STUB_DROME	46.61	2e-69	Stub	Serine proteinase stubble
1737	A0A1B0CGP6	Uncharacterized protein	TRM2B_DANRE	37.4	2e-70	Trm2b	tRNA (uracil(54)-C(5))-methyltransferase homolog-B
1738	A0A1B0CGP7	Uncharacterized protein	OPA1_DANRE	51.26	0	Opa1	Dynamin-like 120 kDa protein, mitochondrial
1739	A0A1B0CGP8	Uncharacterized protein	ATK_DROME	25.19	3e-16	Atk	Protein artichoke
1740	A0A1B0CGQ2	Uncharacterized protein	ALKB8_XENTR	43.75	7e-07	Alkb8	Alkylated DNA repair protein alkB homolog 8
1741	A0A1B0CGQ3	Uncharacterized protein	41_DROME	76.68	0	Cora	Protein 4.1 homolog
1742	A0A1B0CGQ5	Uncharacterized protein	EFR3_DROME	63.37	0	Stma	Protein EFR3 homolog cmp44E
1743	A0A1B0CGQ8	Uncharacterized protein	NAA80_DROME	50	9e-39	Naa80	N-alpha-acetyltransferase 80
1744	A0A1B0CGR0	Uncharacterized protein	TOPI_DROME	28.77	3e-13	Topi	Testis-specific zinc finger protein topi
1745	A0A1B0CGR1	Uncharacterized protein	RS29_DROME	92.86	4e-34	Rps29	40S ribosomal protein S29
1746	A0A1B0CGR2	Uncharacterized protein	RDGB_DROME	20.1	4e-12	Rdgb	Protein retinal degeneration B
1747	A0A1B0CGR3	Uncharacterized protein	WDR75_XENLA	31.62	2e-50	Wdr75	WD repeat-containing protein 75
1748	A0A1B0CGR5	Uncharacterized protein	WDR75_XENLA	27.85	7e-11	Wdr75	WD repeat-containing protein 75
1749	A0A1B0CGS0	Uncharacterized protein	C28A5_DROME	39.55	4e-93	C28a5	Probable cytochrome P450 28a5
1750	A0A1B0CGS3	Uncharacterized protein	CTR2_XENLA	22.62	9e-08	Ctr2	Cationic amino acid transporter 2
1751	A0A1B0CGS7	Uncharacterized protein	SICK_DROME	74.47	1e-15	Sick	Protein sickie
1752	A0A1B0CGS9	Uncharacterized protein	FAHD1_DICDI	43.28	3e-54	Fahd1	Acylpyruvase FAHD1, mitochondrial
1753	A0A1B0CGT0	Uncharacterized protein	MRJP5_APIME	46.94	0.0008	Mrjp5	Major royal jelly protein 5
1754	A0A1B0CGT3	Uncharacterized protein	IR25A_DROME	44.72	1e-121	Ir25a	Ionotropic receptor 25a
1755	A0A1B0CGT5	Uncharacterized protein	ABCGK_DICDI	28.63	2e-85	Abcgk	ABC transporter G family member 20
1756	A0A1B0CGT7	Uncharacterized protein	GALT1_DROME	62.36	1e-124	Galt1	Polypeptide N-acetylgalactosaminyltransferase 1
1757	A0A1B0CGT8	Uncharacterized protein	DCTN6_XENTR	49.42	2e-54	Dctn6	Dynactin subunit 6
1758	A0A1B0CGT9	Uncharacterized protein	EF1D_XENLA	45.83	5e-64	Eef1d	Elongation factor 1-delta
1759	A0A1B0CGU1	Uncharacterized protein	CY561_CAEEL	37.24	5e-56	Cy561	Putative cytochrome b561
1760	A0A1B0CGU2	Uncharacterized protein	FOI_DROME	49.52	3e-144	Foi	Zinc transporter foi
1761	A0A1B0CGU3	Uncharacterized protein	UBE2C_DROME	72.32	4e-91	Vih	Ubiquitin-conjugating enzyme E2 C
1762	A0A1B0CGU4	Uncharacterized protein	GGYF1_DROME	32.77	2e-59	Ggyf1	GIGYF family protein CG11148
1763	A0A1B0CGU5	Uncharacterized protein	AXP83_CIOIN	25.52	1e-22	Axp83	Axonemal 84 kDa protein
1764	A0A1B0CGU6	Uncharacterized protein	WASC4_DICDI	38.1	4e-124	Wasc4	WASH complex subunit 4
1765	A0A1B0CGU9	Uncharacterized protein	PGSB1_DROME	31.71	6e-21	Pgsb1	Peptidoglycan-recognition protein SB1
1766	A0A1B0CGV1	Uncharacterized protein	DYHC_DROME	82.39	0	Dyhc	Dynein heavy chain, cytoplasmic
1767	A0A1B0CGV2	Uncharacterized protein	S11IP_XENTR	30.99	2e-11	S11ip	Serine/threonine-protein kinase 11-interacting protein
1768	A0A1B0CGV4	Uncharacterized protein	GRIP2_XENLA	24.73	3e-06	Grip2	Glutamate receptor-interacting protein 2
1769	A0A1B0CGV5	Uncharacterized protein	TMC7_CHICK	28.79	5e-93	Tmc7	Transmembrane channel-like protein 7
1770	A0A1B0CGV6	Uncharacterized protein	STNB_DROME	59.44	0	Stnb	Protein stoned-B
1771	A0A1B0CGV7	Uncharacterized protein	CRFR1_XENLA	27.36	6e-30	Crhr1	Corticotropin-releasing factor receptor 1
1772	A0A1B0CGV8	Uncharacterized protein	GLOD4_CAEBR	48.56	5e-90	Glod4	Glyoxalase 1
1773	A0A1B0CGW0	Uncharacterized protein	MCFG_DICDI	29.32	3e-37	Mcfg	Mitochondrial substrate carrier family protein G
1774	A0A1B0CGW1	Uncharacterized protein	KRH1_DROME	29.21	2e-15	Krh1	Krueppel homolog 1
1775	A0A1B0CGW4	Uncharacterized protein	LIN10_CAEEL	79.1	3e-25	Lin10	Protein lin-10
1776	A0A1B0CGW5	Uncharacterized protein	CDK9_CHICK	61.17	2e-34	Cdk9	Cyclin-dependent kinase 9
1777	A0A1B0CGW6	Uncharacterized protein	CHAO_DROME	26.2	9e-17	Chp	Chaoptin
1778	A0A1B0CGW8	Uncharacterized protein	EBP2_DROME	56.36	6e-95	Ebp2	Probable rRNA-processing protein EBP2 homolog
1779	A0A1B0CGW9	Uncharacterized protein	CHAO_DROME	22.92	1e-07	Chp	Chaoptin
1780	A0A1B0CGX0	Uncharacterized protein	PHYD1_DANRE	45.23	5e-84	Phyd1	Phytanoyl-CoA dioxygenase domain-containing protein 1
1781	A0A1B0CGX1	Uncharacterized protein	SQZ_DROPS	25.51	2e-07	Sqz	Zinc finger protein squeeze
1782	A0A1B0CGX4	Uncharacterized protein	NXF2_DROME	21.32	5e-14	Nxf2	Nuclear RNA export factor 2
1783	A0A1B0CGX8	Uncharacterized protein	DOA_DROME	80.93	0	Doa	Serine/threonine-protein kinase Doa
1784	A0A1B0CGY0	Uncharacterized protein	VINC_DROME	75.83	0	Vinc	Vinculin
1785	A0A1B0CGY1	Uncharacterized protein	NCD_DROME	73.39	3e-50	Ncd	Protein claret segregational
1786	A0A1B0CGY2	Uncharacterized protein	RTCB_ANOGA	76.68	0	Rtcb	tRNA-splicing ligase RtcB homolog
1787	A0A1B0CGY4	Uncharacterized protein	NDUS7_CAEEL	52.5	8e-61	Ndus7	Probable NADH dehydrogenase [ubiquinone] iron-sulfur protein 7, mitochondrial
1788	A0A1B0CGY9	Uncharacterized protein	Y8611_DROME	52.41	3e-60	Y8611	Probable ATP-dependent RNA helicase CG8611
1789	A0A1B0CGZ0	Uncharacterized protein	C2CD5_XENTR	37.44	6e-33	C2cd5	C2 domain-containing protein 5
1790	A0A1B0CGZ1	Uncharacterized protein	NEMS_DROME	52.13	1e-25	Nems	Dromyosuppressin
1791	A0A1B0CGZ2	Uncharacterized protein	ACSB_DICDI	42.01	3e-168	Aslb	Acyl-CoA synthetase short-chain family member B, mitochondrial
1792	A0A1B0CGZ3	Uncharacterized protein	RRP44_CAEEL	43.06	2e-145	Rrp44	Probable exosome complex exonuclease RRP44
1793	A0A1B0CGZ4	Uncharacterized protein	FCHO1_DANRE	43.89	4e-71	Fcho1	F-BAR domain only protein 1
1794	A0A1B0CGZ5	Uncharacterized protein	CNBP_CHICK	34.15	9e-06	Cnbp	Cellular nucleic acid-binding protein
1795	A0A1B0CGZ7	Uncharacterized protein	SWM_DROME	45.55	2e-163	Swm	Zinc finger protein swm
1796	A0A1B0CGZ8	Uncharacterized protein	GCN1_DICDI	36.3	0	Gcn1	eIF-2-alpha kinase activator GCN1
1797	A0A1B0CGZ9	Uncharacterized protein	FAH2A_DANRE	48.65	1e-15	Fah2a	Fatty-acid amide hydrolase 2-A
1798	A0A1B0CH02	Uncharacterized protein	S247B_DANRE	27.64	3e-16	S247b	Solute carrier family 25 member 47-B
1799	A0A1B0CH03	Uncharacterized protein	MED27_ANOGA	63.95	3e-139	Med27	Mediator of RNA polymerase II transcription subunit 27
1800	A0A1B0CH04	Uncharacterized protein	CLVS1_XENLA	28.57	9e-26	Clvs1	Clavesin-1
1801	A0A1B0CH07	Uncharacterized protein	FAS1_SCHAM	24.02	7e-08	Fas1	Fasciclin-1
1802	A0A1B0CH08	Uncharacterized protein	KCAB1_CHICK	25.48	3e-11	Kcab1	Voltage-gated potassium channel subunit beta-1
1803	A0A1B0CH11	Uncharacterized protein	PRKAG_DICDI	56.92	2e-18	Prkag	5'-AMP-activated protein kinase subunit gamma
1804	A0A1B0CH13	Uncharacterized protein	S35B1_DROME	64.36	4e-72	Meigo	Solute carrier family 35 member B1 homolog
1805	A0A1B0CH15	Uncharacterized protein	CADM3_XENLA	26.09	6e-07	Cadm3	Cell adhesion molecule 3
1806	A0A1B0CH19	Uncharacterized protein	FP_ACRMI	26.23	2e-08	Fp	Fibronectin type III domain-containing protein
1807	A0A1B0CH20	Uncharacterized protein	CDK4_XENLA	48.51	6e-36	Cdk4	Cyclin-dependent kinase 4
1808	A0A1B0CH21	Uncharacterized protein	AP3S_DICDI	63.69	7e-71	Ap3s1	AP-3 complex subunit sigma
1809	A0A1B0CH22	Uncharacterized protein	MYSN_DROME	73.5	8e-51	Zip	Myosin heavy chain, non-muscle
1810	A0A1B0CH23	Uncharacterized protein	TWK18_CAEEL	28.8	9e-25	Twk18	TWiK family of potassium channels protein 18
1811	A0A1B0CH28	Uncharacterized protein	CP6G1_DROME	35.42	5e-25	Cp6g1	Cytochrome P450 6g1
1812	A0A1B0CH29	Uncharacterized protein	MFD6B_DANRE	35.19	8e-35	Mfd6b	Major facilitator superfamily domain-containing protein 6-B
1813	A0A1B0CH30	Uncharacterized protein	GLMP_SALSA	31.19	2e-33	Glmp	Glycosylated lysosomal membrane protein
1814	A0A1B0CH31	Uncharacterized protein	TRYP_ASTAS	29.54	2e-27	Tryp	Trypsin-1
1815	A0A1B0CH32	Uncharacterized protein	TRYP_ASTAS	33.47	2e-41	Tryp	Trypsin-1
1816	A0A1B0CH33	Uncharacterized protein	ZIG8_CAEEL	27.12	5e-13	Zig8	Zwei Ig domain protein zig-8
1817	A0A1B0CH35	Uncharacterized protein	H15_DROME	73.68	1e-09	H15	T-box protein H15
1818	A0A1B0CH36	Uncharacterized protein	H15_DROME	85.11	1e-51	H15	T-box protein H15
1819	A0A1B0CH37	Uncharacterized protein	CP305_DROME	35.94	1e-69	Cp305	Probable cytochrome P450 305a1
1820	A0A1B0CH38	Uncharacterized protein	TGDS_DICDI	27.22	3e-06	Tgds	dTDP-D-glucose 4,6-dehydratase
1821	A0A1B0CH39	Uncharacterized protein	GADL1_XENTR	52.76	5e-68	Gadl1	Acidic amino acid decarboxylase GADL1
1822	A0A1B0CH40	Uncharacterized protein	RPA1_DROME	62.5	3e-167	Rpi1	DNA-directed RNA polymerase I subunit RPA1
1823	A0A1B0CH42	Uncharacterized protein	SPNE_CULQU	34.4	3e-12	Spne	Probable ATP-dependent RNA helicase spindle-E
1824	A0A1B0CH44	Uncharacterized protein	MET15_DROME	56.19	5e-132	Met15	Probable methyltransferase-like protein 15 homolog
1825	A0A1B0CH45	Uncharacterized protein	ODO2_TAKRU	81.42	3e-62	Dlst	Dihydrolipoyllysine-residue succinyltransferase component of 2-oxoglutarate dehydrogenase complex, mitochondrial
1826	A0A1B0CH46	Uncharacterized protein	SMAP2_CHICK	45.97	1e-47	Smap2	Stromal membrane-associated protein 2
1827	A0A1B0CH47	Uncharacterized protein	CAC1D_DROME	56	5e-19	Cac1d	Voltage-dependent calcium channel type D subunit alpha-1
1828	A0A1B0CH48	Uncharacterized protein	SAP30_AEDAE	87.72	1e-111	Sap30	Histone deacetylase complex subunit SAP30 homolog
1829	A0A1B0CH49	Uncharacterized protein	EXOS7_DICDI	24.3	1e-14	Exos7	Putative exosome complex exonuclease RRP42
1830	A0A1B0CH50	Uncharacterized protein	TNNT_DROME	80.07	3e-152	Tnnt	Troponin T, skeletal muscle
1831	A0A1B0CH51	Uncharacterized protein	EVI1B_XENLA	34.21	2e-08	Evi1b	MDS1 and EVI1 complex locus protein EVI1-B
1832	A0A1B0CH52	Uncharacterized protein	SCRT_DROME	42.86	1e-32	Scrt	Protein scarlet
1833	A0A1B0CH53	Uncharacterized protein	LAMA_DROME	20.6	2e-10	Lana	Laminin subunit alpha
1834	A0A1B0CH54	Uncharacterized protein	DAB_DROME	55.58	4e-131	Dab	Protein disabled
1835	A0A1B0CH56	Uncharacterized protein	LASP1_DROME	88.33	2e-71	Lasp1	LIM and SH3 domain protein Lasp
1836	A0A1B0CH58	Uncharacterized protein	LASP1_DROME	73.91	2e-30	Lasp1	LIM and SH3 domain protein Lasp
1837	A0A1B0CH59	Uncharacterized protein	ROMO1_DANRE	65	1e-30	Romo1	Reactive oxygen species modulator 1
1838	A0A1B0CH60	Uncharacterized protein	GALL1_DROME	71.34	6e-79	Gall1	MIP18 family protein galla-1
1839	A0A1B0CH61	Uncharacterized protein	EXU_DROVI	41.91	9e-110	Exu	Maternal protein exuperantia
1840	A0A1B0CH62	Uncharacterized protein	DMAP1_DROME	72.75	0	Dmap1	DNA methyltransferase 1-associated protein 1
1841	A0A1B0CH64	Uncharacterized protein	EMAL_DROME	56.89	5e-52	Emal	Echinoderm microtubule-associated protein-like CG42247
1842	A0A1B0CH65	Uncharacterized protein	EMAL_DROME	78.11	0	Emal	Echinoderm microtubule-associated protein-like CG42247
1843	A0A1B0CH66	Uncharacterized protein	XDH_DICDI	30.2	2e-169	Xdh	Xanthine dehydrogenase
1844	A0A1B0CH68	Uncharacterized protein	SCPL1_DICDI	29.01	8e-14	Scpl1	Serine carboxypeptidase S10 family member 1
1845	A0A1B0CH70	Uncharacterized protein	DYHC_TRIGR	29.93	1e-65	Dyhc	Dynein beta chain, ciliary
1846	A0A1B0CH71	Uncharacterized protein	DYHC_TRIGR	30.28	0	Dyhc	Dynein beta chain, ciliary
1847	A0A1B0CH72	Uncharacterized protein	DCP2_CAEEL	44.12	3e-50	Dcp2	mRNA-decapping enzyme 2
1848	A0A1B0CH73	Uncharacterized protein	TBK1_XENLA	36.2	1e-136	Tbk1	Serine/threonine-protein kinase TBK1
1849	A0A1B0CH76	Uncharacterized protein	EDC4_DROME	34.93	4e-46	Edc4	Enhancer of mRNA-decapping protein 4 homolog
1850	A0A1B0CH78	Uncharacterized protein	NDC1_DROPS	31.54	1e-82	Ndc1	Nucleoporin Ndc1
1851	A0A1B0CH79	Uncharacterized protein	MCM10_DROME	45.87	0	Mcm10	Protein MCM10 homolog
1852	A0A1B0CH82	Uncharacterized protein	RPTOR_DICDI	42.61	2e-39	Rptor	Protein raptor homolog
1853	A0A1B0CH83	Uncharacterized protein	RPTOR_DICDI	25.06	3e-33	Rptor	Protein raptor homolog
1854	A0A1B0CH84	Uncharacterized protein	MOB3_DROME	83.26	5e-138	Mob3	MOB kinase activator-like 3
1855	A0A1B0CH89	Uncharacterized protein	DUOX_DROME	29.6	8e-11	Duox	Dual oxidase
1856	A0A1B0CH90	Uncharacterized protein	EPS15_DICDI	27.51	1e-09	Eps15	Epidermal growth factor receptor substrate 15 homolog
1857	A0A1B0CH92	Uncharacterized protein	ST7_DROPS	80.78	0	St7	Protein ST7 homolog
1858	A0A1B0CH93	Uncharacterized protein	DDX54_DICDI	43.21	2e-140	Hela	ATP-dependent RNA helicase ddx54
1859	A0A1B0CH95	Uncharacterized protein	SAP_CHICK	46.34	0.0003	Psap	Prosaposin
1860	A0A1B0CH96	Uncharacterized protein	ZN12_MICSA	53.85	0.0007	Zn12	Zinc finger protein ZFMSA12A
1861	A0A1B0CH97	Uncharacterized protein	LOLA3_DROME	55	5e-06	Lola3	Longitudinals lacking protein, isoforms A/B/D/L
1862	A0A1B0CH98	Uncharacterized protein	NGAP_DICDI	33.89	1e-19	Ngap	Probable Ras GTPase-activating-like protein ngap
1863	A0A1B0CHA0	Uncharacterized protein	DNA2_XENLA	31.84	2e-135	Dna2	DNA replication ATP-dependent helicase/nuclease DNA2
1864	A0A1B0CHA4	Uncharacterized protein	DHGL_DROME	28.06	2e-50	Gld	Glucose dehydrogenase [FAD, quinone]
1865	A0A1B0CHA5	Uncharacterized protein	RTXE_DROME	27.7	2e-68	Rtxe	Probable RNA-directed DNA polymerase from transposon X-element
1866	A0A1B0CHA6	Uncharacterized protein	DHGL_DROPS	58.62	2e-14	Gld	Glucose dehydrogenase [FAD, quinone]
1867	A0A1B0CHA7	Uncharacterized protein	DHGL_DROME	45.44	5e-166	Gld	Glucose dehydrogenase [FAD, quinone]
1868	A0A1B0CHA8	Uncharacterized protein	DHGL_DROPS	43.56	4e-142	Gld	Glucose dehydrogenase [FAD, quinone]
1869	A0A1B0CHA9	Uncharacterized protein	SAX3_CAEEL	29.47	3e-07	Sax3	Protein sax-3
1870	A0A1B0CHB0	Uncharacterized protein	NMDA1_DROMO	81.24	0	Nmda1	Glutamate [NMDA] receptor subunit 1
1871	A0A1B0CHB3	Uncharacterized protein	VASN_XENTR	29.91	2e-06	Vasn	Vasorin
1872	A0A1B0CHB5	Uncharacterized protein	ATC1_ANOGA	85.83	0	Atc1	Calcium-transporting ATPase sarcoplasmic/endoplasmic reticulum type
1873	A0A1B0CHB6	Uncharacterized protein	NUCG_CAEEL	49.32	3e-100	Nucg	Endonuclease G, mitochondrial
1874	A0A1B0CHB8	Uncharacterized protein	CYFIP_DROME	83.85	1e-172	Cyfip	Cytoplasmic FMR1-interacting protein
1875	A0A1B0CHC0	Uncharacterized protein	LMBD2_DROPS	53.64	4e-116	Lmbd2	LMBR1 domain-containing protein 2 homolog
1876	A0A1B0CHC3	Uncharacterized protein	MCFJ_DICDI	26.1	1e-28	Mcfj	Mitochondrial substrate carrier family protein J
1877	A0A1B0CHC4	Uncharacterized protein	ACOC_CHICK	69.68	0	Aco1	Cytoplasmic aconitate hydratase
1878	A0A1B0CHC5	Uncharacterized protein	EGL10_CAEEL	38.65	3e-41	Egl10	Regulator of G-protein signaling egl-10
1879	A0A1B0CHC6	Uncharacterized protein	SOX15_DROME	62.65	2e-23	Sox15	Putative transcription factor SOX-15
1880	A0A1B0CHC8	Uncharacterized protein	NOTC1_XENLA	23.77	7e-06	Notc1	Neurogenic locus notch homolog protein 1
1881	A0A1B0CHC9	Uncharacterized protein	TRET1_BOMMO	37.86	8e-22	Tret1	Facilitated trehalose transporter Tret1
1882	A0A1B0CHD0	Uncharacterized protein	MBOA5_DROME	43.26	4e-90	Mboa5	Lysophospholipid acyltransferase 5
1883	A0A1B0CHD1	Uncharacterized protein	PSDE_DROME	95.8	4e-75	Rpn11	26S proteasome non-ATPase regulatory subunit 14
1884	A0A1B0CHD4	Uncharacterized protein	HID_DROME	31.82	4e-11	Hid	Cell death protein hid
1885	A0A1B0CHD7	Uncharacterized protein	NOTC1_XENTR	24.2	2e-07	Notc1	Neurogenic locus notch homolog protein 1
1886	A0A1B0CHD8	Uncharacterized protein	EVI1B_XENLA	34.21	2e-08	Evi1b	MDS1 and EVI1 complex locus protein EVI1-B
1887	A0A1B0CHE1	Uncharacterized protein	EOGT_DROME	44.44	1e-27	Eogt	EGF domain-specific O-linked N-acetylglucosamine transferase
1888	A0A1B0CHE3	Uncharacterized protein	NPY1R_XENLA	34.74	5e-10	Npy1r	Neuropeptide Y receptor type 1
1889	A0A1B0CHF0	Uncharacterized protein	PDCD4_CHICK	44.72	1e-89	Pdcd4	Programmed cell death protein 4
1890	A0A1B0CHF3	Uncharacterized protein	ZN574_XENTR	28.92	4e-06	Zn574	Zinc finger protein 574
1891	A0A1B0CHF4	Uncharacterized protein	OUIB_DROME	24.92	1e-06	Ouib	Transcription factor Ouib
1892	A0A1B0CHF5	Uncharacterized protein	RCC2_DANRE	49.04	6e-138	Rcc2	Protein RCC2 homolog
1893	A0A1B0CHF8	Uncharacterized protein	UPPS_GIAIC	28.91	4e-12	Upps	Di-trans,poly-cis-undecaprenyl-diphosphate synthase
1894	A0A1B0CHG0	Uncharacterized protein	ABCD2_DICDI	37.83	6e-138	Abcd2	ABC transporter D family member 2
1895	A0A1B0CHG1	Uncharacterized protein	NPHP3_XENTR	27.88	8e-07	Nphp3	Nephrocystin-3
1896	A0A1B0CHG3	Uncharacterized protein	ZNRF2_DANRE	66.67	4e-45	Znrf2	E3 ubiquitin-protein ligase znrf2
1897	A0A1B0CHG4	Uncharacterized protein	RM03_CAEEL	35.59	1e-48	Rm03	Putative 39S ribosomal protein L3, mitochondrial
1898	A0A1B0CHH3	Uncharacterized protein	LOLA5_DROME	53.19	4e-28	Lola5	Longitudinals lacking protein, isoforms J/P/Q/S/Z
1899	A0A1B0CHH5	Uncharacterized protein	PKS1_DICDI	28.73	9e-21	Stla	Probable polyketide synthase 1
1900	A0A1B0CHI0	Uncharacterized protein	RNPS1_DANRE	47.22	8e-15	Rnps1	RNA-binding protein with serine-rich domain 1
1901	A0A1B0CHI2	Uncharacterized protein	ILKH_CAEEL	61.74	0	Ilkh	Integrin-linked protein kinase homolog pat-4
1902	A0A1B0CHI4	Uncharacterized protein	GSTT1_DROMA	35.48	4e-10	Gstd1	Glutathione S-transferase 1-1
1903	A0A1B0CHI7	Uncharacterized protein	KIT_XENLA	33.89	4e-22	Kit	Mast/stem cell growth factor receptor-related protein Kit
1904	A0A1B0CHJ1	Uncharacterized protein	WDR5_XENTR	29.82	4e-09	Wdr5	WD repeat-containing protein 5
1905	A0A1B0CHJ2	Uncharacterized protein	CALUB_DANRE	49.06	4e-09	Calub	Calumenin-B
1906	A0A1B0CHJ6	Uncharacterized protein	VIR_DROPS	32.9	7e-152	Vir	Protein virilizer
1907	A0A1B0CHJ9	Uncharacterized protein	RL7_CHICK	35.08	3e-38	Rpl7	60S ribosomal protein L7
1908	A0A1B0CHK0	Uncharacterized protein	IRX_CAEEL	46.27	1e-10	Irx	Putative iroquois-class homeodomain protein irx-1
1909	A0A1B0CHK1	Uncharacterized protein	RM10_DROPS	49.56	5e-73	Rm10	39S ribosomal protein L10, mitochondrial
1910	A0A1B0CHK2	Uncharacterized protein	PP1RA_XENLA	41.04	2e-19	Pp1ra	Serine/threonine-protein phosphatase 1 regulatory subunit 10
1911	A0A1B0CHK5	Uncharacterized protein	LA_AEDAL	47.32	5e-93	La	La protein homolog
1912	A0A1B0CHK7	Uncharacterized protein	CLVS1_XENLA	26.62	9e-29	Clvs1	Clavesin-1
1913	A0A1B0CHK8	Uncharacterized protein	NECAP_DROME	76.49	9e-132	Necap	NECAP-like protein CG9132
1914	A0A1B0CHK9	Uncharacterized protein	RL7A_DROME	76.38	6e-130	Rpl7a	60S ribosomal protein L7a
1915	A0A1B0CHL0	Uncharacterized protein	ABR_XENTR	35.79	8e-137	Abr	Active breakpoint cluster region-related protein
1916	A0A1B0CHL1	Uncharacterized protein	NLE_DROME	73.95	0	Nle	Protein Notchless
1917	A0A1B0CHL2	Uncharacterized protein	BAP60_DROME	74.91	0	Bap60	Brahma-associated protein of 60 kDa
1918	A0A1B0CHL4	Uncharacterized protein	KINH_DROME	93.42	2e-85	Khc	Kinesin heavy chain
1919	A0A1B0CHL6	Uncharacterized protein	NEDD4_DROME	50.74	1e-115	Nedd4	E3 ubiquitin-protein ligase Nedd-4
1920	A0A1B0CHL7	Uncharacterized protein	RYBPB_DANRE	68.75	5e-14	Rybpb	RING1 and YY1-binding protein B
1921	A0A1B0CHL9	Uncharacterized protein	ZASP_DROME	63.46	3e-10	Zasp	PDZ and LIM domain protein Zasp
1922	A0A1B0CHM0	Uncharacterized protein	ZASP_DROME	69.19	4e-78	Zasp	PDZ and LIM domain protein Zasp
1923	A0A1B0CHM2	Uncharacterized protein	SIAT2_TAKRU	44.88	5e-20	Siat2	Beta-galactoside alpha-2,6-sialyltransferase 2
1924	A0A1B0CHM3	Uncharacterized protein	MMP11_XENLA	41.36	7e-82	Mmp11	Stromelysin-3
1925	A0A1B0CHM4	Uncharacterized protein	PATJ_DROME	55.37	0	Patj	Patj homolog
1926	A0A1B0CHM6	Uncharacterized protein	E631_DROME	68	9e-43	E631	Calcium-binding protein E63-1
1927	A0A1B0CHM8	Uncharacterized protein	HD_TAKRU	31.53	9e-24	Htt	Huntingtin
1928	A0A1B0CHM9	Uncharacterized protein	MOEH_DROME	80.12	5e-167	Moe	Moesin/ezrin/radixin homolog 1
1929	A0A1B0CHN0	Uncharacterized protein	SUP9_CAEEL	31.8	3e-31	Sup9	Two pore potassium channel protein sup-9
1930	A0A1B0CHN2	Uncharacterized protein	UBP30_DROME	60.39	0	Ubp30	Ubiquitin carboxyl-terminal hydrolase 30 homolog
1931	A0A1B0CHN3	Uncharacterized protein	S35E1_DROME	65.87	2e-155	S35e1	Solute carrier family 35 member E1 homolog
1932	A0A1B0CHN4	Uncharacterized protein	MON1A_CHICK	44.12	4e-135	Mon1a	Vacuolar fusion protein MON1 homolog A
1933	A0A1B0CHN5	Uncharacterized protein	CFA20_DROME	94.39	1e-136	Cfa20	Cilia- and flagella-associated protein 20
1934	A0A1B0CHN7	Uncharacterized protein	IR75A_DROSE	26.27	9e-11	Ir75a	Ionotropic receptor 75a
1935	A0A1B0CHP0	Uncharacterized protein	FRMD3_XENTR	37.61	2e-83	Frmd3	FERM domain-containing protein 3
1936	A0A1B0CHP3	Uncharacterized protein	DSCL_DROME	24.46	2e-12	Dscl	Down syndrome cell adhesion molecule-like protein Dscam2
1937	A0A1B0CHP5	Uncharacterized protein	SARM1_DROME	64.52	0	Ect4	Sterile alpha and TIR motif-containing protein 1
1938	A0A1B0CHP6	Uncharacterized protein	OBP67_ANOGA	26.32	1e-14	Obp67	General odorant-binding protein 67
1939	A0A1B0CHP8	Uncharacterized protein	CP301_DROME	71.43	0	Cp301	Probable cytochrome P450 301a1, mitochondrial
1940	A0A1B0CHP9	Uncharacterized protein	SHOC2_DANRE	42.86	2e-06	Shoc2	Leucine-rich repeat protein SHOC-2
1941	A0A1B0CHQ0	Uncharacterized protein	SNAG_DICDI	35.96	1e-08	Snpc	Gamma-soluble NSF attachment protein
1942	A0A1B0CHQ1	Uncharacterized protein	CRVP_LATSE	30.22	2e-08	Crvp	Cysteine-rich venom protein latisemin
1943	A0A1B0CHQ2	Uncharacterized protein	KCNT1_CHICK	47.91	3e-138	Kcnt1	Potassium channel subfamily T member 1
1944	A0A1B0CHQ8	Uncharacterized protein	PRKDC_CHICK	24.37	0	Prkdc	DNA-dependent protein kinase catalytic subunit
1945	A0A1B0CHR2	Uncharacterized protein	P3A2_STRPU	30.99	1e-11	P3a2	DNA-binding protein P3A2
1946	A0A1B0CHR3	Uncharacterized protein	INT6_DROME	70.37	0.0002	Int6	Integrator complex subunit 6
1947	A0A1B0CHR5	Uncharacterized protein	MTNA_DROWI	80.52	6e-135	Mtna	Methylthioribose-1-phosphate isomerase
1948	A0A1B0CHR6	Uncharacterized protein	PTER_DROYA	70.97	7e-07	Pter	Phosphotriesterase-related protein
1949	A0A1B0CHR7	Uncharacterized protein	ZC3HF_DROME	53.85	8e-50	Zc3hf	Zinc finger CCCH domain-containing protein 15 homolog
1950	A0A1B0CHR9	Uncharacterized protein	TDRD1_DANRE	23.77	8e-08	Tdrd1	Tudor domain-containing protein 1
1951	A0A1B0CHS1	Uncharacterized protein	TUD_DROME	35.42	4e-12	Tud	Maternal protein tudor
1952	A0A1B0CHS2	Uncharacterized protein	TUD_DROME	25.32	2e-08	Tud	Maternal protein tudor
1953	A0A1B0CHS5	Uncharacterized protein	ADA2_DANRE	38.55	1e-90	Ada2	Adenosine deaminase 2-A
1954	A0A1B0CHS9	Uncharacterized protein	FTF1B_DROME	75	2e-06	Hr39	Nuclear hormone receptor FTZ-F1 beta
1955	A0A1B0CHT0	Uncharacterized protein	OSP_DROME	62.5	2e-24	Osp	Protein outspread
1956	A0A1B0CHT1	Uncharacterized protein	AGRIN_CHICK	25.48	1e-24	Agrn	Agrin
1957	A0A1B0CHT2	Uncharacterized protein	CLCF_DICDI	29.25	9e-54	Clcf	Chloride channel protein F
1958	A0A1B0CHT4	Uncharacterized protein	RN146_SALSA	48.21	9e-14	Rn146	E3 ubiquitin-protein ligase rnf146
1959	A0A1B0CHT6	Uncharacterized protein	FOLT1_CAEEL	36.18	3e-34	Folt1	Folate transporter 1
1960	A0A1B0CHT7	Uncharacterized protein	PGPLE_DROME	50	1e-37	Pgple	Peptidoglycan-recognition protein LE
1961	A0A1B0CHT8	Uncharacterized protein	WWOX_CHICK	58.33	1e-05	Wwox	WW domain-containing oxidoreductase
1962	A0A1B0CHT9	Uncharacterized protein	WWOX_CHICK	39.53	2e-51	Wwox	WW domain-containing oxidoreductase
1963	A0A1B0CHU0	Uncharacterized protein	DRL_DANRE	23.51	6e-10	Drl	Zinc finger protein draculin
1964	A0A1B0CHU4	Uncharacterized protein	RD10B_XENLA	26.75	9e-20	Rd10b	Retinol dehydrogenase 10-B
1965	A0A1B0CHU5	Uncharacterized protein	RD10B_XENLA	29.75	9e-27	Rd10b	Retinol dehydrogenase 10-B
1966	A0A1B0CHU6	Uncharacterized protein	TWK7_CAEEL	37.89	6e-09	Twk7	TWiK family of potassium channels protein 7
1967	A0A1B0CHU7	Uncharacterized protein	CP9F2_DROME	45.39	5e-76	Cp9f2	Probable cytochrome P450 9f2
1968	A0A1B0CHU8	Uncharacterized protein	ST1B1_CHICK	32.61	2e-46	St1b1	Sulfotransferase family cytosolic 1B member 1
1969	A0A1B0CHU9	Uncharacterized protein	ST1B1_CHICK	40.56	3e-24	St1b1	Sulfotransferase family cytosolic 1B member 1
1970	A0A1B0CHV0	Uncharacterized protein	ST1B1_CHICK	33.7	6e-48	St1b1	Sulfotransferase family cytosolic 1B member 1
1971	A0A1B0CHV2	Uncharacterized protein	ADH_DROAD	26.14	5e-07	Adh	Alcohol dehydrogenase
1972	A0A1B0CHV3	Uncharacterized protein	ADH1_CERCO	32.62	3e-26	Adh1	Alcohol dehydrogenase 1
1973	A0A1B0CHV5	Uncharacterized protein	XDH_CHICK	36.81	1e-67	Xdh	Xanthine dehydrogenase/oxidase
1974	A0A1B0CHV7	Uncharacterized protein	CDT1_XENLA	37.31	4e-71	Cdt1	DNA replication factor Cdt1
1975	A0A1B0CHV8	Uncharacterized protein	TEY_DROME	40	9e-13	Tey	Protein Teyrha-meyrha
1976	A0A1B0CHW0	Uncharacterized protein	LAR_CAEEL	30.49	8e-07	Lar	Tyrosine-protein phosphatase Lar-like
1977	A0A1B0CHW2	Uncharacterized protein	RAB19_XENLA	71.58	4e-47	Rab19	Ras-related protein Rab-19
1978	A0A1B0CHW6	Uncharacterized protein	PB1_CHICK	37.62	0	Pbrm1	Protein polybromo-1
1979	A0A1B0CHW7	Uncharacterized protein	L259_DROME	21.24	1e-06	L259	Probable multidrug resistance-associated protein lethal(2)03659
1980	A0A1B0CHW8	Uncharacterized protein	L259_DROME	25.86	8e-17	L259	Probable multidrug resistance-associated protein lethal(2)03659
1981	A0A1B0CHW9	Uncharacterized protein	L259_DROME	38.44	2e-75	L259	Probable multidrug resistance-associated protein lethal(2)03659
1982	A0A1B0CHX0	Uncharacterized protein	CES2_CAEEL	34.15	3e-06	Ces2	Cell death specification protein 2
1983	A0A1B0CHX1	Uncharacterized protein	UBC25_CAEEL	44.09	9e-106	Ubc25	Ubiquitin-conjugating enzyme E2 25
1984	A0A1B0CHX3	Uncharacterized protein	UTP15_CHICK	37.04	6e-11	Utp15	U3 small nucleolar RNA-associated protein 15 homolog
1985	A0A1B0CHX5	Uncharacterized protein	SIR6_DROME	69.86	5e-27	Sirt6	NAD-dependent protein deacetylase Sirt6
1986	A0A1B0CHX6	Uncharacterized protein	SVOP_XENLA	25.1	6e-37	Svop	Synaptic vesicle 2-related protein
1987	A0A1B0CHX9	Uncharacterized protein	TRET1_CULQU	30.4	2e-64	Tret1	Facilitated trehalose transporter Tret1
1988	A0A1B0CHY0	Uncharacterized protein	BBS5_DANRE	25	5e-07	Bbs5	Bardet-Biedl syndrome 5 protein homolog
1989	A0A1B0CHY1	Uncharacterized protein	PSMD1_DROME	79.82	0	Rpn2	26S proteasome non-ATPase regulatory subunit 1
1990	A0A1B0CHY2	Uncharacterized protein	SLIT1_CAEEL	30	2e-06	Slit1	Slit homolog 1 protein
1991	A0A1B0CHY3	Uncharacterized protein	ST1B1_CHICK	32.03	1e-20	St1b1	Sulfotransferase family cytosolic 1B member 1
1992	A0A1B0CHY4	Uncharacterized protein	RTBS_DROME	43.48	3e-09	Rtbs	Probable RNA-directed DNA polymerase from transposon BS
1993	A0A1B0CHY7	Uncharacterized protein	UBA5_DROMO	74.44	5e-173	Uba5	Ubiquitin-like modifier-activating enzyme 5
1994	A0A1B0CHY9	Uncharacterized protein	CACP_COLLI	46.5	2e-34	Crat	Carnitine O-acetyltransferase
1995	A0A1B0CHZ1	Uncharacterized protein	NPLB_XENLA	29.06	1e-25	Nplb	N-acetylneuraminate lyase B
1996	A0A1B0CHZ3	Uncharacterized protein	NPLB_XENLA	37.66	3e-09	Nplb	N-acetylneuraminate lyase B
1997	A0A1B0CHZ5	Uncharacterized protein	INT3_ANOGA	55.78	0	Int3	Integrator complex subunit 3 homolog
1998	A0A1B0CHZ6	Uncharacterized protein	HINT_CAEEL	61.07	6e-47	Hint	Histidine triad nucleotide-binding protein 1
1999	A0A1B0CHZ8	Uncharacterized protein	GAGJ_DROFU	34.25	2e-06	Gag	Nucleic-acid-binding protein from mobile element jockey
[truncated: 4,214 more rows]
