# Supplementary material for: Improved annotation of Lutzomyia longipalpis genome using bioinformatics analysis
Source: PeerJ. 2019 Oct 9;7:e7862. doi: 10.7717/peerj.7862 (PMC6790103; doi:10.7717/peerj.7862)
Supplement: Table S2 [file peerj-07-7862-s002.xlsx]

## Sheet: Supp.Table_2
No.	miRNA	Gene	p-value	MFE	protein name
1	llo-miR-10457-5p	Lamc	0.000877	-25.1	Lamin-C
2	llo-miR-10457-5p	Hil	0.000621	-26.5	Hillarin
3	llo-miR-10457-5p	Pcx	0.002508	-27.2	Protein pecanex
4	llo-miR-10457-5p	Bib	0.00238	-25.7	Neurogenic protein big brain
5	llo-miR-10457-5p	Mfrn	0.003164	-26.5	Mitoferrin
6	llo-miR-10457-5p	Tun	0.00016	-27.3	Protein N-terminal glutamine amidohydrolase
7	llo-miR-10457-5p	Rab8	0.000283	-27.4	Ras-related protein Rab-8
8	llo-miR-10457-5p	Vha55	0.001129	-25.3	V-type proton ATPase subunit B
9	llo-miR-10457-5p	Tbp	1.1e-05	-27	TATA-box-binding protein
10	llo-miR-10483-3p	Patj	0.006525	-25.2	Patj homolog
11	llo-miR-10483-3p	Comt	0.001452	-28.7	Vesicle-fusing ATPase 1
12	llo-miR-10483-3p	Cpb	0.005457	-27.5	F-actin-capping protein subunit beta
13	llo-miR-10483-3p	Meigo	0.004315	-25.5	Solute carrier family 35 member B1 homolog
14	llo-miR-10483-3p	Arp10	0.00016	-27.2	Actin-related protein 10
15	llo-miR-10483-3p	Pgi	0.003134	-25.5	Glucose-6-phosphate isomerase
16	llo-miR-10483-3p	Mrpl28	0.000328	-25.2	39S ribosomal protein L28, mitochondrial
17	llo-miR-2057-3p	Vvl	0.001798	-32.5	POU domain protein CF1A
18	llo-miR-2057-3p	Dos	0.005668	-27.5	Protein daughter of sevenless
19	llo-miR-2057-3p	Cpa	0.006861	-28.4	F-actin-capping protein subunit alpha
20	llo-miR-2057-3p	Awh	0.005328	-28.5	LIM/homeobox protein Awh
21	llo-miR-2057-3p	Flr	0.002049	-27.7	Actin-interacting protein 1
22	llo-miR-2057-3p	Smd1	0.000198	-30.1	Probable small nuclear ribonucleoprotein Sm D1
23	llo-miR-2057-3p	Pygo	0.007401	-29	Protein pygopus
24	llo-miR-2057-3p	Roc1a	0.005449	-28.2	RING-box protein 1A
25	llo-miR-2057-3p	Lin28	0.00649	-25.2	Protein lin-28 homolog
26	llo-miR-2057-3p	Mhc	0.008152	-27.5	Myosin heavy chain, muscle
27	llo-miR-2057-3p	Pkc98e	0.001333	-31	Protein kinase C
28	llo-miR-2057-3p	Drpr	0.003635	-30	Protein draper
29	llo-miR-2057-3p	Sgg	0.005174	-27.7	Protein kinase shaggy
30	llo-miR-2057-3p	Chb	0.003665	-28.8	CLIP-associating protein
31	llo-miR-2057-3p	Nelfb	0.00357	-27	Negative elongation factor B
32	llo-miR-2057-3p	Sing	0.006225	-30.7	Protein singed
33	llo-miR-2057-3p	Vinc	0.000272	-32.9	Vinculin
34	llo-miR-2057-3p	Gdl	0.001577	-27.6	Gonadal protein gdl
35	llo-miR-2057-3p	Nkain	0.00867	-29.5	Sodium/potassium-transporting ATPase subunit beta-1-interacting protein
36	llo-miR-2057-3p	Pcx	0.002788	-31.4	Protein pecanex
37	llo-miR-2057-3p	U2af38	0.003165	-29	Splicing factor U2af 38 kDa subunit
38	llo-miR-2057-3p	Sep2	0.003454	-25.5	Septin-2
39	llo-miR-2057-3p	Uch	0.003985	-25.5	Ubiquitin carboxyl-terminal hydrolase
40	llo-miR-2057-3p	Noc	0.008921	-27.4	Zinc finger protein Noc
41	llo-miR-2057-3p	Bol	0.004755	-29.7	Protein boule
42	llo-miR-2057-3p	Tm2	0.002007	-26.2	Tropomyosin-2
43	llo-miR-2057-3p	Kdelr	0.006984	-25.9	ER lumen protein-retaining receptor
44	llo-miR-2057-3p	Gad1	0.008186	-29.4	Glutamate decarboxylase
45	llo-miR-2057-3p	Ote	0.000429	-28.1	Otefin
46	llo-miR-2057-3p	Lolal	0.00076	-28.7	Longitudinals lacking protein-like
47	llo-miR-2057-3p	Prd	0.000492	-29.5	Segmentation protein paired
48	llo-miR-2057-3p	Glys	0.005633	-26.3	Glycogen [starch] synthase
49	llo-miR-2057-3p	Pcs	0.001275	-27.5	SH3 domain-binding protein 5 homolog
50	llo-miR-2057-3p	Zip99c	0.002816	-26.3	Zinc transporter ZIP13 homolog
51	llo-miR-2057-3p	Tfb1	0.000602	-26	General transcription factor IIH subunit 1
52	llo-miR-2057-3p	Tey	0.003397	-27.8	Protein Teyrha-meyrha
53	llo-miR-2057-3p	Pdk	0.005506	-26.5	[Pyruvate dehydrogenase (acetyl-transferring)] kinase, mitochondrial
54	llo-miR-2057-3p	Rps5a	0.000456	-26.2	40S ribosomal protein S5a
55	llo-miR-2057-3p	Dph5	0.000787	-26.9	Diphthine methyl ester synthase
56	llo-miR-2057-3p	Lsm4	0.005572	-25.2	Probable U6 snRNA-associated Sm-like protein LSm4
57	llo-miR-2057-3p	Med14	0.008754	-27.4	Mediator of RNA polymerase II transcription subunit 14
58	llo-miR-2057-3p	Oxt	0.007329	-26.8	Xylosyltransferase oxt
59	llo-miR-2057-3p	Vir	0.003904	-25.1	Protein virilizer
60	llo-miR-2057-3p	Mab21	0.002054	-29.5	Protein mab-21
61	llo-miR-2057-3p	Sap30	0.004522	-29.5	Histone deacetylase complex subunit SAP30 homolog
62	llo-miR-2057-3p	Tll	0.006495	-26.2	Protein tailless
63	llo-miR-2057-3p	Rplp1	0.001444	-27.8	60S acidic ribosomal protein P1
64	llo-miR-2057-3p	Sxl	0.005553	-30.4	Sex-lethal homolog
65	llo-miR-2057-3p	Arm	0.004979	-27	Armadillo segment polarity protein
66	llo-miR-2057-3p	Dpp	0.008913	-29.2	Protein decapentaplegic
67	llo-miR-2057-3p	Ef2	0.004592	-26.9	Elongation factor 2
68	llo-miR-2057-3p	Fech	0.0058	-27.4	Ferrochelatase, mitochondrial
69	llo-miR-2057-3p	Oat	0.001047	-25.1	Probable ornithine aminotransferase, mitochondrial
70	llo-miR-2057-3p	Orco	0.000288	-29.7	Odorant receptor coreceptor
71	llo-miR-2057-3p	Rab8	0.001693	-29.2	Ras-related protein Rab-8
72	llo-miR-2057-3p	Ras	0.007807	-27.3	Ras-like protein
73	llo-miR-2057-3p	Rpl13a	0.009729	-26.8	60S ribosomal protein L13a
74	llo-miR-2057-3p	Scp1	0.003228	-28.2	Sarcoplasmic calcium-binding protein 1
75	llo-miR-2057-3p	Slx1	0.004074	-25.2	Structure-specific endonuclease subunit SLX1 homolog
76	llo-miR-2057-3p	Tctp	0.000523	-33.2	Translationally-controlled tumor protein homolog
77	llo-miR-2057-3p	Tim	0.003571	-31.4	Protein timeless
78	llo-miR-2057-3p	Arpc4	3.5e-05	-28.5	Actin-related protein 2/3 complex subunit 4
79	llo-miR-2057-3p	Rps13	0.002437	-27.4	40S ribosomal protein S13
80	llo-miR-2057-3p	Rps27	0.007834	-26.1	40S ribosomal protein S27
81	llo-miR-2057-3p	Taf6	0.000264	-28.1	Transcription initiation factor TFIID subunit 6
82	llo-miR-2057-3p	Ssu72	0.005053	-28.4	RNA polymerase II subunit A C-terminal domain phosphatase SSU72
83	llo-miR-2057-3p	Rpl36	0.000277	-27.1	60S ribosomal protein L36
84	llo-miR-2057-3p	Cisd2	0.003219	-25.1	CDGSH iron-sulfur domain-containing protein 2 homolog
85	llo-miR-2057-3p	Cul3	0.001631	-28	Cullin-3
86	llo-miR-316-5p	Arpc2	0.002998	-25.6	Probable actin-related protein 2/3 complex subunit 2
87	llo-miR-316-5p	Fd96ca	0.000331	-25.7	Fork head domain-containing protein FD4
88	llo-miR-316-5p	Med14	0.004684	-25.6	Mediator of RNA polymerase II transcription subunit 14
89	llo-miR-316-5p	Mlc1	0.004244	-26.5	Myosin light chain alkali
90	llo-miR-3841-3p	Rbbp5	0.000849	-25.1	Retinoblastoma-binding protein 5 homolog
91	llo-miR-3871-5p	B52	0.003927	-25.4	Serine-arginine protein 55
92	llo-miR-3871-5p	Tipe	0.001438	-29.4	Protein tipE
93	llo-miR-3871-5p	Crag	0.004284	-29.2	DENN domain-containing protein Crag
94	llo-miR-3871-5p	Sol	0.000806	-28.5	Calpain-D
95	llo-miR-3871-5p	Sep1	0.002807	-28.4	Septin-1
96	llo-miR-3871-5p	Tty	0.007091	-26.1	Protein tweety
97	llo-miR-3871-5p	Dll	0.005575	-26.3	Homeotic protein distal-less
98	llo-miR-3871-5p	Tamo	0.000681	-29.8	Protein tamozhennic
99	llo-miR-3871-5p	Bol	0.004136	-28.4	Protein boule
100	llo-miR-3871-5p	Dnk	0.003179	-25.1	Deoxynucleoside kinase
101	llo-miR-3871-5p	Fus	0.003701	-27.2	RNA-binding protein fusilli
102	llo-miR-3871-5p	Diap2	0.001405	-27.6	Death-associated inhibitor of apoptosis 2
103	llo-miR-3871-5p	Rac2	0.002224	-29.7	Ras-related protein Rac2
104	llo-miR-3871-5p	Eya	0.007806	-25.7	Developmental protein eyes absent
105	llo-miR-3871-5p	Dab	0.005271	-28.1	Protein disabled
106	llo-miR-3871-5p	Sap30	0.00511	-27.8	Histone deacetylase complex subunit SAP30 homolog
107	llo-miR-3871-5p	Argk	0.000133	-31.2	Arginine kinase
108	llo-miR-3871-5p	Rpl13a	0.00532	-26.3	60S ribosomal protein L13a
109	llo-miR-3871-5p	Rpl3	0.001899	-26.1	60S ribosomal protein L3
110	llo-miR-3871-5p	Svp	0.009044	-28.6	Steroid receptor seven-up, isoform A
111	llo-miR-3871-5p	Tim	0.00182	-30.9	Protein timeless
112	llo-miR-3871-5p	Tpi	0.000698	-26.8	Triosephosphate isomerase
113	llo-miR-3871-5p	Ing3	0.000191	-25.6	Inhibitor of growth protein 3
114	llo-miR-4113-5p	Vha44	0.001393	-26.1	V-type proton ATPase subunit C
115	llo-miR-5101	Vhasfd	0.006147	-25.8	V-type proton ATPase subunit H
116	llo-miR-5101	Gclc	0.004439	-26.3	Glutamate--cysteine ligase
117	llo-miR-5101	Chb	5.4e-05	-31.4	CLIP-associating protein
118	llo-miR-5101	Blw	4.5e-05	-30.6	ATP synthase subunit alpha, mitochondrial
119	llo-miR-5101	Clp	0.000288	-26	Cleavage and polyadenylation specificity factor subunit 4
120	llo-miR-5101	Tamo	0.005419	-25.1	Protein tamozhennic
121	llo-miR-5101	Eff	0.00796	-25.8	Ubiquitin-conjugating enzyme E2-17 kDa
122	llo-miR-5101	Cdsa	0.000175	-30.5	Phosphatidate cytidylyltransferase, photoreceptor-specific
123	llo-miR-5101	Pdk	0.000792	-26.1	[Pyruvate dehydrogenase (acetyl-transferring)] kinase, mitochondrial
124	llo-miR-5101	Eya	0.001175	-26.7	Developmental protein eyes absent
125	llo-miR-5101	Gpdh	0.006816	-25.7	Glycerol-3-phosphate dehydrogenase [NAD(+)], cytoplasmic
126	llo-miR-5101	Lis1	0.000318	-26.7	Lissencephaly-1 homolog
127	llo-miR-5101	Ald	0.003942	-25.8	Fructose-bisphosphate aldolase
128	llo-miR-5101	Melt	0.000975	-25.5	Protein melted
129	llo-miR-5101	Rab1	0.007885	-25.4	Ras-related protein ORAB-1
130	llo-miR-5101	Rpl3	0.000428	-26.4	60S ribosomal protein L3
131	llo-miR-5101	Scra	0.000228	-26.6	Anillin
132	llo-miR-5101	Vps26	0.005971	-25.5	Vacuolar protein sorting-associated protein 26
133	llo-miR-5101	Surf4	0.002019	-26.2	Surfeit locus protein 4 homolog
134	llo-miR-5101	Edc3	0.003009	-28.3	Enhancer of mRNA-decapping protein 3
135	llo-miR-5101	Suz12	0.006398	-25.2	Polycomb protein suz12
136	llo-miR-6064-5p	Sqz	0.003533	-26.4	Zinc finger protein squeeze
137	llo-miR-6064-5p	Tim	0.007256	-27.3	Protein timeless
138	llo-miR-92b-5p	Ofut1	0.000127	-26.7	GDP-fucose protein O-fucosyltransferase 1
139	llo-miR-92b-5p	Flii	0.001875	-26.2	Protein flightless-1
140	llo-miR-92b-5p	Pen	0.000879	-26.2	Importin subunit alpha
141	llo-miR-92b-5p	Prm	0.000365	-25.5	Paramyosin, long form
142	llo-miR-9375-5p	Comt	0.004673	-26.2	Vesicle-fusing ATPase 1
143	llo-miR-9388-5p	Mer	1.6e-05	-33.1	Moesin/ezrin/radixin homolog 2
144	llo-miR-9388-5p	Tty	0.001253	-25.6	Protein tweety
145	llo-miR-9388-5p	Hts	0.005368	-26.2	Protein hu-li tai shao
146	llo-miR-9388-5p	Eya	0.000949	-25.7	Developmental protein eyes absent
147	llo-miR-9388-5p	Rogdi	0.000698	-27.9	Protein rogdi
148	llo-miR-9388-5p	Cbp80	0.000719	-26	Nuclear cap-binding protein subunit 1
149	llo-miR-9388-5p	Got1	0.000115	-26.8	Probable Golgi transport protein 1
150	llo-miR-9388-5p	Mon2	1.9e-05	-27.7	Protein MON2 homolog
151	llo-miR-989-3p	Cpa	0.007037	-25.5	F-actin-capping protein subunit alpha
152	llo-miR-989-3p	Eag	0.006413	-26.4	Potassium voltage-gated channel protein eag
153	llo-miR-989-3p	Nelfb	0.000121	-28.6	Negative elongation factor B
154	llo-miR-989-3p	Nkain	0.007903	-26.7	Sodium/potassium-transporting ATPase subunit beta-1-interacting protein
155	llo-miR-989-3p	Cdlc2	0.000706	-25.2	Dynein light chain 2, cytoplasmic
156	llo-miR-989-3p	Anxb9	0.000308	-27.6	Annexin B9
157	llo-miR-989-3p	Poxn	0.001308	-25.3	Paired box pox-neuro protein
158	llo-miR-989-3p	Cbp80	0.001079	-27	Nuclear cap-binding protein subunit 1
159	llo-miR-989-3p	Adsl	0.004357	-26	Adenylosuccinate lyase
160	llo-miR-989-3p	Fech	0.003258	-25.4	Ferrochelatase, mitochondrial
161	llo-miR-989-3p	Rps26	0.00848	-26.6	40S ribosomal protein S26
162	llo-miR-989-3p	Vih	0.006405	-25.1	Ubiquitin-conjugating enzyme E2 C
163	llo-miR-989-3p	Taf6	0.000201	-25.4	Transcription initiation factor TFIID subunit 6
164	llo-miR-989-3p	Ntf2	0.003225	-26.1	Probable nuclear transport factor 2
165	llo-miR-989-3p	Cdk7	0.00061	-25.9	Cyclin-dependent kinase 7
166	llo-miR-989-3p	Ssu72	0.003841	-25.9	RNA polymerase II subunit A C-terminal domain phosphatase SSU72
